# Supplementary material
Source: PubMed Central journal article supplement (PMC6867864)
Supplement: IAI.00319-19-s0001.pdf [file IAI.00319-19-s0001.pdf]

Fig. S1

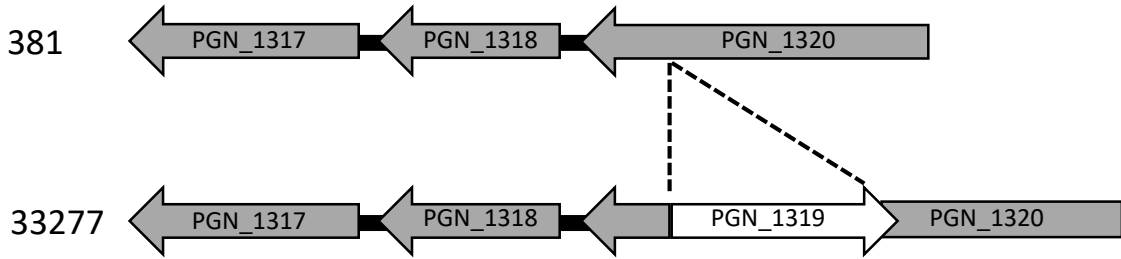

FIG. S1. Illustration of the insertion sequence, PGN\_1319, present in the 33277 genome relative to the 381 genome. PGN\_1319 disrupts the expression of a putative operon, PGN\_1320-PGN\_1317 in strain 33277.

Fig. S2

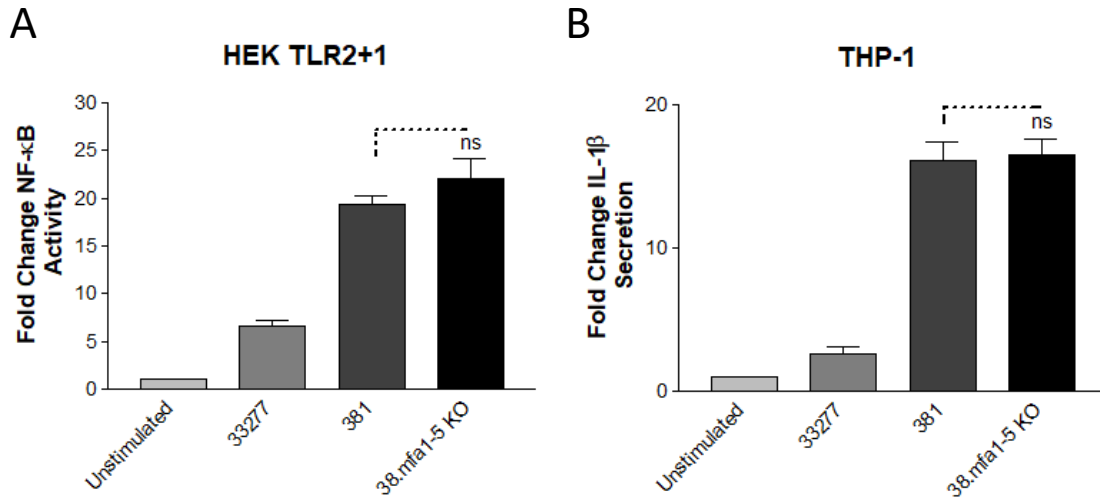

FIG S2. Immune-stimulatory capacity of strain 381 is not appreciably altered in an isogenic mutant strain bearing a deletion of the *mfa1-mfa5* gene cluster. (A) HEK cells expressing TLR2 were stimulated with wild-type strains 33277 and 381 and the indicated isogenic mutant strains ( $10^5$  bacteria). Fold change in NF- $\kappa$ B activation from bacterial stimulations is shown relative to the unstimulated control. (B) Differentiated THP-1 cell were stimulated with wild-type strains 33277 and 381 and the indicated isogenic mutant strains ( $10^5$  bacteria). Fold change in IL-1 $\beta$  production from bacterial stimulations is shown relative to the unstimulated control. Data are presented as means  $\pm$ SD from triplicate sample determinations and are representative of two independent experiments. Statistical significance was determined by student's unpaired *t* test (ns=not statistically significant).

Fig. S3

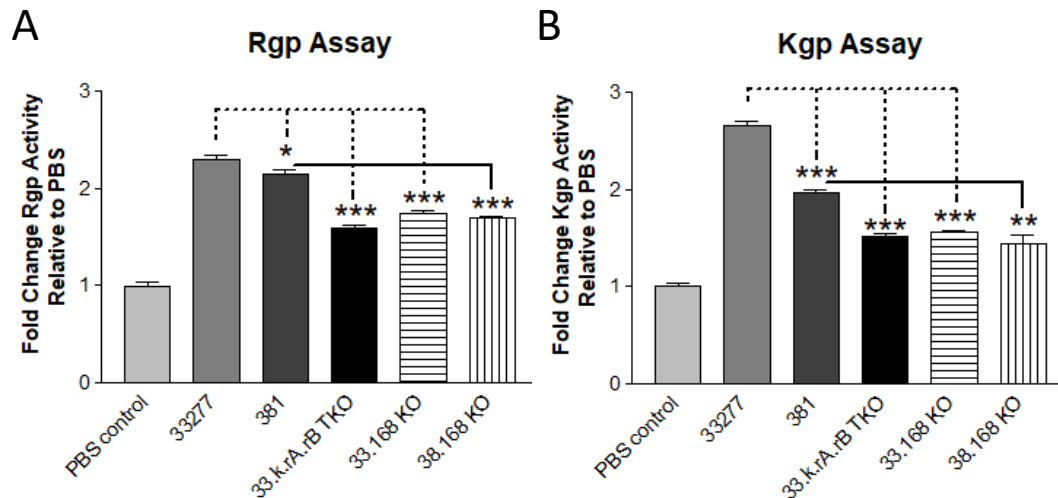

FIG S3. Comparison of gingipain activities for wild-type and gingipain-deficient mutant strains. (A) Arginine (Rgp)-dependent and (B) Lysine (Kgp)-dependent gingipain substrates were exposed to strains 33277 and 381 ( $10^8$  bacteria) and OD450 nm was determined. Fold change in gingipain activity is shown relative to the media control. Data are presented as means  $\pm$ SD from triplicate sample determinations and are representative of two independent experiments. Asterisks indicate statistical significance as determined by student's unpaired *t* test (\* $P < 0.05$ , \*\* $P < 0.001$ , \*\*\* $P < 0.0001$ ).

Fig. S4

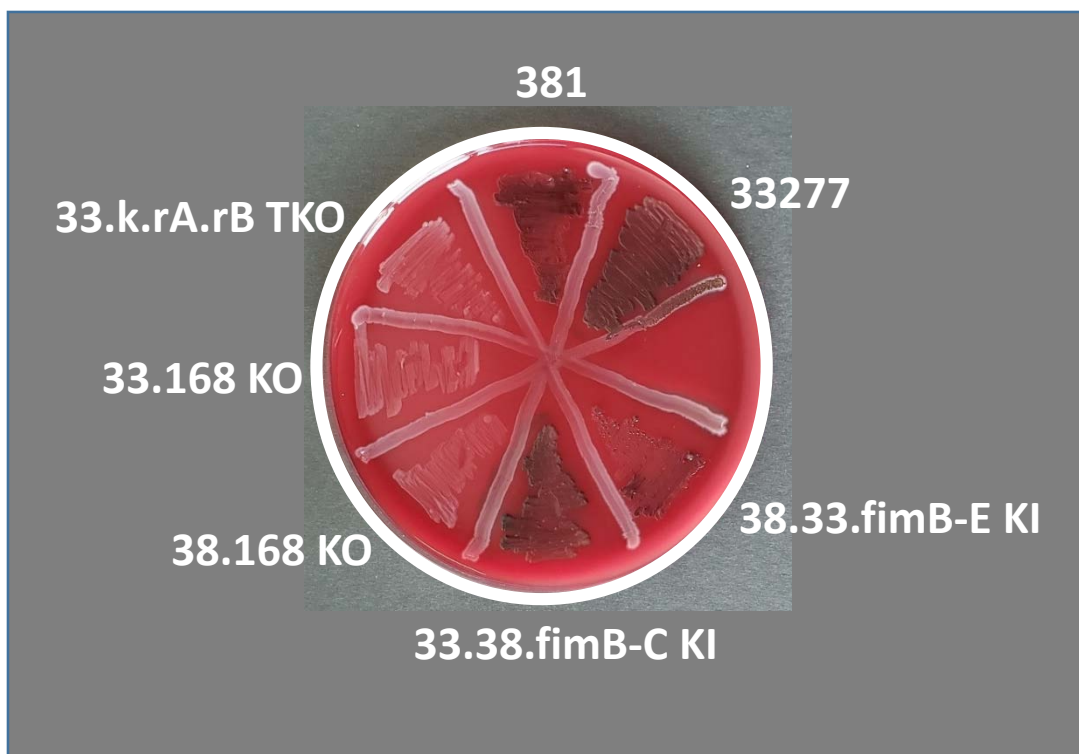

FIG S4. Comparison of pigmentation phenotypes for wild-type, *fimB* mutant, and gingipain-deficient *P. gingivalis* strains. The indicated strains were co-streaked on a blood agar plate and grown anaerobically.

TABLE S1. Complete comparison of 33277 and 381 transcriptomes<sup>a,b</sup>.

(Table begins on the next page.)

<sup>a</sup>Gene numbers are listed according to the *P. gingivalis* ATCC 33277 annotations.

<sup>b</sup>Differential expression values are shown as both 33277 fold change relative to 381, and Log<sub>2</sub> ratio (33277:381).

| Sequence Name | locus_tag | product                                                                                | gene | minimum | maximum | length | direction | fold change | Differential Expression Log2 Ratio | Differential Expression p-value | Differential Expression Adjusted p-value | Differential Expression Log2 Standard Error | Differential Expression Wald Statistic | type | db_xref      | protein_id |
|---------------|-----------|----------------------------------------------------------------------------------------|------|---------|---------|--------|-----------|-------------|------------------------------------|---------------------------------|------------------------------------------|---------------------------------------------|----------------------------------------|------|--------------|------------|
| AP009380      | PGN_0001  | chromosomal replication initiator protein DnaA                                         | dnaA | 1       | 1422    | 1422   | forward   | 1.177       | 0.235                              | 0.315                           | 0.465                                    | 0.234                                       | 1.005                                  | CDS  | GI:188593545 | BAG32520.1 |
| AP009380      | PGN_0002  | conserved hypothetical protein                                                         |      | 1435    | 2007    | 573    | forward   | 1.275       | 0.351                              | 0.129                           | 0.251                                    | 0.231                                       | 1.518                                  | CDS  | GI:188593546 | BAG32521.1 |
| AP009380      | PGN_0003  | conserved hypothetical protein                                                         |      | 2009    | 3028    | 1020   | reverse   | 1.426       | 0.512                              | 0.033                           | 0.098                                    | 0.241                                       | 2.127                                  | CDS  | GI:188593547 | BAG32522.1 |
| AP009380      | PGN_0004  | putative nicotinate mononucleotide:5,6-dimethylbenzimidazole phosphoribosyltransferase |      | 3108    | 3812    | 705    | forward   | 0.968       | -0.047                             | 0.903                           | 0.942                                    | 0.390                                       | -0.121                                 | CDS  | GI:188593548 | BAG32523.1 |
| AP009380      | PGN_0005  | conserved hypothetical protein                                                         |      | 3887    | 5041    | 1155   | reverse   | 0.744       | -0.427                             | 0.059                           | 0.144                                    | 0.226                                       | -1.890                                 | CDS  | GI:188593549 | BAG32524.1 |
| AP009380      | PGN_0006  | putative Na <sup>+</sup> -driven multidrug efflux pump                                 |      | 5094    | 6473    | 1380   | reverse   | 0.647       | -0.629                             | 0.005                           | 0.028                                    | 0.226                                       | -2.784                                 | CDS  | GI:188593550 | BAG32525.1 |
| AP009380      | PGN_0007  | hypothetical protein                                                                   |      | 6487    | 6642    | 156    | forward   | 0.347       | -1.527                             | 0.010                           | 0.043                                    | 0.592                                       | -2.580                                 | CDS  | GI:188593551 | BAG32526.1 |
| AP009380      | PGN_10001 | tRNA-Asn                                                                               |      | 6601    | 6677    | 77     | reverse   | 0.346       | -1.530                             | 0.010                           | 0.042                                    | 0.592                                       | -2.585                                 | tRNA |              |            |
| AP009380      | PGN_10002 | tRNA-Asn                                                                               |      | 6700    | 6773    | 74     | reverse   | 0.327       | -1.613                             | 0.006                           | 0.032                                    | 0.591                                       | -2.729                                 | tRNA |              |            |
| AP009380      | PGN_0008  | ATP-dependent Clp protease ATP-binding subunit ClpC                                    | clpC | 7400    | 9979    | 2580   | forward   | 0.459       | -1.123                             | 0.001                           | 0.009                                    | 0.347                                       | -3.238                                 | CDS  | GI:188593552 | BAG32527.1 |
| AP009380      | PGN_0009  | glycosyl hydrolase family 3                                                            |      | 10119   | 13130   | 3012   | forward   | 1.106       | 0.146                              | 0.545                           | 0.671                                    | 0.241                                       | 0.605                                  | CDS  | GI:188593553 | BAG32528.1 |
| AP009380      | PGN_0010  | probable L-threonine-O-3-phosphate decarboxylase                                       |      | 13178   | 14206   | 1029   | forward   | 1.360       | 0.443                              | 0.063                           | 0.151                                    | 0.239                                       | 1.858                                  | CDS  | GI:188593554 | BAG32529.1 |
| AP009380      | PGN_0011  | conserved hypothetical protein                                                         |      | 14216   | 14986   | 771    | forward   | 1.606       | 0.684                              | 0.004                           | 0.024                                    | 0.239                                       | 2.855                                  | CDS  | GI:188593555 | BAG32530.1 |
| AP009380      | PGN_0012  | two-component system response regulator                                                |      | 15571   | 16920   | 1350   | forward   | 1.592       | 0.671                              | 0.033                           | 0.098                                    | 0.315                                       | 2.128                                  | CDS  | GI:188593556 | BAG32531.1 |
| AP009380      | PGN_0013  | putative two-component system sensor histidine kinase                                  |      | 16930   | 18267   | 1338   | forward   | 1.437       | 0.523                              | 0.147                           | 0.274                                    | 0.361                                       | 1.449                                  | CDS  | GI:188593557 | BAG32532.1 |
| AP009380      | PGN_0014  | conserved hypothetical protein                                                         |      | 18271   | 20517   | 2247   | forward   | 1.889       | 0.917                              | 0.049                           | 0.126                                    | 0.466                                       | 1.968                                  | CDS  | GI:188593558 | BAG32533.1 |
| AP009380      | PGN_0015  | probable transcriptional regulator                                                     |      | 20602   | 21306   | 705    | forward   | 0.969       | -0.045                             | 0.824                           | 0.885                                    | 0.205                                       | -0.222                                 | CDS  | GI:188593559 | BAG32534.1 |
| AP009380      | PGN_0016  | putative TIM-barrel protein                                                            |      | 21292   | 22293   | 1002   | reverse   | 1.248       | 0.320                              | 0.212                           | 0.354                                    | 0.256                                       | 1.247                                  | CDS  | GI:188593560 | BAG32535.1 |
| AP009380      | PGN_0017  | sulfate transporter permease                                                           |      | 22290   | 23966   | 1677   | reverse   | 1.325       | 0.406                              | 0.101                           | 0.214                                    | 0.248                                       | 1.639                                  | CDS  | GI:188593561 | BAG32536.1 |
| AP009380      | PGN_0018  | hypothetical protein                                                                   |      | 24234   | 24404   | 171    | reverse   | 0.251       | -1.994                             | 0.000                           | 0.000                                    | 0.303                                       | -6.584                                 | CDS  | GI:188593562 | BAG32537.1 |
| AP009380      | PGN_0019  | hypothetical protein                                                                   |      | 24770   | 24880   | 111    | forward   | 0.268       | -1.899                             | 0.000                           | 0.003                                    | 0.528                                       | -3.600                                 | CDS  | GI:188593563 | BAG32538.1 |
| AP009380      | PGN_0020  | probable DNA-binding protein                                                           |      | 24952   | 26088   | 657    | forward   | 1.021       | 0.031                              | 0.908                           | 0.945                                    | 0.264                                       | 0.116                                  | CDS  | GI:188593564 | BAG32539.1 |
| AP009380      | PGN_0021  | probable hydrolase                                                                     |      | 25677   | 26336   | 660    | forward   | 0.816       | -0.293                             | 0.331                           | 0.481                                    | 0.302                                       | -0.971                                 | CDS  | GI:188593565 | BAG32540.1 |
| AP009380      | PGN_0022  | Por secretion system protein porU                                                      | porU | 26349   | 29825   | 3477   | forward   | 1.683       | 0.751                              | 0.001                           | 0.007                                    | 0.223                                       | 3.360                                  | CDS  | GI:188593566 | BAG32541.1 |
| AP009380      | PGN_0023  | Por secretion system protein porV (pg27, lptO)                                         | porV | 29901   | 31076   | 1176   | forward   | 2.007       | 1.005                              | 0.000                           | 0.004                                    | 0.284                                       | 3.536                                  | CDS  | GI:188593567 | BAG32542.1 |
| AP009380      | PGN_0024  | putative 2C-methyl-D-erythritol 2,4-cyclodiphosphate synthase                          |      | 31083   | 31571   | 489    | forward   | 1.092       | 0.127                              | 0.564                           | 0.686                                    | 0.221                                       | 0.576                                  | CDS  | GI:188593568 | BAG32543.1 |
| AP009380      | PGN_0025  | probable SpoU rRNA methylase family protein                                            |      | 31674   | 32216   | 543    | reverse   | 0.861       | -0.216                             | 0.417                           | 0.555                                    | 0.266                                       | -0.812                                 | CDS  | GI:188593569 | BAG32544.1 |
| AP009380      | PGN_10003 | tRNA-Gln                                                                               |      | 32732   | 32805   | 74     | forward   | 0.510       | -0.971                             | 0.023                           | 0.075                                    | 0.427                                       | -2.276                                 | tRNA |              |            |
| AP009380      | PGN_0026  | putative cytidine deaminase                                                            |      | 33069   | 33545   | 477    | forward   | 1.129       | 0.176                              | 0.500                           | 0.634                                    | 0.261                                       | 0.674                                  | CDS  | GI:188593570 | BAG32545.1 |
| AP009380      | PGN_0027  | transposase in ISPg1                                                                   |      | 33765   | 38450   | 4686   | forward   | 0.600       | -0.736                             | 0.098                           | 0.210                                    | 0.445                                       | -1.653                                 | CDS  | GI:188593571 | BAG32546.1 |
| AP009380      | PGN_0028  | hypothetical protein                                                                   |      | 34875   | 35024   | 150    | forward   | 0.765       | -0.386                             | 0.378                           | 0.520                                    | 0.438                                       | -0.882                                 | CDS  | GI:188593572 | BAG32547.1 |
| AP009380      | PGN_0029  | conserved hypothetical protein                                                         |      | 35420   | 36004   | 585    | reverse   | 0.721       | -0.471                             | 0.138                           | 0.262                                    | 0.318                                       | -1.483                                 | CDS  | GI:188593573 | BAG32548.1 |
| AP009380      | PGN_0030  | beta-mannosidase                                                                       |      | 36142   | 38688   | 2547   | reverse   | 1.470       | 0.556                              | 0.014                           | 0.054                                    | 0.226                                       | 2.463                                  | CDS  | GI:188593574 | BAG32549.1 |
| AP009380      | PGN_0031  | conserved hypothetical protein with RmuC domain                                        |      | 38757   | 40055   | 1299   | reverse   | 1.059       | 0.082                              | 0.723                           | 0.809                                    | 0.232                                       | 0.355                                  | CDS  | GI:188593575 | BAG32550.1 |
| AP009380      | PGN_0032  | conserved hypothetical protein                                                         |      | 40103   | 40276   | 174    | forward   | 0.971       | -0.042                             | 0.926                           | 0.952                                    | 0.452                                       | -0.093                                 | CDS  | GI:188593576 | BAG32551.1 |
| AP009380      | PGN_0033  | thioredoxin                                                                            |      | 40685   | 40995   | 315    | reverse   | 1.185       | 0.245                              | 0.471                           | 0.609                                    | 0.340                                       | 0.721                                  | CDS  | GI:188593577 | BAG32552.1 |
| AP009380      | PGN_0034  | DNA polymerase III alpha subunit                                                       |      | 41048   | 44734   | 3687   | reverse   | 1.064       | 0.089                              | 0.667                           | 0.766                                    | 0.207                                       | 0.430                                  | CDS  | GI:188593578 | BAG32553.1 |
| AP009380      | PGN_0035  | 50S ribosomal protein L19                                                              | rplS | 45013   | 45378   | 366    | forward   | 0.840       | -0.252                             | 0.229                           | 0.371                                    | 0.209                                       | -1.204                                 | CDS  | GI:188593579 | BAG32554.1 |
| AP009380      | PGN_0036  | hypothetical protein                                                                   |      | 45792   | 46055   | 264    | forward   | 0.419       | -1.256                             | 0.000                           | 0.030                                    | 0.340                                       | -3.692                                 | CDS  | GI:188593580 | BAG32555.1 |
| AP009380      | PGN_0037  | conserved hypothetical protein                                                         |      | 46140   | 46259   | 120    | forward   | 0.467       | -1.099                             | 0.002                           | 0.013                                    | 0.352                                       | -3.121                                 | CDS  | GI:188593581 | BAG32556.1 |
| AP009380      | PGN_0038  | serine hydroxymethyltransferase                                                        |      | 46617   | 47897   | 1281   | forward   | 1.706       | 0.770                              | 0.007                           | 0.034                                    | 0.287                                       | 2.685                                  | CDS  | GI:188593582 | BAG32557.1 |
| AP009380      | PGN_0039  | beta-hexosaminidase                                                                    |      | 48048   | 50387   | 2340   | forward   | 2.401       | 1.264                              | 0.001                           | 0.007                                    | 0.377                                       | 3.349                                  | CDS  | GI:188593583 | BAG32558.1 |
| AP009380      | PGN_0040  | hypothetical protein                                                                   |      | 50737   | 53850   | 114    | reverse   | 3.372       | 1.754                              | 0.000                           | 0.002                                    | 0.453                                       | 3.874                                  | CDS  | GI:188593584 | BAG32559.1 |
| AP009380      | PGN_0041  | heat shock protein 90                                                                  | htpG | 51051   | 53105   | 2055   | forward   | 0.471       | -1.085                             | 0.000                           | 0.003                                    | 0.294                                       | -3.690                                 | CDS  | GI:188593585 | BAG32560.1 |
| AP009380      | PGN_0042  | probable phosphatidate cytidylyltransferase                                            |      | 53288   | 54142   | 855    | reverse   | 0.990       | -0.015                             | 0.963                           | 0.972                                    | 0.316                                       | -0.047                                 | CDS  | GI:188593586 | BAG32561.1 |
| AP009380      | PGN_0043  | putative transmembrane AAA-metalloprotease FtsH                                        |      | 54171   | 56192   | 2022   | reverse   | 1.355       | 0.438                              | 0.140                           | 0.263                                    | 0.297                                       | 1.476                                  | CDS  | GI:188593587 | BAG32562.1 |
| AP009380      | PGN_0044  | GTP-binding protein                                                                    |      | 56393   | 57496   | 1104   | reverse   | 1.147       | 0.198                              | 0.381                           | 0.524                                    | 0.226                                       | 0.876                                  | CDS  | GI:188593588 | BAG32563.1 |
| AP009380      | PGN_0045  | conserved hypothetical protein                                                         |      | 57515   | 57679   | 165    | reverse   | 0.748       | -0.418                             | 0.168                           | 0.301                                    | 0.304                                       | -1.378                                 | CDS  | GI:188593589 | BAG32564.1 |
| AP009380      | PGN_0046  | hypothetical protein                                                                   |      | 58549   | 58815   | 267    | forward   | 0.757       | -0.402                             | 0.180                           | 0.314                                    | 0.300                                       | -1.342                                 | CDS  | GI:188593590 | BAG32565.1 |
| AP009380      | PGN_0047  | conserved hypothetical protein                                                         |      | 58828   | 59046   | 219    | forward   | 0.578       | -0.790                             | 0.100                           | 0.212                                    | 0.480                                       | -1.647                                 | CDS  | GI:188593591 | BAG32566.1 |
| AP009380      | PGN_0048  | conserved hypothetical protein                                                         |      | 59059   | 59475   | 417    | forward   | 0.505       | -0.985                             | 0.002                           | 0.013                                    | 0.314                                       | -3.134                                 | CDS  | GI:188593592 | BAG32567.1 |
| AP009380      | PGN_0049  | probable anti-restriction protein                                                      |      | 59447   | 60027   | 581    | forward   | 0.594       | 0.751                              | 0.056                           | 0.139                                    | 0.393                                       | -1.910                                 | CDS  | GI:188593593 | BAG32568.1 |
| AP009380      | PGN_0050  | conserved hypothetical protein                                                         |      | 60040   | 61318   | 1275   | forward   | 0.720       | -0.474                             | 0.219                           | 0.362                                    | 0.386                                       | -1.228                                 | CDS  | GI:188593594 | BAG32569.1 |
| AP009380      | PGN_0051  | conserved hypothetical protein                                                         |      | 61345   | 61599   | 255    | forward   | 0.751       | -0.413                             | 0.305                           | 0.453                                    | 0.403                                       | -1.026                                 | CDS  | GI:188593595 | BAG32570.1 |
| AP009380      | PGN_0052  | hypothetical protein                                                                   |      | 61604   | 61834   | 231    | forward   | 0.661       | -0.598                             | 0.134                           | 0.258                                    | 0.399                                       | -1.498                                 | CDS  | GI:188593596 | BAG32571.1 |
| AP009380      | PGN_0053  | conserved hypothetical protein                                                         |      | 62092   | 63318   | 1227   | forward   | 0.727       | -1.853                             | 0.000                           | 0.002                                    | 0.479                                       | -3.871                                 | CDS  | GI:188593597 | BAG32572.1 |
| AP009380      | PGN_0054  | hypothetical protein                                                                   |      | 63320   | 63724   | 405    | forward   | 0.216       | -2.213                             | 0.000                           | 0.000                                    | 0.472                                       | -4.689                                 | CDS  | GI:188593598 | BAG32573.1 |
| AP009380      | PGN_0055  | probable lysozyme                                                                      |      | 63785   | 64300   | 516    | reverse   | 0.197       | -2.345                             | 0.000                           | 0.000                                    | 0.423                                       | -5.545                                 | CDS  | GI:188593599 | BAG32574.1 |
| AP009380      | PGN_0056  | probable conserved protein found in conjugate transposon                               |      | 64284   | 64745   | 462    | reverse   | 0.625       | -0.678                             | 0.007                           | 0.034                                    | 0.253                                       | -2.678                                 | CDS  | GI:188593600 | BAG32575.1 |
| AP009380      | PGN_0057  | probable conserved protein found in conjugate transposon TraP                          | traP | 64770   | 65624   | 855    | reverse   | 0.530       | -0.916                             | 0.000                           | 0.005                                    | 0.263                                       | -3.482                                 | CDS  | GI:188593601 | BAG32576.1 |
| AP009380      | PGN_0058  | probable conserved protein found in conjugate transposon                               |      | 65624   | 66208   | 585    | reverse   | 0.466       | -1.102                             | 0.000                           | 0.003                                    | 0.307                                       | -3.592                                 | CDS  | GI:188593602 | BAG32577.1 |
| AP009380      | PGN_0059  | conserved protein found in conjugate transposon TraN                                   | traN | 66210   | 67130   | 921    | reverse   | 0.642       | -0.640                             | 0.018                           | 0.064                                    | 0.270                                       | -2.373                                 | CDS  | GI:188593603 | BAG32578.1 |
| AP009380      | PGN_0060  | conserved protein found in conjugate transposon TraM                                   | traM | 67169   | 68536   | 1368   | reverse   | 0.626       | -0.675                             | 0.003                           | 0.017                                    | 0.224                                       | -3.011                                 | CDS  | GI:188593604 | BAG32579.1 |
| AP009380      | PGN_0061  | hypothetical protein                                                                   |      | 68487   | 68819   | 333    | reverse   | 0.746       | -0.423                             | 0.137                           | 0.261                                    | 0.285                                       | -1.485                                 | CDS  | GI:188593605 | BAG32580.1 |
| AP009380      | PGN_0062  | putative conserved protein found in conjugate transposon TraK                          | traK | 68816   | 69439   | 624    | reverse   | 0.557       | -0.846                             | 0.000                           | 0.005                                    | 0.242                                       | -3.491                                 | CDS  | GI:188593606 | BAG32581.1 |
| AP009380      | PGN_0063  | conserved transmembrane protein found in conjugate transposon TraJ                     | traJ | 69459   | 70535   | 1077   | reverse   | 0.618       | -0.693                             | 0.008                           | 0.036                                    | 0.260                                       | -2.662                                 | CDS  | GI:188593607 | BAG32582.1 |
| AP009380      | PGN_0064  | putative conserved protein found in conjugate transposon TraI                          | traI | 70538   | 71167   | 630    | reverse   | 0.642       | -0.640                             | 0.023                           | 0.075                                    | 0.281                                       | -2.272                                 | CDS  | GI:188593608 | BAG32583.1 |
| AP009380      | PGN_0065  | conserved protein found in conjugate transposon TraG                                   | traG | 71302   | 73803   | 2502   | reverse   | 0.368       | -1.441                             | 0.000                           | 0.000                                    | 0.300                                       | -4.801                                 | CDS  | GI:188593609 | BAG32584.1 |
| AP009380      | PGN_0066  | probable conserved transmembrane protein found in conjugate transposon TraF            | traF | 73800   | 74177   | 378    | reverse   | 0.772       | -0.374                             | 0.205                           | 0.346                                    | 0.295                                       | -1.267                                 | CDS  | GI:188593610 | BAG32585.1 |
| AP009380      | PGN_0067  | probable conserved transmembrane protein found in conjugate transposon TraE            | traE | 74182   | 74881   | 300    | reverse   | 0.753       | -0.409                             |                                 |                                          |                                             |                                        |      |              |            |

|          |           |                                                                               |        |        |      |         |       |        |       |       |       |        |      |              |            |
|----------|-----------|-------------------------------------------------------------------------------|--------|--------|------|---------|-------|--------|-------|-------|-------|--------|------|--------------|------------|
| AP009380 | PGN_0079  | conserved hypothetical protein with DUF1016 domain                            | 83317  | 84354  | 1038 | forward | 0.498 | -1.005 | 0.015 | 0.056 | 0.412 | -2.440 | CDS  | GI:188593623 | BAG32598.1 |
| AP009380 | PGN_0080  | probable tetracycline resistance element mobilization regulatory protein RteC | 84397  | 84723  | 327  | reverse | 0.682 | -0.552 | 0.093 | 0.203 | 0.329 | -1.678 | CDS  | GI:188593624 | BAG32599.1 |
| AP009380 | PGN_0081  | putative Na driven multidrug efflux pump                                      | 85010  | 86368  | 1359 | reverse | 0.681 | -0.554 | 0.119 | 0.238 | 0.356 | -1.558 | CDS  | GI:188593625 | BAG32600.1 |
| AP009380 | PGN_0082  | probable transcriptional regulator AraC family                                | 86465  | 87313  | 849  | reverse | 0.545 | -0.877 | 0.006 | 0.029 | 0.317 | -2.766 | CDS  | GI:188593626 | BAG32601.1 |
| AP009380 | PGN_0083  | conserved hypothetical protein                                                | 87598  | 88992  | 1395 | forward | 0.976 | -0.034 | 0.879 | 0.925 | 0.227 | -0.152 | CDS  | GI:188593627 | BAG32602.1 |
| AP009380 | PGN_0084  | DNA topoisomerase I                                                           | 89027  | 91156  | 2130 | forward | 0.673 | -0.571 | 0.020 | 0.069 | 0.246 | -2.325 | CDS  | GI:188593628 | BAG32603.1 |
| AP009380 | PGN_0085  | hypothetical protein                                                          | 91296  | 91727  | 432  | forward | 0.922 | -0.117 | 0.705 | 0.798 | 0.310 | -0.379 | CDS  | GI:188593629 | BAG32604.1 |
| AP009380 | PGN_0086  | putative DNA methylase                                                        | 91714  | 97200  | 5487 | forward | 0.861 | -0.215 | 0.381 | 0.524 | 0.246 | -0.876 | CDS  | GI:188593630 | BAG32605.1 |
| AP009380 | PGN_0087  | conserved hypothetical protein                                                | 97257  | 99167  | 1911 | reverse | 0.515 | -0.957 | 0.006 | 0.030 | 0.347 | -2.756 | CDS  | GI:188593631 | BAG32606.1 |
| AP009380 | PGN_0088  | putative transcriptional regulator                                            | 99167  | 99376  | 210  | reverse | 0.555 | -0.850 | 0.036 | 0.103 | 0.405 | -2.096 | CDS  | GI:188593632 | BAG32607.1 |
| AP009380 | PGN_0089  | hypothetical protein                                                          | 99529  | 99849  | 321  | reverse | 0.875 | -0.193 | 0.505 | 0.638 | 0.290 | -0.666 | CDS  | GI:188593633 | BAG32608.1 |
| AP009380 | PGN_0090  | hypothetical protein                                                          | 99833  | 100186 | 354  | reverse | 1.037 | 0.052  | 0.878 | 0.925 | 0.339 | 0.154  | CDS  | GI:188593634 | BAG32609.1 |
| AP009380 | PGN_0091  | hypothetical protein                                                          | 100407 | 100685 | 279  | forward | 0.725 | -0.464 | 0.103 | 0.216 | 0.285 | -1.630 | CDS  | GI:188593635 | BAG32610.1 |
| AP009380 | PGN_0092  | conserved hypothetical protein                                                | 100714 | 101025 | 312  | forward | 0.584 | -0.776 | 0.006 | 0.032 | 0.285 | -2.728 | CDS  | GI:188593636 | BAG32611.1 |
| AP009380 | PGN_0093  | conserved hypothetical protein                                                | 101075 | 101440 | 366  | reverse | 1.207 | 0.272  | 0.231 | 0.373 | 0.227 | 1.197  | CDS  | GI:188593637 | BAG32612.1 |
| AP009380 | PGN_0094  | putative bacteriophage integrase                                              | 101455 | 102690 | 1236 | reverse | 1.362 | 0.446  | 0.052 | 0.132 | 0.230 | 1.942  | CDS  | GI:188593638 | BAG32613.1 |
| AP009380 | PGN_0095  | hypothetical protein                                                          | 102733 | 102882 | 150  | reverse | 0.666 | -0.587 | 0.013 | 0.051 | 0.236 | -2.487 | CDS  | GI:188593639 | BAG32614.1 |
| AP009380 | PGN_0096  | aspartate kinase                                                              | 103084 | 104424 | 1341 | reverse | 0.987 | -0.019 | 0.926 | 0.952 | 0.203 | -0.093 | CDS  | GI:188593640 | BAG32615.1 |
| AP009380 | PGN_0097  | putative cell-division ATP-binding protein                                    | 104442 | 105182 | 741  | reverse | 1.054 | 0.076  | 0.793 | 0.861 | 0.288 | 0.263  | CDS  | GI:188593641 | BAG32616.1 |
| AP009380 | PGN_0098  | hypothetical protein                                                          | 105346 | 105519 | 174  | reverse | 0.994 | -0.009 | 0.982 | 0.984 | 0.394 | -0.023 | CDS  | GI:188593642 | BAG32617.1 |
| AP009380 | PGN_0099  | probable peptidase                                                            | 105575 | 106588 | 1014 | forward | 1.300 | 0.379  | 0.261 | 0.407 | 0.337 | 1.125  | CDS  | GI:188593643 | BAG32618.1 |
| AP009380 | PGN_0100  | diaminopimelate decarboxylase                                                 | 106598 | 107746 | 1149 | forward | 0.870 | -0.202 | 0.618 | 0.729 | 0.404 | -0.499 | CDS  | GI:188593644 | BAG32619.1 |
| AP009380 | PGN_0101  | putative 1,4-dihydroxy-2-naphthoate octaprenyltransferase                     | 107736 | 108623 | 888  | forward | 0.848 | -0.239 | 0.282 | 0.430 | 0.222 | -1.075 | CDS  | GI:188593645 | BAG32620.1 |
| AP009380 | PGN_0102  | conserved hypothetical protein                                                | 108715 | 109095 | 381  | forward | 0.643 | -0.638 | 0.103 | 0.216 | 0.391 | -1.630 | CDS  | GI:188593646 | BAG32621.1 |
| AP009380 | PGN_0103  | putative TonB                                                                 | 109130 | 110446 | 1317 | forward | 0.698 | -0.519 | 0.190 | 0.328 | 0.396 | -1.311 | CDS  | GI:188593647 | BAG32622.1 |
| AP009380 | PGN_0104  | transposase in ISPg1                                                          | 111347 | 112432 | 1086 | reverse | 0.658 | -0.604 | 0.198 | 0.336 | 0.469 | -1.287 | CDS  | GI:188593648 | BAG32623.1 |
| AP009380 | PGN_0105  | conserved hypothetical protein                                                | 112565 | 112798 | 234  | forward | 0.357 | -1.487 | 0.010 | 0.043 | 0.579 | -2.568 | CDS  | GI:188593649 | BAG32624.1 |
| AP009380 | PGN_0106  | partial transposase in ISPg3                                                  | 113293 | 114081 | 789  | forward | 0.565 | -0.824 | 0.042 | 0.115 | 0.406 | -2.032 | CDS  | GI:188593650 | BAG32625.1 |
| AP009380 | PGN_0107  | partial transposase in ISPg3                                                  | 114121 | 114441 | 321  | forward | 0.756 | -0.403 | 0.309 | 0.457 | 0.396 | -1.017 | CDS  | GI:188593651 | BAG32626.1 |
| AP009380 | PGN_0108  | partial transposase in ISPg1                                                  | 114428 | 114859 | 432  | reverse | 0.701 | -0.512 | 0.224 | 0.366 | 0.422 | -1.215 | CDS  | GI:188593652 | BAG32627.1 |
| AP009380 | PGN_0109  | conserved hypothetical protein                                                | 114823 | 115275 | 453  | reverse | 0.825 | -0.277 | 0.408 | 0.547 | 0.335 | -0.828 | CDS  | GI:188593653 | BAG32628.1 |
| AP009380 | PGN_0110  | hypothetical protein                                                          | 115327 | 115455 | 129  | reverse | 0.731 | -0.452 | 0.167 | 0.299 | 0.327 | -1.382 | CDS  | GI:188593654 | BAG32629.1 |
| AP009380 | PGN_10004 | tRNA-Val                                                                      | 115467 | 115544 | 78   | reverse | 0.458 | -1.126 | 0.001 | 0.007 | 0.338 | -3.328 | tRNA |              |            |
| AP009380 | PGN_10005 | tRNA-Val                                                                      | 115587 | 115661 | 75   | reverse | 0.370 | -1.433 | 0.000 | 0.003 | 0.387 | -3.706 | tRNA |              |            |
| AP009380 | PGN_0111  | partial transposase in ISPg6                                                  | 115776 | 115976 | 201  | reverse | 0.477 | -1.069 | 0.007 | 0.032 | 0.395 | -2.709 | CDS  | GI:188593655 | BAG32630.1 |
| AP009380 | PGN_0112  | partial transposase Orl1 in ISPg5                                             | 116468 | 116686 | 219  | reverse | 0.596 | -0.746 | 0.009 | 0.041 | 0.287 | -2.598 | CDS  | GI:188593656 | BAG32631.1 |
| AP009380 | PGN_0113  | hypothetical protein                                                          | 116703 | 116849 | 147  | reverse | 1.097 | 0.133  | 0.744 | 0.823 | 0.408 | 0.326  | CDS  | GI:188593657 | BAG32632.1 |
| AP009380 | PGN_0114  | Na translocating NADH-quinone reductase subunit A                             | 117168 | 118523 | 1356 | forward | 1.659 | 0.730  | 0.000 | 0.004 | 0.268 | 3.519  | CDS  | GI:188593658 | BAG32633.1 |
| AP009380 | PGN_0115  | Na translocating NADH-quinone reductase subunit B                             | 118554 | 119753 | 1200 | forward | 1.608 | 0.685  | 0.003 | 0.018 | 0.230 | 2.983  | CDS  | GI:188593659 | BAG32634.1 |
| AP009380 | PGN_0116  | probable Na translocating NADH-quinone reductase subunit C                    | 119777 | 120511 | 735  | forward | 2.031 | 1.022  | 0.000 | 0.003 | 0.278 | 3.670  | CDS  | GI:188593660 | BAG32635.1 |
| AP009380 | PGN_0117  | putative Na translocating NADH-quinone reductase subunit D                    | 120517 | 121146 | 630  | forward | 1.989 | 0.992  | 0.000 | 0.002 | 0.259 | 3.838  | CDS  | GI:188593661 | BAG32636.1 |
| AP009380 | PGN_0118  | putative Na translocating NADH-quinone reductase subunit E                    | 121186 | 121800 | 615  | forward | 1.789 | 0.839  | 0.001 | 0.010 | 0.263 | 3.196  | CDS  | GI:188593662 | BAG32637.1 |
| AP009380 | PGN_0119  | Na translocating NADH-quinone reductase subunit F                             | 121819 | 123057 | 1239 | forward | 1.554 | 0.636  | 0.003 | 0.020 | 0.217 | 2.926  | CDS  | GI:188593663 | BAG32638.1 |
| AP009380 | PGN_10006 | tRNA-Met                                                                      | 123389 | 123463 | 75   | reverse | 0.279 | -1.841 | 0.000 | 0.002 | 0.484 | -3.807 | tRNA |              |            |
| AP009380 | PGN_0120  | conserved hypothetical protein                                                | 123989 | 124471 | 483  | forward | 1.235 | 0.304  | 0.266 | 0.413 | 0.274 | 1.112  | CDS  | GI:188593664 | BAG32639.1 |
| AP009380 | PGN_0121  | conserved hypothetical protein                                                | 124527 | 126272 | 1746 | forward | 1.311 | 0.391  | 0.032 | 0.096 | 0.183 | 2.140  | CDS  | GI:188593665 | BAG32640.1 |
| AP009380 | PGN_0122  | 28 kDa outer membrane protein Omp28                                           | 126292 | 127167 | 876  | reverse | 1.041 | 0.058  | 0.787 | 0.857 | 0.214 | 0.271  | CDS  | GI:188593666 | BAG32641.1 |
| AP009380 | PGN_0123  | conserved hypothetical protein                                                | 127167 | 127907 | 741  | forward | 0.528 | -0.922 | 0.005 | 0.027 | 0.329 | -2.800 | CDS  | GI:188593667 | BAG32642.1 |
| AP009380 | PGN_0124  | hypothetical protein                                                          | 127938 | 128045 | 108  | forward | 0.567 | -0.818 | 0.009 | 0.041 | 0.314 | -2.602 | CDS  | GI:188593668 | BAG32643.1 |
| AP009380 | PGN_0125  | D-isomer specific 2-hydroxyacid dehydrogenase family protein                  | 128126 | 129085 | 960  | forward | 0.993 | -0.010 | 0.966 | 0.975 | 0.245 | -0.042 | CDS  | GI:188593669 | BAG32644.1 |
| AP009380 | PGN_0126  | putative transmembrane glucose/galactose transporter                          | 129124 | 130413 | 1290 | forward | 1.017 | 0.024  | 0.916 | 0.949 | 0.228 | 0.106  | CDS  | GI:188593670 | BAG32645.1 |
| AP009380 | PGN_0127  | hypothetical protein                                                          | 130930 | 131103 | 174  | reverse | 0.884 | -0.179 | 0.744 | 0.823 | 0.546 | -0.327 | CDS  | GI:188593671 | BAG32646.1 |
| AP009380 | PGN_0128  | immunoreactive 53 kDa antigen                                                 | 131555 | 132994 | 1440 | reverse | 0.873 | -0.197 | 0.354 | 0.499 | 0.212 | -0.927 | CDS  | GI:188593672 | BAG32647.1 |
| AP009380 | PGN_0129  | conserved hypothetical protein                                                | 133035 | 133628 | 594  | reverse | 0.843 | -0.246 | 0.302 | 0.450 | 0.239 | -1.031 | CDS  | GI:188593673 | BAG32648.1 |
| AP009380 | PGN_0130  | partial transposase in ISPg1                                                  | 134082 | 134726 | 645  | reverse | 0.642 | -0.639 | 0.173 | 0.307 | 0.469 | -1.362 | CDS  | GI:188593674 | BAG32649.1 |
| AP009380 | PGN_0131  | partial transposase in ISPg1                                                  | 134772 | 135167 | 396  | reverse | 0.793 | -0.334 | 0.421 | 0.559 | 0.416 | -0.804 | CDS  | GI:188593675 | BAG32650.1 |
| AP009380 | PGN_0132  | conserved hypothetical protein                                                | 135438 | 135914 | 477  | reverse | 1.945 | 0.960  | 0.003 | 0.018 | 0.322 | 2.983  | CDS  | GI:188593676 | BAG32651.1 |
| AP009380 | PGN_0133  | adenosylmethionine-S-aminio-7-oxononanoate aminotransferase                   | 135926 | 137227 | 1302 | reverse | 1.238 | 0.308  | 0.321 | 0.472 | 0.310 | 0.992  | CDS  | GI:188593677 | BAG32652.1 |
| AP009380 | PGN_0134  | putative biotin synthetase                                                    | 137217 | 138275 | 1059 | reverse | 1.103 | 0.141  | 0.585 | 0.703 | 0.258 | 0.546  | CDS  | GI:188593678 | BAG32653.1 |
| AP009380 | PGN_0135  | putative H <sup>+</sup> /peptide symporter                                    | 138390 | 139931 | 1542 | reverse | 1.173 | 0.230  | 0.388 | 0.531 | 0.267 | 0.863  | CDS  | GI:188593679 | BAG32654.1 |
| AP009380 | PGN_0136  | conserved hypothetical protein                                                | 139557 | 141048 | 1092 | reverse | 1.050 | 0.070  | 0.737 | 0.818 | 0.209 | 0.336  | CDS  | GI:188593680 | BAG32655.1 |
| AP009380 | PGN_0137  | putative tryptophanyl-tRNA synthetase                                         | 142131 | 143114 | 984  | forward | 1.276 | 0.351  | 0.051 | 0.130 | 0.180 | 1.951  | CDS  | GI:188593681 | BAG32656.1 |
| AP009380 | PGN_0138  | conserved hypothetical protein                                                | 143169 | 143588 | 420  | forward | 1.183 | 0.243  | 0.305 | 0.452 | 0.236 | 1.027  | CDS  | GI:188593682 | BAG32657.1 |
| AP009380 | PGN_0139  | conserved hypothetical protein                                                | 143588 | 144061 | 474  | forward | 1.256 | 0.329  | 0.207 | 0.348 | 0.261 | 1.261  | CDS  | GI:188593683 | BAG32658.1 |
| AP009380 | PGN_0140  | peptide methionine sulfoxide reductase                                        | 144123 | 145181 | 1059 | forward | 1.607 | 0.684  | 0.019 | 0.066 | 0.291 | 2.355  | CDS  | GI:1885      |            |

|          |           |                                                     |        |        |              |       |        |       |       |       |        |      |              |            |
|----------|-----------|-----------------------------------------------------|--------|--------|--------------|-------|--------|-------|-------|-------|--------|------|--------------|------------|
| AP009380 | PGN_0162  | conserved hypothetical protein                      | 176666 | 177436 | 771 forward  | 0.450 | -1.151 | 0.000 | 0.003 | 0.314 | -3.664 | CDS  | GI:188593706 | BAG32681.1 |
| AP009380 | PGN_0163  | hypothetical protein                                | 177696 | 178004 | 309 forward  | 0.794 | -0.332 | 0.291 | 0.440 | 0.315 | -1.056 | CDS  | GI:188593707 | BAG32682.1 |
| AP009380 | PGN_0164  | conserved hypothetical protein                      | 178270 | 178503 | 234 reverse  | 0.687 | -0.541 | 0.214 | 0.356 | 0.435 | -1.242 | CDS  | GI:188593708 | BAG32683.1 |
| AP009380 | PGN_0165  | conserved hypothetical protein                      | 178645 | 178812 | 168 forward  | 0.805 | -0.314 | 0.445 | 0.584 | 0.411 | -0.764 | CDS  | GI:188593709 | BAG32684.1 |
| AP009380 | PGN_0166  | conserved hypothetical protein                      | 178991 | 179143 | 153 forward  | 0.720 | -0.474 | 0.256 | 0.401 | 0.417 | -1.137 | CDS  | GI:188593710 | BAG32685.1 |
| AP009380 | PGN_0167  | 30S ribosomal protein S16                           | 179295 | 179873 | 579 reverse  | 0.994 | -0.009 | 0.977 | 0.983 | 0.304 | -0.029 | CDS  | GI:188593711 | BAG32686.1 |
| AP009380 | PGN_0168  | lipopolysaccharide biosynthesis protein WbpB        | 180659 | 181630 | 972 forward  | 0.948 | -0.077 | 0.781 | 0.853 | 0.279 | -0.278 | CDS  | GI:188593712 | BAG32687.1 |
| AP009380 | PGN_0169  | probable metallo-beta-lactamase superfamily protein | 181748 | 182557 | 810 reverse  | 1.395 | 0.480  | 0.092 | 0.201 | 0.285 | 1.683  | CDS  | GI:188593713 | BAG32688.1 |
| AP009380 | PGN_0170  | L-asparaginase                                      | 182610 | 183623 | 1014 reverse | 1.651 | 0.723  | 0.006 | 0.029 | 0.261 | 2.769  | CDS  | GI:188593714 | BAG32689.1 |
| AP009380 | PGN_0171  | partial transposase in ISPg2                        | 183701 | 184012 | 312 reverse  | 1.336 | 0.418  | 0.257 | 0.403 | 0.369 | 1.134  | CDS  | GI:188593715 | BAG32690.1 |
| AP009380 | PGN_0172  | conserved hypothetical protein                      | 184006 | 184278 | 273 forward  | 0.771 | -0.376 | 0.053 | 0.133 | 0.194 | -1.936 | CDS  | GI:188593716 | BAG32691.1 |
| AP009380 | PGN_0173  | glyceraldehyde 3-phosphate dehydrogenase type I     | 184289 | 185299 | 1011 forward | 0.993 | -0.011 | 0.951 | 0.966 | 0.172 | -0.062 | CDS  | GI:188593717 | BAG32692.1 |
| AP009380 | PGN_0174  | probable transcriptional regulator AraC family      | 185439 | 186377 | 939 reverse  | 1.238 | 0.308  | 0.192 | 0.331 | 0.236 | 1.304  | CDS  | GI:188593718 | BAG32693.1 |
| AP009380 | PGN_0175  | conserved hypothetical protein                      | 186498 | 187172 | 675 reverse  | 1.146 | 0.196  | 0.391 | 0.532 | 0.229 | 0.858  | CDS  | GI:188593719 | BAG32694.1 |
| AP009380 | PGN_0176  | conserved hypothetical protein                      | 187169 | 187612 | 444 reverse  | 1.127 | 0.173  | 0.507 | 0.638 | 0.260 | 0.664  | CDS  | GI:188593720 | BAG32695.1 |
| AP009380 | PGN_0177  | hypothetical protein                                | 187634 | 187957 | 324 forward  | 0.556 | -0.848 | 0.033 | 0.097 | 0.397 | -2.135 | CDS  | GI:188593721 | BAG32696.1 |
| AP009380 | PGN_0178  | conserved hypothetical protein                      | 188162 | 188743 | 582 forward  | 0.393 | -1.348 | 0.001 | 0.007 | 0.402 | -3.350 | CDS  | GI:188593722 | BAG32697.1 |
| AP009380 | PGN_0179  | 60 kDa protein                                      | 188769 | 190241 | 1473 forward | 0.556 | -0.847 | 0.055 | 0.137 | 0.441 | -1.920 | CDS  | GI:188593723 | BAG32698.1 |
| AP009380 | PGN_0180  | FimA type I fimbriin                                | 190297 | 191448 | 1152 forward | 0.296 | -1.755 | 0.000 | 0.000 | 0.298 | -5.887 | CDS  | GI:188593724 | BAG32699.1 |
| AP009380 | PGN_0181  | conserved hypothetical protein                      | 191587 | 191943 | 357 forward  | 0.506 | -0.982 | 0.002 | 0.015 | 0.322 | -3.049 | CDS  | GI:188593725 | BAG32700.1 |
| AP009380 | PGN_0182  | conserved hypothetical protein                      | 192172 | 192498 | 327 forward  | 0.914 | -0.130 | 0.709 | 0.801 | 0.348 | -0.373 | CDS  | GI:188593726 | BAG32701.1 |
| AP009380 | PGN_0183  | minor component FimC                                | 192485 | 193873 | 1389 forward | 0.782 | -0.354 | 0.335 | 0.485 | 0.367 | -0.964 | CDS  | GI:188593727 | BAG32702.1 |
| AP009380 | PGN_0184  | minor component FimD                                | 193888 | 195900 | 2013 forward | 0.842 | -0.248 | 0.451 | 0.590 | 0.329 | -0.754 | CDS  | GI:188593728 | BAG32703.1 |
| AP009380 | PGN_0185  | minor component FimE                                | 195897 | 197549 | 1653 forward | 1.225 | 0.293  | 0.327 | 0.476 | 0.928 | 0.981  | CDS  | GI:188593729 | BAG32704.1 |
| AP009380 | PGN_0186  | hypothetical protein                                | 197572 | 197799 | 228 reverse  | 1.263 | 0.337  | 0.230 | 0.372 | 0.281 | 1.199  | CDS  | GI:188593730 | BAG32705.1 |
| AP009380 | PGN_0187  | conserved hypothetical protein                      | 198082 | 198633 | 552 forward  | 0.961 | -0.057 | 0.753 | 0.830 | 0.182 | -0.315 | CDS  | GI:188593731 | BAG32706.1 |
| AP009380 | PGN_0188  | 50S ribosomal protein L32                           | 198640 | 198825 | 186 forward  | 0.796 | -0.329 | 0.097 | 0.208 | 0.198 | -1.661 | CDS  | GI:188593732 | BAG32707.1 |
| AP009380 | PGN_0189  | beta-ketoacyl-acyl-carrier-protein synthase III     | 199005 | 200012 | 1008 forward | 1.370 | 0.454  | 0.161 | 0.291 | 0.324 | 1.403  | CDS  | GI:188593733 | BAG32708.1 |
| AP009380 | PGN_0190  | putative GTP-binding protein                        | 200091 | 200990 | 900 forward  | 1.971 | 0.979  | 0.017 | 0.063 | 0.411 | 2.384  | CDS  | GI:188593734 | BAG32709.1 |
| AP009380 | PGN_0191  | GTP-binding protein EngA                            | 201053 | 202366 | 1314 forward | 1.599 | 0.677  | 0.102 | 0.215 | 0.414 | 1.635  | CDS  | GI:188593735 | BAG32710.1 |
| AP009380 | PGN_0192  | conserved hypothetical protein                      | 202417 | 205716 | 3300 forward | 1.792 | 0.841  | 0.048 | 0.125 | 0.426 | 1.974  | CDS  | GI:188593736 | BAG32711.1 |
| AP009380 | PGN_0193  | putative polysaccharide deacetylase                 | 205717 | 206364 | 648 forward  | 1.970 | 0.978  | 0.035 | 0.101 | 0.464 | 2.109  | CDS  | GI:188593737 | BAG32712.1 |
| AP009380 | PGN_0194  | conserved hypothetical protein                      | 206390 | 207076 | 687 forward  | 2.059 | 1.042  | 0.036 | 0.103 | 0.496 | 2.098  | CDS  | GI:188593738 | BAG32713.1 |
| AP009380 | PGN_0195  | putative xanthine phosphoribosyltransferase         | 207275 | 207856 | 582 reverse  | 1.515 | 0.599  | 0.025 | 0.081 | 0.268 | 2.239  | CDS  | GI:188593739 | BAG32714.1 |
| AP009380 | PGN_0196  | xanthine/uracil permease                            | 207893 | 209230 | 1338 reverse | 1.672 | 0.742  | 0.010 | 0.042 | 0.287 | 2.586  | CDS  | GI:188593740 | BAG32715.1 |
| AP009380 | PGN_0197  | conserved hypothetical protein                      | 209391 | 210062 | 672 reverse  | 1.022 | 0.031  | 0.892 | 0.934 | 0.229 | 0.136  | CDS  | GI:188593741 | BAG32716.1 |
| AP009380 | PGN_0198  | conserved hypothetical protein                      | 210122 | 211627 | 1506 reverse | 1.420 | 0.506  | 0.028 | 0.087 | 0.230 | 2.196  | CDS  | GI:188593742 | BAG32717.1 |
| AP009380 | PGN_10008 | tRNA-Pro                                            | 212909 | 212984 | 76 forward   | 0.416 | -1.264 | 0.009 | 0.039 | 0.480 | -2.631 | tRNA |              |            |
| AP009380 | PGN_0199  | hypothetical protein                                | 213103 | 213288 | 186 reverse  | 1.548 | 0.630  | 0.001 | 0.007 | 0.189 | 3.342  | CDS  | GI:188593743 | BAG32718.1 |
| AP009380 | PGN_0200  | conserved hypothetical protein                      | 213315 | 214205 | 891 reverse  | 1.603 | 0.681  | 0.002 | 0.014 | 0.221 | 3.086  | CDS  | GI:188593744 | BAG32719.1 |
| AP009380 | PGN_0201  | conserved hypothetical protein with DUF558 domain   | 214251 | 214997 | 747 reverse  | 0.979 | -0.030 | 0.891 | 0.934 | 0.219 | -0.137 | CDS  | GI:188593745 | BAG32720.1 |
| AP009380 | PGN_0202  | probable leucine aminopeptidase precursor           | 215327 | 216328 | 1002 forward | 1.239 | 0.309  | 0.281 | 0.429 | 0.286 | 1.079  | CDS  | GI:188593746 | BAG32721.1 |
| AP009380 | PGN_0203  | probable SufE Fe/S-cluster-related protein          | 216352 | 216777 | 426 forward  | 1.600 | 0.678  | 0.011 | 0.045 | 0.266 | 2.549  | CDS  | GI:188593747 | BAG32722.1 |
| AP009380 | PGN_0204  | protoporphyrinogen oxidase                          | 216781 | 218178 | 1398 forward | 2.121 | 1.085  | 0.000 | 0.003 | 0.297 | 3.653  | CDS  | GI:188593748 | BAG32723.1 |
| AP009380 | PGN_0205  | conserved hypothetical protein                      | 219032 | 219931 | 900 reverse  | 1.822 | 0.865  | 0.050 | 0.129 | 0.442 | 1.957  | CDS  | GI:188593749 | BAG32724.1 |
| AP009380 | PGN_0206  | putative lipid A disaccharide synthase              | 219928 | 221079 | 1152 reverse | 2.491 | 1.316  | 0.000 | 0.002 | 0.352 | 3.736  | CDS  | GI:188593750 | BAG32725.1 |
| AP009380 | PGN_0207  | probable stationary-phase survival protein          | 221116 | 221886 | 771 reverse  | 2.648 | 1.405  | 0.000 | 0.000 | 0.274 | 5.127  | CDS  | GI:188593751 | BAG32726.1 |
| AP009380 | PGN_0208  | conserved hypothetical protein                      | 221883 | 222440 | 558 reverse  | 2.340 | 1.226  | 0.000 | 0.000 | 0.249 | 4.922  | CDS  | GI:188593752 | BAG32727.1 |
| AP009380 | PGN_0209  | glycyl-tRNA synthetase                              | 222437 | 223984 | 1548 reverse | 2.080 | 1.056  | 0.000 | 0.002 | 0.273 | 3.872  | CDS  | GI:188593753 | BAG32728.1 |
| AP009380 | PGN_0210  | transposase in ISPg1                                | 224297 | 225382 | 1086 forward | 0.907 | -0.140 | 0.758 | 0.834 | 0.455 | -0.308 | CDS  | GI:188593754 | BAG32729.1 |
| AP009380 | PGN_0211  | conserved hypothetical protein                      | 225616 | 226788 | 1173 forward | 0.687 | -0.543 | 0.086 | 0.190 | 0.316 | -1.719 | CDS  | GI:188593755 | BAG32730.1 |
| AP009380 | PGN_0212  | transposase in ISPg1                                | 226942 | 228027 | 1086 reverse | 0.609 | -0.716 | 0.138 | 0.261 | 0.482 | -1.485 | CDS  | GI:188593756 | BAG32731.1 |
| AP009380 | PGN_0213  | conserved hypothetical protein                      | 228170 | 228556 | 387 forward  | 0.514 | -0.961 | 0.058 | 0.142 | 0.507 | -1.896 | CDS  | GI:188593757 | BAG32732.1 |
| AP009380 | PGN_0214  | conserved hypothetical protein                      | 228667 | 228975 | 309 reverse  | 0.810 | -0.304 | 0.196 | 0.335 | 0.235 | -1.292 | CDS  | GI:188593758 | BAG32733.1 |
| AP009380 | PGN_0215  | conserved hypothetical protein                      | 228974 | 229342 | 369 forward  | 0.751 | -0.413 | 0.041 | 0.114 | 0.202 | -2.041 | CDS  | GI:188593759 | BAG32734.1 |
| AP009380 | PGN_0001  | 16S ribosomal RNA                                   | 229311 | 230785 | 1475 forward | 0.601 | -0.735 | 0.000 | 0.003 | 0.199 | -3.694 | rRNA |              |            |
| AP009380 | PGN_0216  | conserved hypothetical protein                      | 230898 | 231056 | 159 forward  | 0.903 | -0.148 | 0.499 | 0.633 | 0.219 | -0.675 | CDS  | GI:188593760 | BAG32735.1 |
| AP009380 | PGN_0217  | conserved hypothetical protein                      | 231183 | 231338 | 156 forward  | 1.095 | 0.132  | 0.518 | 0.648 | 0.203 | 0.647  | CDS  | GI:188593761 | BAG32736.1 |
| AP009380 | PGN_10009 | tRNA-Ile                                            | 231348 | 231421 | 74 forward   | 0.398 | -1.327 | 0.006 | 0.032 | 0.488 | -2.722 | tRNA |              |            |
| AP009380 | PGN_10010 | tRNA-Ala                                            | 231423 | 231499 | 77 forward   | 0.494 | -1.018 | 0.006 | 0.031 | 0.372 | -2.739 | tRNA |              |            |
| AP009380 | PGN_r0002 | 23S ribosomal RNA                                   | 231618 | 234450 | 2833 forward | 0.487 | -1.039 | 0.000 | 0.001 | 0.258 | -4.032 | rRNA |              |            |
| AP009380 | PGN_r0003 | 5S ribosomal RNA                                    | 234597 | 234704 | 108 forward  | 0.251 | -1.992 | 0.000 | 0.000 | 0.459 | -4.344 | rRNA |              |            |
| AP009380 | PGN_0218  | transposase in ISPg1                                | 235110 | 236195 | 1086 forward | 0.669 | -0.581 | 0.210 | 0.351 | 0.463 | -1.253 | CDS  | GI:188593762 | BAG32737.1 |
| AP009380 | PGN_0219  | partial transposase in ISPg1                        | 236434 | 237003 | 570 forward  | 0.577 | -0.793 | 0.107 | 0.220 | 0.492 | -1.613 | CDS  | GI:188593763 | BAG32738.1 |
| AP009380 | PGN_0220  | partial transposase in ISPg1                        | 237092 | 237517 | 426 forward  | 0.572 | -0.806 | 0.101 | 0.214 | 0.491 | -1.640 | CDS  | GI:188593764 | BAG32739.1 |
| AP009380 | PGN_0221  | DNA topoisomerase III                               | 237886 | 240018 | 2133 forward | 0.863 | -0.213 | 0.407 | 0.546 | 0.257 | -0.830 | CDS  | GI:188593765 | BAG32740.1 |
| AP009380 | PGN_0222  | conserved hypothetical protein                      | 240698 | 240988 | 291 reverse  | 0.775 | -0.369 | 0.325 | 0.474 | 0.375 | -0.984 | CDS  | GI:188593766 | BAG32741.1 |
| AP009380 | PGN_0223  | glycosyl transferase family 4                       | 241404 | 242510 | 1107 forward | 0.869 | -0.202 | 0.388 | 0.530 | 0.234 | -0.864 | CDS  |              |            |



|          |          |                                                            |        |        |              |       |        |       |       |       |        |     |              |            |
|----------|----------|------------------------------------------------------------|--------|--------|--------------|-------|--------|-------|-------|-------|--------|-----|--------------|------------|
| AP009380 | PGN_0243 | phosphoglycerate mutase                                    | 261930 | 262676 | 747 reverse  | 2.002 | 1.001  | 0.020 | 0.068 | 0.429 | 2.331  | CDS | GI:188593787 | BAG32762.1 |
| AP009380 | PGN_0244 | hypothetical protein                                       | 262690 | 262899 | 210 reverse  | 0.926 | -0.111 | 0.782 | 0.854 | 0.401 | -0.276 | CDS | GI:188593788 | BAG32763.1 |
| AP009380 | PGN_0245 | hypothetical protein                                       | 262960 | 264270 | 1311 reverse | 0.931 | -0.104 | 0.679 | 0.778 | 0.250 | -0.414 | CDS | GI:188593789 | BAG32764.1 |
| AP009380 | PGN_0246 | conserved hypothetical protein                             | 264267 | 265772 | 1506 reverse | 0.991 | -0.014 | 0.948 | 0.964 | 0.207 | -0.066 | CDS | GI:188593790 | BAG32765.1 |
| AP009380 | PGN_0247 | putative magnesium transporter                             | 265791 | 267143 | 1353 reverse | 0.686 | -0.545 | 0.066 | 0.157 | 0.297 | -1.836 | CDS | GI:188593791 | BAG32766.1 |
| AP009380 | PGN_0248 | putative dimethyladenosine transferase                     | 267175 | 267951 | 777 reverse  | 0.709 | -0.496 | 0.052 | 0.132 | 0.256 | -1.943 | CDS | GI:188593792 | BAG32767.1 |
| AP009380 | PGN_0249 | conserved hypothetical protein                             | 268082 | 269131 | 1050 forward | 1.138 | 0.186  | 0.497 | 0.632 | 0.274 | 0.679  | CDS | GI:188593793 | BAG32768.1 |
| AP009380 | PGN_0250 | aminoacyl-histidine dipeptidase                            | 269162 | 270616 | 1455 forward | 1.354 | 0.437  | 0.199 | 0.337 | 0.340 | 1.284  | CDS | GI:188593794 | BAG32769.1 |
| AP009380 | PGN_0251 | malonyl CoA-acyl carrier protein transacylase              | 270731 | 271612 | 882 forward  | 1.856 | 0.892  | 0.021 | 0.072 | 0.388 | 2.301  | CDS | GI:188593795 | BAG32770.1 |
| AP009380 | PGN_0252 | putative membrane-bound lytic murein transglycosylase D    | 271793 | 273139 | 1347 reverse | 2.063 | 1.045  | 0.001 | 0.008 | 0.317 | 3.292  | CDS | GI:188593796 | BAG32771.1 |
| AP009380 | PGN_0253 | conserved hypothetical protein                             | 273158 | 273865 | 708 reverse  | 1.115 | 0.158  | 0.515 | 0.646 | 0.242 | 0.651  | CDS | GI:188593797 | BAG32772.1 |
| AP009380 | PGN_0254 | putative ParB chromosome partitioning protein              | 273885 | 274754 | 870 reverse  | 1.054 | 0.076  | 0.704 | 0.798 | 0.201 | 0.380  | CDS | GI:188593798 | BAG32773.1 |
| AP009380 | PGN_0255 | putative ParA chromosome partitioning protein              | 274762 | 275538 | 777 reverse  | 1.499 | 0.584  | 0.015 | 0.057 | 0.240 | 2.432  | CDS | GI:188593799 | BAG32774.1 |
| AP009380 | PGN_0256 | hydrolase                                                  | 275754 | 276632 | 879 reverse  | 0.672 | -0.574 | 0.013 | 0.051 | 0.231 | -2.489 | CDS | GI:188593800 | BAG32775.1 |
| AP009380 | PGN_0257 | putative arginine deiminase                                | 276650 | 277675 | 1026 reverse | 0.917 | -0.124 | 0.635 | 0.744 | 0.262 | -0.475 | CDS | GI:188593801 | BAG32776.1 |
| AP009380 | PGN_0258 | hypothetical protein                                       | 277959 | 278345 | 387 reverse  | 0.984 | -0.023 | 0.936 | 0.956 | 0.293 | -0.080 | CDS | GI:188593802 | BAG32777.1 |
| AP009380 | PGN_0259 | conserved hypothetical protein                             | 278348 | 279055 | 708 reverse  | 1.029 | 0.041  | 0.893 | 0.934 | 0.303 | 0.135  | CDS | GI:188593803 | BAG32778.1 |
| AP009380 | PGN_0260 | conserved hypothetical protein                             | 279068 | 279607 | 540 reverse  | 0.996 | -0.006 | 0.979 | 0.983 | 0.242 | -0.026 | CDS | GI:188593804 | BAG32779.1 |
| AP009380 | PGN_0261 | sigma-54-dependent transcriptional regulator               | 279594 | 280847 | 1254 reverse | 1.200 | 0.263  | 0.354 | 0.499 | 0.283 | 0.928  | CDS | GI:188593805 | BAG32780.1 |
| AP009380 | PGN_0262 | conserved hypothetical protein                             | 280875 | 282143 | 1269 reverse | 1.050 | 0.070  | 0.788 | 0.858 | 0.262 | 0.269  | CDS | GI:188593806 | BAG32781.1 |
| AP009380 | PGN_0263 | putative Fe-S oxidoreductase                               | 282180 | 283484 | 1305 reverse | 0.928 | -0.108 | 0.720 | 0.808 | 0.301 | -0.358 | CDS | GI:188593807 | BAG32782.1 |
| AP009380 | PGN_0264 | signal recognition particle-docking protein                | 283481 | 284434 | 954 reverse  | 0.950 | -0.073 | 0.815 | 0.878 | 0.314 | -0.234 | CDS | GI:188593808 | BAG32783.1 |
| AP009380 | PGN_0265 | carboxynorspermidine decarboxylase                         | 284461 | 285597 | 1137 reverse | 1.073 | 0.101  | 0.741 | 0.821 | 0.306 | 0.330  | CDS | GI:188593809 | BAG32784.1 |
| AP009380 | PGN_0266 | aspartyl-tRNA synthetase                                   | 285607 | 287370 | 1764 reverse | 1.215 | 0.281  | 0.337 | 0.487 | 0.293 | 0.959  | CDS | GI:188593810 | BAG32785.1 |
| AP009380 | PGN_0267 | putative riboflavin biosynthesis protein                   | 287800 | 288792 | 993 reverse  | 0.728 | -0.459 | 0.071 | 0.165 | 0.254 | -1.803 | CDS | GI:188593811 | BAG32786.1 |
| AP009380 | PGN_0268 | protoporphyrinogen oxidase                                 | 288817 | 289698 | 882 forward  | 0.873 | -0.197 | 0.488 | 0.625 | 0.283 | -0.694 | CDS | GI:188593812 | BAG32787.1 |
| AP009380 | PGN_0269 | putative transcriptional regulatory protein                | 289695 | 290180 | 486 forward  | 0.819 | -0.287 | 0.303 | 0.451 | 0.279 | -1.030 | CDS | GI:188593813 | BAG32788.1 |
| AP009380 | PGN_0270 | probable amidophosphoribosyl-transferase                   | 290164 | 290904 | 741 forward  | 0.821 | -0.285 | 0.189 | 0.327 | 0.217 | -1.313 | CDS | GI:188593814 | BAG32789.1 |
| AP009380 | PGN_0271 | endopeptidase PepO                                         | 291034 | 293103 | 2070 reverse | 1.468 | 0.553  | 0.027 | 0.085 | 0.251 | 2.208  | CDS | GI:188593815 | BAG32790.1 |
| AP009380 | PGN_0272 | conserved hypothetical protein                             | 293122 | 294024 | 903 reverse  | 1.272 | 0.347  | 0.129 | 0.252 | 0.229 | 1.517  | CDS | GI:188593816 | BAG32791.1 |
| AP009380 | PGN_0273 | conserved hypothetical protein                             | 294206 | 294340 | 135 reverse  | 2.665 | 1.414  | 0.000 | 0.000 | 0.297 | 4.770  | CDS | GI:188593817 | BAG32792.1 |
| AP009380 | PGN_0274 | putative RNA polymerase sigma-70 factor ECF subfamily      | 294444 | 295025 | 582 reverse  | 1.815 | 0.860  | 0.001 | 0.006 | 0.252 | 3.409  | CDS | GI:188593818 | BAG32793.1 |
| AP009380 | PGN_0275 | phosphofruktokinase                                        | 295174 | 296823 | 1650 reverse | 0.684 | -0.547 | 0.057 | 0.141 | 0.288 | -1.902 | CDS | GI:188593819 | BAG32794.1 |
| AP009380 | PGN_0276 | hypothetical protein                                       | 297019 | 297333 | 315 reverse  | 0.846 | -0.241 | 0.388 | 0.531 | 0.279 | -0.863 | CDS | GI:188593820 | BAG32795.1 |
| AP009380 | PGN_0277 | putative heat shock protein 15                             | 297308 | 297745 | 438 reverse  | 0.930 | -0.104 | 0.653 | 0.759 | 0.233 | -0.449 | CDS | GI:188593821 | BAG32796.1 |
| AP009380 | PGN_0278 | putative peptidyl-tRNA hydrolase                           | 297751 | 298308 | 558 reverse  | 0.813 | -0.298 | 0.139 | 0.263 | 0.202 | -1.478 | CDS | GI:188593822 | BAG32797.1 |
| AP009380 | PGN_0279 | putative 50S ribosomal protein L25                         | 298449 | 299027 | 579 reverse  | 1.409 | 0.494  | 0.118 | 0.237 | 0.316 | 1.562  | CDS | GI:188593823 | BAG32798.1 |
| AP009380 | PGN_0280 | hypothetical protein                                       | 299185 | 299475 | 291 reverse  | 0.620 | -0.690 | 0.182 | 0.317 | 0.517 | -1.336 | CDS | GI:188593824 | BAG32799.1 |
| AP009380 | PGN_0281 | methionyl-tRNA synthetase                                  | 299637 | 301679 | 2043 forward | 1.159 | 0.213  | 0.348 | 0.497 | 0.227 | 0.939  | CDS | GI:188593825 | BAG32800.1 |
| AP009380 | PGN_0282 | 2',3'-cyclic-nucleotide 2'-phosphodiesterase precursor     | 301700 | 304481 | 1782 forward | 1.257 | 0.331  | 0.184 | 0.320 | 0.249 | 1.329  | CDS | GI:188593826 | BAG32801.1 |
| AP009380 | PGN_0283 | probable exonuclease                                       | 303478 | 303660 | 783 forward  | 1.553 | 0.635  | 0.031 | 0.094 | 0.295 | 2.152  | CDS | GI:188593827 | BAG32802.1 |
| AP009380 | PGN_0284 | probable transcriptional regulator                         | 304323 | 304676 | 354 reverse  | 0.773 | -0.372 | 0.359 | 0.503 | 0.406 | -0.918 | CDS | GI:188593828 | BAG32803.1 |
| AP009380 | PGN_0285 | pyridine nucleotide-disulphide oxidoreductase              | 304747 | 307227 | 2481 reverse | 0.849 | -0.236 | 0.266 | 0.413 | 0.212 | -1.112 | CDS | GI:188593829 | BAG32804.1 |
| AP009380 | PGN_0286 | hypothetical protein frame-shifted with PGN0285            | 307239 | 307562 | 324 reverse  | 0.262 | -1.930 | 0.000 | 0.003 | 0.536 | -3.598 | CDS | GI:188593830 | BAG32805.1 |
| AP009380 | PGN_0287 | Mfa1fimbriin                                               | 308593 | 310284 | 1692 forward | 0.270 | -1.887 | 0.000 | 0.000 | 0.196 | -9.641 | CDS | GI:188593831 | BAG32806.1 |
| AP009380 | PGN_0288 | conserved hypothetical protein                             | 310364 | 311338 | 975 forward  | 0.239 | -2.063 | 0.000 | 0.000 | 0.289 | -7.150 | CDS | GI:188593832 | BAG32807.1 |
| AP009380 | PGN_0289 | conserved hypothetical protein                             | 311639 | 312979 | 1341 forward | 0.281 | -1.834 | 0.000 | 0.000 | 0.269 | -6.826 | CDS | GI:188593833 | BAG32808.1 |
| AP009380 | PGN_0290 | immunoreactive 32 kDa antigen                              | 312988 | 313989 | 1002 forward | 0.342 | -1.547 | 0.000 | 0.000 | 0.297 | -5.202 | CDS | GI:188593834 | BAG32809.1 |
| AP009380 | PGN_0291 | conserved hypothetical protein                             | 314139 | 317825 | 3687 forward | 0.341 | -1.550 | 0.000 | 0.000 | 0.245 | -6.329 | CDS | GI:188593835 | BAG32810.1 |
| AP009380 | PGN_0292 | hypothetical protein                                       | 318212 | 318334 | 123 forward  | 0.286 | -1.807 | 0.000 | 0.000 | 0.246 | -7.340 | CDS | GI:188593836 | BAG32811.1 |
| AP009380 | PGN_0293 | receptor antigen A                                         | 318767 | 321877 | 3111 forward | 1.327 | 0.408  | 0.135 | 0.258 | 0.273 | 1.496  | CDS | GI:188593837 | BAG32812.1 |
| AP009380 | PGN_0294 | receptor antigen B                                         | 321911 | 323422 | 1512 forward | 1.497 | 0.582  | 0.078 | 0.177 | 0.331 | 1.761  | CDS | GI:188593838 | BAG32813.1 |
| AP009380 | PGN_0295 | C-terminal domain of Arg- and Lys-gingipain proteinase     | 323591 | 324472 | 882 forward  | 1.100 | 0.138  | 0.725 | 0.809 | 0.391 | 0.352  | CDS | GI:188593839 | BAG32814.1 |
| AP009380 | PGN_0296 | conserved hypothetical protein                             | 324678 | 325841 | 1164 forward | 0.907 | -0.141 | 0.580 | 0.700 | 0.255 | -0.553 | CDS | GI:188593840 | BAG32815.1 |
| AP009380 | PGN_0297 | conserved hypothetical protein                             | 326030 | 326737 | 708 forward  | 1.025 | 0.035  | 0.861 | 0.911 | 0.202 | 0.175  | CDS | GI:188593841 | BAG32816.1 |
| AP009380 | PGN_0298 | putative undecaprenyl diphosphate synthase                 | 326815 | 327579 | 765 forward  | 1.004 | 0.005  | 0.979 | 0.983 | 0.210 | 0.026  | CDS | GI:188593842 | BAG32817.1 |
| AP009380 | PGN_0299 | putative outer membrane protein                            | 327597 | 330272 | 2676 forward | 1.107 | 0.147  | 0.529 | 0.656 | 0.233 | 0.630  | CDS | GI:188593843 | BAG32818.1 |
| AP009380 | PGN_0300 | conserved hypothetical protein                             | 330329 | 330853 | 525 forward  | 0.890 | -0.168 | 0.352 | 0.498 | 0.180 | -0.931 | CDS | GI:188593844 | BAG32819.1 |
| AP009380 | PGN_0301 | conserved hypothetical protein                             | 330888 | 331379 | 492 forward  | 1.095 | 0.131  | 0.590 | 0.707 | 0.242 | 0.540  | CDS | GI:188593845 | BAG32820.1 |
| AP009380 | PGN_0302 | rubrerythrin                                               | 331708 | 332286 | 579 forward  | 0.522 | -0.939 | 0.016 | 0.059 | 0.388 | -2.418 | CDS | GI:188593846 | BAG32821.1 |
| AP009380 | PGN_0303 | putative zinc protease                                     | 332564 | 335389 | 2826 forward | 0.944 | -0.084 | 0.725 | 0.809 | 0.238 | -0.351 | CDS | GI:188593847 | BAG32822.1 |
| AP009380 | PGN_0304 | conserved hypothetical protein                             | 335560 | 335721 | 162 forward  | 0.452 | -1.145 | 0.013 | 0.051 | 0.460 | -2.487 | CDS | GI:188593848 | BAG32823.1 |
| AP009380 | PGN_0305 | conserved hypothetical protein                             | 335938 | 336096 | 159 forward  | 0.600 | -0.738 | 0.122 | 0.242 | 0.478 | -1.545 | CDS | GI:188593849 | BAG32824.1 |
| AP009380 | PGN_0306 | conserved hypothetical protein                             | 336239 | 337081 | 843 forward  | 0.486 | -1.041 | 0.000 | 0.000 | 0.232 | -4.497 | CDS | GI:188593850 | BAG32825.1 |
| AP009380 | PGN_0307 | conserved hypothetical protein                             | 337034 | 337759 | 726 reverse  | 0.896 | -0.159 | 0.586 | 0.704 | 0.292 | -0.545 | CDS | GI:188593851 | BAG32826.1 |
| AP009380 | PGN_0308 | conserved hypothetical protein                             | 337731 | 337961 | 231 reverse  | 0.726 | -0.462 | 0.248 | 0.393 | 0.400 | -1.155 | CDS | GI:188593852 | BAG32827.1 |
| AP009380 | PGN_0309 | probable ribonuclease P protein component                  | 337967 | 338380 | 414 reverse  | 0.851 | -0.233 | 0.296 | 0.443 | 0.223 | -1.046 | CDS | GI:188593853 | BAG32828.1 |
| AP009380 | PGN_0310 | putative uroporphyrinogen-III synthase                     | 338377 | 339123 | 747 reverse  | 0.638 | -0.647 | 0.006 | 0.030 | 0.235 | -2.753 | CDS | GI:188593854 | BAG32829.1 |
| AP009380 | PGN_0311 | conserved hypothetical protein                             | 339114 | 339821 | 708 reverse  | 0.980 | -0.029 | 0.894 | 0.935 | 0.219 | -0.133 | CDS | GI:188593855 | BAG32830.1 |
| AP009380 | PGN_0312 | hypothetical protein                                       | 339872 | 340117 | 246 reverse  | 1.176 | 0.234  | 0.371 | 0.514 | 0.262 | 0.895  | CDS | GI:188593856 | BAG32831.1 |
| AP009380 | PGN_0313 | peptide chain release factor 3                             | 340123 | 341703 | 1581 reverse | 1.432 | 0.518  | 0.038 | 0.107 | 0.249 | 2.076  | CDS | GI:188593857 | BAG32832.1 |
| AP009380 | PGN_0314 | probable formate/nitrite transporter                       | 342110 | 342895 | 786 forward  | 2.177 | 1.123  | 0.017 | 0.063 | 0.471 | 2.383  | CDS | GI:188593858 | BAG32833.1 |
| AP009380 | PGN_0315 | precorrin-6x reductase/cobalamin biosynthetic protein CbiD | 342990 | 344798 | 1809 reverse | 3.314 | 1.729  | 0.000 | 0.001 | 0.425 | 4.071  | CDS | GI:188593859 | BAG32834.1 |
| AP009380 | PGN_0316 | precorrin-4 C11-methyltransferase                          | 344795 | 346639 | 1845 reverse | 2.567 | 1.3    |       |       |       |        |     |              |            |

|          |           |                                                                         |        |        |      |         |       |        |       |       |       |        |      |              |            |
|----------|-----------|-------------------------------------------------------------------------|--------|--------|------|---------|-------|--------|-------|-------|-------|--------|------|--------------|------------|
| AP009380 | PGN_0330  | DNA repair protein                                                      | 361249 | 362634 | 1386 | reverse | 1.599 | 0.677  | 0.018 | 0.065 | 0.287 | 2.359  | CDS  | GI:188593874 | BAG32849.1 |
| AP009380 | PGN_0331  | conserved hypothetical protein                                          | 362680 | 363564 | 885  | reverse | 1.314 | 0.394  | 0.127 | 0.249 | 0.259 | 1.525  | CDS  | GI:188593875 | BAG32850.1 |
| AP009380 | PGN_0332  | conserved hypothetical protein                                          | 363578 | 363982 | 405  | forward | 1.026 | 0.038  | 0.884 | 0.928 | 0.258 | 0.146  | CDS  | GI:188593876 | BAG32851.1 |
| AP009380 | PGN_0333  | putative transaldolase                                                  | 364085 | 364747 | 663  | forward | 1.009 | 0.012  | 0.941 | 0.959 | 0.167 | 0.075  | CDS  | GI:188593877 | BAG32852.1 |
| AP009380 | PGN_0334  | conserved hypothetical protein with DUF1343 domain                      | 364744 | 366042 | 1299 | forward | 1.418 | 0.504  | 0.039 | 0.109 | 0.244 | 2.065  | CDS  | GI:188593878 | BAG32853.1 |
| AP009380 | PGN_0335  | conserved hypothetical protein with Zinc carboxypeptidase domain        | 366121 | 368586 | 2466 | reverse | 1.362 | 0.445  | 0.208 | 0.348 | 0.353 | 1.260  | CDS  | GI:188593879 | BAG32854.1 |
| AP009380 | PGN_0336  | immunoreactive 23 kDa antigen                                           | 369407 | 370030 | 624  | reverse | 1.609 | 0.686  | 0.071 | 0.164 | 0.379 | 1.808  | CDS  | GI:188593880 | BAG32855.1 |
| AP009380 | PGN_0337  | conserved hypothetical protein                                          | 370232 | 370390 | 159  | reverse | 1.444 | 0.531  | 0.362 | 0.506 | 0.582 | 0.912  | CDS  | GI:188593881 | BAG32856.1 |
| AP009380 | PGN_0338  | hypothetical protein                                                    | 370525 | 370725 | 201  | reverse | 1.242 | 0.313  | 0.596 | 0.713 | 0.591 | 0.530  | CDS  | GI:188593882 | BAG32857.1 |
| AP009380 | PGN_0339  | hypothetical protein                                                    | 370817 | 370948 | 132  | forward | 0.669 | -0.581 | 0.326 | 0.476 | 0.592 | -0.981 | CDS  | GI:188593883 | BAG32858.1 |
| AP009380 | PGN_0340  | carboxyl-terminal processing protease                                   | 370966 | 372567 | 1602 | forward | 1.088 | 0.122  | 0.648 | 0.754 | 0.267 | 0.457  | CDS  | GI:188593884 | BAG32859.1 |
| AP009380 | PGN_0341  | conserved hypothetical protein                                          | 372639 | 374159 | 1521 | forward | 1.592 | 0.671  | 0.017 | 0.062 | 0.281 | 2.387  | CDS  | GI:188593885 | BAG32860.1 |
| AP009380 | PGN_0342  | putative uracil-DNA glycosylase                                         | 374193 | 374861 | 669  | forward | 2.531 | 1.340  | 0.000 | 0.000 | 0.205 | 6.523  | CDS  | GI:188593886 | BAG32861.1 |
| AP009380 | PGN_0343  | hypothetical protein                                                    | 375660 | 375797 | 138  | reverse | 1.707 | 0.772  | 0.067 | 0.158 | 0.422 | 1.829  | CDS  | GI:188593887 | BAG32862.1 |
| AP009380 | PGN_0344  | probable haloacid dehalogenase-like hydrolase                           | 375803 | 376618 | 816  | reverse | 2.118 | 1.083  | 0.001 | 0.007 | 0.323 | 3.347  | CDS  | GI:188593888 | BAG32863.1 |
| AP009380 | PGN_0345  | conserved hypothetical protein                                          | 376767 | 377621 | 855  | reverse | 1.324 | 0.404  | 0.105 | 0.218 | 0.249 | 1.621  | CDS  | GI:188593889 | BAG32864.1 |
| AP009380 | PGN_0346  | putative methyltransferase                                              | 377666 | 378367 | 702  | reverse | 1.133 | 0.180  | 0.521 | 0.651 | 0.280 | 0.642  | CDS  | GI:188593890 | BAG32865.1 |
| AP009380 | PGN_0347  | conserved hypothetical protein                                          | 378383 | 378859 | 477  | reverse | 0.703 | -0.509 | 0.045 | 0.121 | 0.254 | -2.001 | CDS  | GI:188593891 | BAG32866.1 |
| AP009380 | PGN_0348  | putative universal stress protein UspA                                  | 379179 | 380291 | 1113 | reverse | 0.968 | -0.047 | 0.926 | 0.952 | 0.503 | -0.092 | CDS  | GI:188593892 | BAG32867.1 |
| AP009380 | PGN_0349  | upregulated in stationary phase protein A                               | 380456 | 380710 | 255  | reverse | 0.781 | -0.357 | 0.386 | 0.529 | 0.412 | -0.867 | CDS  | GI:188593893 | BAG32868.1 |
| AP009380 | PGN_0350  | probable translation initiation factor SUI1                             | 380917 | 381249 | 333  | reverse | 0.986 | -0.021 | 0.954 | 0.969 | 0.359 | -0.057 | CDS  | GI:188593894 | BAG32869.1 |
| AP009380 | PGN_0351  | pyruvate carboxylase subunit B                                          | 381346 | 383205 | 1860 | reverse | 0.910 | -0.136 | 0.665 | 0.766 | 0.315 | -0.433 | CDS  | GI:188593895 | BAG32870.1 |
| AP009380 | PGN_0352  | conserved hypothetical protein                                          | 383312 | 383488 | 177  | reverse | 0.558 | -0.842 | 0.005 | 0.025 | 0.298 | -2.829 | CDS  | GI:188593896 | BAG32871.1 |
| AP009380 | PGN_0353  | conserved hypothetical protein                                          | 384064 | 384522 | 459  | forward | 0.932 | -0.102 | 0.662 | 0.764 | 0.234 | -0.437 | CDS  | GI:188593897 | BAG32872.1 |
| AP009380 | PGN_0354  | putative nitrogen utilization substance protein A                       | 384569 | 385903 | 1335 | forward | 1.339 | 0.421  | 0.108 | 0.222 | 0.262 | 1.607  | CDS  | GI:188593898 | BAG32873.1 |
| AP009380 | PGN_0355  | translation initiation factor IF-2                                      | 385999 | 388938 | 2940 | forward | 1.349 | 0.431  | 0.101 | 0.214 | 0.263 | 1.640  | CDS  | GI:188593899 | BAG32874.1 |
| AP009380 | PGN_0356  | conserved hypothetical protein                                          | 388966 | 389457 | 492  | forward | 1.187 | 0.247  | 0.249 | 0.393 | 0.214 | 1.154  | CDS  | GI:188593900 | BAG32875.1 |
| AP009380 | PGN_0357  | ABC transporter membrane protein                                        | 389491 | 390936 | 1446 | forward | 1.641 | 0.714  | 0.002 | 0.012 | 0.226 | 3.160  | CDS  | GI:188593901 | BAG32876.1 |
| AP009380 | PGN_0358  | putative ABC transporter ATP-binding protein                            | 390976 | 391728 | 753  | forward | 1.571 | 0.652  | 0.007 | 0.033 | 0.242 | 2.693  | CDS  | GI:188593902 | BAG32877.1 |
| AP009380 | PGN_0359  | putative ABC transporter permease protein                               | 391735 | 393078 | 1344 | forward | 1.574 | 0.655  | 0.026 | 0.083 | 0.294 | 2.224  | CDS  | GI:188593903 | BAG32878.1 |
| AP009380 | PGN_0360  | tyrosyl-tRNA synthetase                                                 | 394043 | 395335 | 1293 | forward | 1.253 | 0.325  | 0.080 | 0.180 | 0.186 | 1.751  | CDS  | GI:188593904 | BAG32879.1 |
| AP009380 | PGN_0361  | putative glycosyl transferase family 2                                  | 395355 | 396422 | 1068 | forward | 1.114 | 0.156  | 0.482 | 0.619 | 0.222 | 0.704  | CDS  | GI:188593905 | BAG32880.1 |
| AP009380 | PGN_0362  | hypothetical protein                                                    | 396600 | 396725 | 126  | reverse | 1.334 | 0.416  | 0.353 | 0.498 | 0.447 | 0.929  | CDS  | GI:188593906 | BAG32881.1 |
| AP009380 | PGN_0363  | conserved hypothetical protein                                          | 396722 | 396916 | 195  | reverse | 1.036 | 0.052  | 0.928 | 0.953 | 0.573 | 0.090  | CDS  | GI:188593907 | BAG32882.1 |
| AP009380 | PGN_0364  | hypothetical protein                                                    | 397291 | 397491 | 201  | reverse | 0.460 | -1.120 | 0.028 | 0.087 | 0.510 | -2.197 | CDS  | GI:188593908 | BAG32883.1 |
| AP009380 | PGN_0365  | arginyl-tRNA synthetase                                                 | 397663 | 399456 | 1794 | forward | 0.748 | -0.419 | 0.186 | 0.322 | 0.316 | -1.324 | CDS  | GI:188593909 | BAG32884.1 |
| AP009380 | PGN_0366  | putative tRNA 5-methylaminomethyl-2-thiouridylylase 5-methyltransferase | 399461 | 400546 | 1086 | forward | 0.847 | -0.240 | 0.396 | 0.537 | 0.283 | -0.848 | CDS  | GI:188593910 | BAG32885.1 |
| AP009380 | PGN_0367  | exodeoxyribonuclease III                                                | 400591 | 401355 | 765  | forward | 0.990 | -0.015 | 0.938 | 0.958 | 0.192 | -0.078 | CDS  | GI:188593911 | BAG32886.1 |
| AP009380 | PGN_0368  | redox-sensitive transcriptional activator OxyR                          | 401428 | 402354 | 927  | forward | 1.154 | 0.207  | 0.357 | 0.502 | 0.225 | 0.921  | CDS  | GI:188593912 | BAG32887.1 |
| AP009380 | PGN_0369  | probable single-stranded binding protein                                | 402405 | 402875 | 471  | forward | 0.769 | -0.379 | 0.135 | 0.258 | 0.253 | -1.496 | CDS  | GI:188593913 | BAG32888.1 |
| AP009380 | PGN_0370  | conserved hypothetical protein                                          | 402893 | 404221 | 1329 | forward | 1.110 | 0.150  | 0.625 | 0.735 | 0.306 | 0.489  | CDS  | GI:188593914 | BAG32889.1 |
| AP009380 | PGN_0371  | conserved hypothetical protein                                          | 404257 | 404853 | 597  | forward | 1.237 | 0.306  | 0.298 | 0.446 | 0.294 | 1.041  | CDS  | GI:188593915 | BAG32890.1 |
| AP009380 | PGN_0372  | hypothetical protein                                                    | 404909 | 405001 | 93   | forward | 1.115 | 0.157  | 0.605 | 0.718 | 0.303 | 0.518  | CDS  | GI:188593916 | BAG32891.1 |
| AP009380 | PGN_0373  | putative thioredoxin                                                    | 405469 | 405978 | 510  | reverse | 1.218 | 0.284  | 0.253 | 0.399 | 0.248 | 1.144  | CDS  | GI:188593917 | BAG32892.1 |
| AP009380 | PGN_0374  | conserved hypothetical protein                                          | 406116 | 407243 | 1128 | reverse | 0.751 | -0.412 | 0.045 | 0.120 | 0.205 | -2.007 | CDS  | GI:188593918 | BAG32893.1 |
| AP009380 | PGN_0375  | phosphoribulose/uridine kinase                                          | 407334 | 408998 | 1665 | forward | 0.791 | -0.338 | 0.353 | 0.499 | 0.364 | -0.928 | CDS  | GI:188593919 | BAG32894.1 |
| AP009380 | PGN_0376  | 2-dehydro-3-deoxyphosphonate aldolase                                   | 410086 | 410984 | 819  | forward | 1.196 | 0.258  | 0.258 | 0.405 | 0.228 | 1.131  | CDS  | GI:188593920 | BAG32895.1 |
| AP009380 | PGN_0377  | aspartate ammonia-lyase                                                 | 411152 | 412579 | 1428 | forward | 1.333 | 0.414  | 0.138 | 0.261 | 0.279 | 1.485  | CDS  | GI:188593921 | BAG32896.1 |
| AP009380 | PGN_0378  | putative exopolyphosphatase                                             | 412726 | 413634 | 909  | forward | 0.851 | -0.234 | 0.230 | 0.372 | 0.194 | -1.201 | CDS  | GI:188593922 | BAG32897.1 |
| AP009380 | PGN_0379  | conserved hypothetical protein                                          | 413733 | 414665 | 933  | forward | 1.143 | 0.192  | 0.530 | 0.657 | 0.307 | 0.627  | CDS  | GI:188593923 | BAG32898.1 |
| AP009380 | PGN_0380  | partial RDK family transcriptional repressor with glucose kinase domain | 414732 | 415511 | 780  | forward | 1.538 | 0.621  | 0.004 | 0.021 | 0.214 | 2.908  | CDS  | GI:188593924 | BAG32899.1 |
| AP009380 | PGN_0381  | partial RDK family transcriptional repressor with glucose kinase domain | 415480 | 415938 | 459  | forward | 1.878 | 0.909  | 0.000 | 0.003 | 0.251 | 3.621  | CDS  | GI:188593925 | BAG32900.1 |
| AP009380 | PGN_0382  | conserved hypothetical protein                                          | 415923 | 416477 | 555  | forward | 1.000 | 0.000  | 1.000 | 1.000 | 0.234 | 0.000  | CDS  | GI:188593926 | BAG32901.1 |
| AP009380 | PGN_0383  | probable transporter                                                    | 416474 | 417385 | 912  | forward | 1.237 | 0.307  | 0.292 | 0.441 | 0.291 | 1.053  | CDS  | GI:188593927 | BAG32902.1 |
| AP009380 | PGN_0384  | conserved hypothetical protein                                          | 417382 | 417819 | 438  | forward | 1.995 | 0.996  | 0.007 | 0.033 | 0.369 | 2.702  | CDS  | GI:188593928 | BAG32903.1 |
| AP009380 | PGN_0385  | putative integrase/recombinase XerD                                     | 417859 | 418785 | 927  | reverse | 1.053 | 0.074  | 0.773 | 0.847 | 0.257 | 0.288  | CDS  | GI:188593929 | BAG32904.1 |
| AP009380 | PGN_0386  | probable 3-dehydroquinone dehydratase type II                           | 418903 | 419328 | 426  | forward | 0.736 | -0.441 | 0.045 | 0.119 | 0.220 | -2.009 | CDS  | GI:188593930 | BAG32905.1 |
| AP009380 | PGN_0387  | putative O-methyltransferase                                            | 419429 | 420079 | 651  | forward | 1.050 | 0.070  | 0.789 | 0.858 | 0.261 | 0.268  | CDS  | GI:188593931 | BAG32906.1 |
| AP009380 | PGN_0388  | putative thiol peroxidase                                               | 420125 | 420664 | 540  | forward | 0.827 | -0.274 | 0.279 | 0.427 | 0.253 | -1.082 | CDS  | GI:188593932 | BAG32907.1 |
| AP009380 | PGN_0389  | putative cytidine/deoxycytidylate deaminase                             | 420860 | 421339 | 480  | reverse | 1.707 | 0.772  | 0.008 | 0.037 | 0.292 | 2.646  | CDS  | GI:188593933 | BAG32908.1 |
| AP009380 | PGN_0390  | conserved hypothetical protein                                          | 421385 | 422248 | 864  | reverse | 1.480 | 0.565  | 0.047 | 0.123 | 0.285 | 1.986  | CDS  | GI:188593934 | BAG32909.1 |
| AP009380 | PGN_0391  | conserved hypothetical protein                                          | 422258 | 423676 | 1419 | reverse | 0.945 | -0.082 | 0.697 | 0.792 | 0.212 | -0.389 | CDS  | GI:188593935 | BAG32910.1 |
| AP009380 | PGN_0392  | conserved hypothetical protein with competence-damaged protein domain   | 423709 | 424191 | 483  | reverse | 0.494 | -1.017 | 0.002 | 0.016 | 0.336 | -3.029 | CDS  | GI:188593936 | BAG32911.1 |
| AP009380 | PGN_0393  | putative O-sialoglycoprotein endopeptidase                              | 424191 | 425216 | 1026 | reverse | 0.655 | -0.609 | 0.006 | 0.032 | 0.224 | -2.723 | CDS  | GI:188593937 | BAG32912.1 |
| AP009380 | PGN_10011 | tRNA-Glu                                                                | 425498 | 425569 | 72   | reverse | 0.360 | -1.475 | 0.001 | 0.005 | 0.425 | -3.473 | tRNA |              |            |
| AP009380 | PGN_0394  | probable 30S ribosomal protein S20                                      | 425634 | 425888 | 255  | reverse | 0.627 | -0.673 | 0.004 | 0.022 | 0.232 | -2.899 | CDS  | GI:188593938 | BAG32913.1 |
| AP009380 | PGN_10012 | tRNA-Glu                                                                | 425918 | 425989 | 72   | reverse | 0.358 | -1.481 | 0.000 | 0.003 | 0.406 | -3.650 | tRNA |              |            |
| AP009380 | PGN_0395  | conserved hypothetical protein                                          | 426069 | 426374 | 306  | forward | 0.844 | -0.245 | 0.406 | 0.546 | 0.295 | -0.830 | CDS  | GI:188593939 | BAG32914.1 |
| AP009380 | PGN_0396  | ribonuclease R                                                          | 426565 | 428760 | 2196 | reverse | 2.346 | 1.230  | 0.001 | 0.005 | 0.357 | 3.446  | CDS  | GI:188593940 | BAG32915.1 |
| AP009380 | PGN_0397  | putative auin-regulated protein                                         | 428813 | 430342 | 1530 | reverse | 1.885 | 0.915  | 0.001 | 0.006 | 0.270 | 3.389  | CDS  | GI:188593941 | BAG32916.1 |
| AP009380 | PGN_0398  | ABC transporter ATP-binding protein MsdA family                         | 430358 | 432175 | 1818 | reverse | 1.518 | 0.603  | 0.006 | 0.029 | 0.217 | 2.772  | CDS  | GI:188593942 | BAG32917.1 |
| AP009380 | PGN_0399  | conserved hypothetical protein                                          | 432200 | 432475 | 276  | forward | 1.108 | 0.148  | 0.655 | 0.759 |       |        |      |              |            |

|          |           |                                                                                            |        |        |              |       |        |       |       |       |        |      |              |            |
|----------|-----------|--------------------------------------------------------------------------------------------|--------|--------|--------------|-------|--------|-------|-------|-------|--------|------|--------------|------------|
| AP009380 | PGN_0415  | restriction endonuclease                                                                   | 452503 | 456477 | 3975 reverse | 1.201 | 0.264  | 0.170 | 0.303 | 0.192 | 1.372  | CDS  | GI:188593959 | BAG32934.1 |
| AP009380 | PGN_0416  | putative type II DNA modification methyltransferase                                        | 456487 | 457500 | 1014 reverse | 0.635 | -0.654 | 0.015 | 0.056 | 0.268 | -2.440 | CDS  | GI:188593960 | BAG32935.1 |
| AP009380 | PGN_0417  | conserved hypothetical protein                                                             | 457693 | 457986 | 294 reverse  | 0.499 | -1.004 | 0.006 | 0.029 | 0.363 | -2.763 | CDS  | GI:188593961 | BAG32936.1 |
| AP009380 | PGN_0418  | conserved hypothetical protein with aminodeoxychorismate lyase domain                      | 458560 | 459654 | 1095 forward | 0.887 | -0.174 | 0.491 | 0.628 | 0.252 | -0.688 | CDS  | GI:188593962 | BAG32937.1 |
| AP009380 | PGN_0419  | putative dinucleotide-utilizing enzyme involved in molybdopterin and thiamine biosynthesis | 459651 | 460400 | 750 forward  | 0.903 | -0.147 | 0.572 | 0.692 | 0.260 | -0.565 | CDS  | GI:188593963 | BAG32938.1 |
| AP009380 | PGN_0420  | putative lipoprotein releasing system ATP-binding protein                                  | 460397 | 461056 | 660 forward  | 1.466 | 0.552  | 0.010 | 0.042 | 0.213 | 2.590  | CDS  | GI:188593964 | BAG32939.1 |
| AP009380 | PGN_0421  | conserved hypothetical protein                                                             | 461086 | 461790 | 705 forward  | 1.345 | 0.427  | 0.044 | 0.117 | 0.212 | 2.019  | CDS  | GI:188593965 | BAG32940.1 |
| AP009380 | PGN_0422  | conserved hypothetical protein                                                             | 461797 | 462399 | 603 forward  | 1.257 | 0.330  | 0.104 | 0.218 | 0.203 | 1.624  | CDS  | GI:188593966 | BAG32941.1 |
| AP009380 | PGN_0423  | putative transcription elongation factor                                                   | 462882 | 463352 | 471 forward  | 0.822 | -0.282 | 0.281 | 0.429 | 0.262 | -1.077 | CDS  | GI:188593967 | BAG32942.1 |
| AP009380 | PGN_0424  | putative HIT family protein                                                                | 463368 | 463757 | 390 forward  | 0.966 | -0.050 | 0.842 | 0.898 | 0.252 | -0.200 | CDS  | GI:188593968 | BAG32943.1 |
| AP009380 | PGN_0425  | partial transposase in ISPg3                                                               | 463896 | 464033 | 138 reverse  | 0.532 | -0.912 | 0.014 | 0.054 | 0.371 | -2.458 | CDS  | GI:188593969 | BAG32944.1 |
| AP009380 | PGN_0426  | conserved hypothetical protein                                                             | 464668 | 465144 | 477 reverse  | 0.370 | -1.434 | 0.000 | 0.000 | 0.274 | -5.234 | CDS  | GI:188593970 | BAG32945.1 |
| AP009380 | PGN_0427  | putative glycosyl hydrolase                                                                | 465141 | 466427 | 1287 reverse | 0.572 | -0.806 | 0.010 | 0.042 | 0.311 | -2.593 | CDS  | GI:188593971 | BAG32946.1 |
| AP009380 | PGN_0428  | putative glycosyl transferase family 1                                                     | 466424 | 467686 | 1263 reverse | 0.747 | -0.421 | 0.220 | 0.363 | 0.343 | -1.228 | CDS  | GI:188593972 | BAG32947.1 |
| AP009380 | PGN_0429  | putative 4-alpha-glucanotransferase                                                        | 467683 | 469659 | 1977 reverse | 0.655 | -0.610 | 0.154 | 0.283 | 0.428 | -1.426 | CDS  | GI:188593973 | BAG32948.1 |
| AP009380 | PGN_0430  | putative ATP-binding component of ABC transporter protein                                  | 470146 | 470847 | 702 reverse  | 0.918 | -0.123 | 0.724 | 0.809 | 0.347 | -0.354 | CDS  | GI:188593974 | BAG32949.1 |
| AP009380 | PGN_0431  | conserved hypothetical protein                                                             | 470882 | 472240 | 1359 reverse | 0.640 | -0.644 | 0.013 | 0.052 | 0.260 | -2.476 | CDS  | GI:188593975 | BAG32950.1 |
| AP009380 | PGN_0432  | conserved hypothetical protein                                                             | 472260 | 472367 | 108 forward  | 0.800 | -0.322 | 0.583 | 0.702 | 0.587 | -0.549 | CDS  | GI:188593976 | BAG32951.1 |
| AP009380 | PGN_0433  | phosphoglycerate kinase                                                                    | 472474 | 473730 | 1257 reverse | 1.650 | 0.723  | 0.025 | 0.079 | 0.322 | 2.247  | CDS  | GI:188593977 | BAG32952.1 |
| AP009380 | PGN_0434  | phosphoenolpyruvate carboxykinase                                                          | 474026 | 475633 | 1608 forward | 2.020 | 1.014  | 0.007 | 0.032 | 0.373 | 2.717  | CDS  | GI:188593978 | BAG32953.1 |
| AP009380 | PGN_0435  | probable partial hemagglutinin-related protein                                             | 475829 | 476041 | 213 reverse  | 0.414 | -1.273 | 0.030 | 0.093 | 0.588 | -2.164 | CDS  | GI:188593979 | BAG32954.1 |
| AP009380 | PGN_0436  | probable partial hemagglutinin-related protein                                             | 476041 | 476403 | 363 reverse  | 0.475 | -1.074 | 0.048 | 0.125 | 0.544 | -1.974 | CDS  | GI:188593980 | BAG32955.1 |
| AP009380 | PGN_0437  | conserved hypothetical protein                                                             | 476631 | 476939 | 309 reverse  | 0.793 | -0.334 | 0.113 | 0.230 | 0.211 | -1.584 | CDS  | GI:188593981 | BAG32956.1 |
| AP009380 | PGN_0438  | conserved hypothetical protein                                                             | 476938 | 477306 | 369 forward  | 0.760 | -0.396 | 0.041 | 0.112 | 0.193 | -2.047 | CDS  | GI:188593982 | BAG32957.1 |
| AP009380 | PGN_r0004 | 16S ribosomal RNA                                                                          | 477275 | 478749 | 1475 forward | 0.612 | -0.709 | 0.001 | 0.009 | 0.219 | -3.237 | rRNA |              |            |
| AP009380 | PGN_0439  | conserved hypothetical protein                                                             | 478862 | 479020 | 159 forward  | 0.854 | -0.228 | 0.344 | 0.494 | 0.241 | -0.946 | CDS  | GI:188593983 | BAG32958.1 |
| AP009380 | PGN_0440  | conserved hypothetical protein                                                             | 479147 | 479302 | 156 forward  | 1.079 | 0.110  | 0.587 | 0.705 | 0.203 | 0.543  | CDS  | GI:188593984 | BAG32959.1 |
| AP009380 | PGN_10013 | tRNA-Ile                                                                                   | 479312 | 479385 | 74 forward   | 0.394 | -1.345 | 0.006 | 0.029 | 0.486 | -2.770 | tRNA |              |            |
| AP009380 | PGN_10014 | tRNA-Ala                                                                                   | 479387 | 479463 | 77 forward   | 0.452 | -1.146 | 0.003 | 0.018 | 0.384 | -2.986 | tRNA |              |            |
| AP009380 | PGN_r0005 | 23S ribosomal RNA                                                                          | 479582 | 482414 | 2833 forward | 0.484 | -1.047 | 0.000 | 0.001 | 0.262 | -3.993 | rRNA |              |            |
| AP009380 | PGN_r0006 | 5S ribosomal RNA                                                                           | 482561 | 482668 | 108 forward  | 0.251 | -1.992 | 0.000 | 0.000 | 0.457 | -4.363 | rRNA |              |            |
| AP009380 | PGN_0441  | hypothetical protein                                                                       | 482818 | 482919 | 102 reverse  | 0.614 | -0.703 | 0.039 | 0.109 | 0.341 | -2.065 | CDS  | GI:188593985 | BAG32960.1 |
| AP009380 | PGN_0442  | transposase in ISPg3                                                                       | 482969 | 483871 | 903 reverse  | 0.709 | -0.497 | 0.156 | 0.285 | 0.350 | -1.418 | CDS  | GI:188593986 | BAG32961.1 |
| AP009380 | PGN_0443  | hypothetical protein                                                                       | 484199 | 484372 | 174 forward  | 0.688 | -0.539 | 0.358 | 0.503 | 0.586 | -0.919 | CDS  | GI:188593987 | BAG32962.1 |
| AP009380 | PGN_0444  | probable outer membrane efflux protein                                                     | 484845 | 486212 | 1368 reverse | 0.652 | -0.618 | 0.057 | 0.141 | 0.325 | -1.901 | CDS  | GI:188593988 | BAG32963.1 |
| AP009380 | PGN_0445  | membrane fusion efflux protein                                                             | 486209 | 487315 | 1107 reverse | 0.596 | -0.746 | 0.040 | 0.110 | 0.362 | -2.058 | CDS  | GI:188593989 | BAG32964.1 |
| AP009380 | PGN_0446  | putative ABC transporter ATP-binding protein                                               | 487385 | 488647 | 1263 reverse | 0.606 | -0.724 | 0.026 | 0.084 | 0.326 | -2.220 | CDS  | GI:188593990 | BAG32965.1 |
| AP009380 | PGN_0447  | putative ABC transporter permease protein                                                  | 488670 | 489944 | 1275 reverse | 0.582 | -0.781 | 0.022 | 0.073 | 0.340 | -2.294 | CDS  | GI:188593991 | BAG32966.1 |
| AP009380 | PGN_0448  | putative ABC transporter ATP-binding protein                                               | 489969 | 490628 | 660 reverse  | 0.695 | -0.525 | 0.139 | 0.263 | 0.355 | -1.478 | CDS  | GI:188593992 | BAG32967.1 |
| AP009380 | PGN_0449  | conserved hypothetical protein                                                             | 490647 | 491054 | 408 reverse  | 0.593 | -0.754 | 0.031 | 0.094 | 0.351 | -2.151 | CDS  | GI:188593993 | BAG32968.1 |
| AP009380 | PGN_0450  | putative RNA polymerase sigma-70 factor ECF subfamily                                      | 491540 | 492064 | 525 forward  | 0.846 | -0.241 | 0.378 | 0.520 | 0.273 | -0.882 | CDS  | GI:188593994 | BAG32969.1 |
| AP009380 | PGN_0451  | conserved hypothetical protein                                                             | 492061 | 492453 | 393 forward  | 0.680 | -0.557 | 0.045 | 0.121 | 0.278 | -2.001 | CDS  | GI:188593995 | BAG32970.1 |
| AP009380 | PGN_0452  | conserved hypothetical protein                                                             | 492540 | 492602 | 63 reverse   | 0.634 | -0.657 | 0.038 | 0.108 | 0.317 | -2.070 | CDS  | GI:188593996 | BAG32971.1 |
| AP009380 | PGN_0453  | partial transposase Orl1 in ISPg5                                                          | 492650 | 492766 | 117 reverse  | 0.473 | -1.081 | 0.000 | 0.001 | 0.273 | -3.959 | CDS  | GI:188593997 | BAG32972.1 |
| AP009380 | PGN_0454  | transposase in ISPg3                                                                       | 492790 | 493692 | 903 reverse  | 0.592 | -0.756 | 0.015 | 0.058 | 0.312 | -2.421 | CDS  | GI:188593998 | BAG32973.1 |
| AP009380 | PGN_0455  | partial transposase Orl1 in ISPg5                                                          | 493799 | 494002 | 204 reverse  | 0.367 | -1.448 | 0.000 | 0.000 | 0.306 | -4.728 | CDS  | GI:188593999 | BAG32974.1 |
| AP009380 | PGN_0456  | methylmalonyl-CoA mutase large subunit                                                     | 494428 | 496575 | 2148 reverse | 1.041 | 0.057  | 0.844 | 0.900 | 0.292 | 0.197  | CDS  | GI:188594000 | BAG32975.1 |
| AP009380 | PGN_0457  | methylmalonyl-CoA mutase small subunit                                                     | 496604 | 498460 | 1857 reverse | 0.649 | -0.624 | 0.020 | 0.068 | 0.267 | -2.333 | CDS  | GI:188594001 | BAG32976.1 |
| AP009380 | PGN_0458  | hypothetical protein                                                                       | 498707 | 500233 | 1527 forward | 1.291 | 0.369  | 0.090 | 0.198 | 0.218 | 1.695  | CDS  | GI:188594002 | BAG32977.1 |
| AP009380 | PGN_0459  | transposase in ISPg3                                                                       | 501114 | 502016 | 903 forward  | 0.421 | -1.249 | 0.001 | 0.007 | 0.373 | -3.346 | CDS  | GI:188594003 | BAG32978.1 |
| AP009380 | PGN_0460  | DNA-binding protein histone-like family                                                    | 502076 | 502513 | 438 forward  | 0.211 | -2.248 | 0.000 | 0.000 | 0.304 | -7.393 | CDS  | GI:188594004 | BAG32979.1 |
| AP009380 | PGN_0461  | probable D-alanyl-D-alanine dipeptidase                                                    | 503654 | 504277 | 624 reverse  | 1.005 | 0.007  | 0.979 | 0.983 | 0.282 | 0.027  | CDS  | GI:188594005 | BAG32980.1 |
| AP009380 | PGN_0462  | probable haloacid dehalogenase-like hydrolase                                              | 504357 | 505580 | 1224 reverse | 0.953 | -0.069 | 0.798 | 0.865 | 0.270 | -0.256 | CDS  | GI:188594006 | BAG32981.1 |
| AP009380 | PGN_0463  | conserved hypothetical protein                                                             | 505605 | 507386 | 1782 reverse | 1.021 | 0.030  | 0.914 | 0.948 | 0.280 | 0.108  | CDS  | GI:188594007 | BAG32982.1 |
| AP009380 | PGN_0464  | conserved hypothetical protein                                                             | 507422 | 510409 | 2988 reverse | 0.860 | -0.218 | 0.503 | 0.636 | 0.325 | -0.669 | CDS  | GI:188594008 | BAG32983.1 |
| AP009380 | PGN_0465  | GTP pyrophosphokinase                                                                      | 510667 | 512907 | 2241 reverse | 0.988 | -0.018 | 0.959 | 0.970 | 0.352 | -0.051 | CDS  | GI:188594009 | BAG32984.1 |
| AP009380 | PGN_0466  | putative cardiolipin synthetase                                                            | 512975 | 514396 | 1422 reverse | 0.924 | -0.115 | 0.716 | 0.806 | 0.315 | -0.364 | CDS  | GI:188594010 | BAG32985.1 |
| AP009380 | PGN_0467  | conserved hypothetical protein                                                             | 514628 | 514804 | 177 forward  | 0.584 | -0.776 | 0.072 | 0.165 | 0.430 | -1.802 | CDS  | GI:188594011 | BAG32986.1 |
| AP009380 | PGN_0468  | conserved hypothetical protein with DUF452 domain                                          | 514794 | 515546 | 753 forward  | 2.232 | 1.158  | 0.001 | 0.007 | 0.347 | 3.338  | CDS  | GI:188594012 | BAG32987.1 |
| AP009380 | PGN_0469  | probable biotin synthesis protein                                                          | 515537 | 516292 | 756 forward  | 1.344 | 0.426  | 0.196 | 0.334 | 0.330 | 1.293  | CDS  | GI:188594013 | BAG32988.1 |
| AP009380 | PGN_0470  | conserved hypothetical protein                                                             | 516322 | 517398 | 1077 reverse | 1.069 | 0.096  | 0.681 | 0.779 | 0.233 | 0.411  | CDS  | GI:188594014 | BAG32989.1 |
| AP009380 | PGN_0471  | conserved hypothetical protein                                                             | 517391 | 518338 | 948 reverse  | 0.945 | -0.082 | 0.646 | 0.752 | 0.179 | -0.460 | CDS  | GI:188594015 | BAG32990.1 |
| AP009380 | PGN_0472  | DNA topoisomerase IV A subunit                                                             | 518325 | 521021 | 2697 reverse | 0.781 | -0.357 | 0.227 | 0.369 | 0.295 | -1.209 | CDS  | GI:188594016 | BAG32991.1 |
| AP009380 | PGN_0473  | conserved hypothetical protein                                                             | 521082 | 522275 | 1194 reverse | 1.031 | 0.044  | 0.866 | 0.916 | 0.260 | 0.169  | CDS  | GI:188594017 | BAG32992.1 |
| AP009380 | PGN_0474  | hypothetical protein                                                                       | 522300 | 522398 | 99 forward   | 0.585 | -0.774 | 0.098 | 0.210 | 0.469 | -1.653 | CDS  | GI:188594018 | BAG32993.1 |
| AP009380 | PGN_0475  | hypothetical protein                                                                       | 522487 | 522897 | 411 forward  | 0.918 | -0.123 | 0.701 | 0.795 | 0.322 | -0.384 | CDS  | GI:188594019 | BAG32994.1 |
| AP009380 | PGN_0476  | conserved hypothetical protein                                                             | 523058 | 524257 | 1200 forward | 0.855 | -0.226 | 0.565 | 0.687 | 0.392 | -0.575 | CDS  | GI:188594020 | BAG32995.1 |
| AP009380 | PGN_0477  | conserved hypothetical protein                                                             | 524362 | 526026 | 1665 forward | 0.699 | -0.517 | 0.242 | 0.386 | 0.442 | -1.171 | CDS  | GI:188594021 | BAG32996.1 |
| AP009380 | PGN_0478  | partial transposase in ISPg4                                                               | 526319 | 526489 | 171 reverse  | 0.634 | -0.656 | 0.032 | 0.096 | 0.307 | -2.141 | CDS  | GI:188594022 | BAG32997.1 |
| AP009380 | PGN_0479  | hypothetical protein                                                                       | 527100 | 527192 | 93 reverse   | 0.657 | -0.605 | 0.218 | 0.361 | 0.491 | -1.233 | CDS  | GI:188594023 | BAG32998.1 |
| AP009380 | PGN_0480  | partial transposase in ISPg4                                                               | 527564 | 528007 | 444 reverse  | 0.336 | -1.573 | 0.000 | 0.001 | 0.376 | -4.179 | CDS  | GI:188594024 | BAG32999.1 |
| AP009380 | PGN_0481  | hypothetical protein                                                                       | 528038 | 529306 | 1269 forward | 0.259 | -1.951 | 0.000 | 0.000 | 0.206 | -9.486 | CDS  | GI:188594025 | BAG33000.1 |
| AP009380 | PGN_0482  | probable immunoreactive 23 kDa antigen                                                     | 529331 | 529960 | 630 forward  | 0.277 | -1.852 | 0.000 | 0.000 | 0.204 | -9.080 | CDS  | GI:188594026 | BAG33001.1 |
| AP009380 | PGN_0483  | putative aldose 1-epimerase                                                                | 530166 | 531233 | 1068 forward | 1.050 | 0.070  | 0.721 | 0.809 | 0.196 | 0.357  | CDS  | GI:188594027 | BAG33002.1 |
| AP009380 | PGN_0484  | putative galactokinase                                                                     |        |        |              |       |        |       |       |       |        |      |              |            |

|          |           |                                                      |      |        |        |      |         |       |        |       |       |        |        |              |              |            |
|----------|-----------|------------------------------------------------------|------|--------|--------|------|---------|-------|--------|-------|-------|--------|--------|--------------|--------------|------------|
| AP009380 | PGN_0497  | fumarate reductase flavoprotein subunit              |      | 543574 | 545517 | 1944 | forward | 1.100 | 0.137  | 0.612 | 0.725 | 0.271  | 0.507  | CDS          | GI:188594041 | BAG33016.1 |
| AP009380 | PGN_0498  | fumarate reductase iron-sulfur protein               |      | 545546 | 546301 | 756  | forward | 0.420 | -1.251 | 0.000 | 0.002 | 0.327  | -3.828 | CDS          | GI:188594042 | BAG33017.1 |
| AP009380 | PGN_0499  | conserved hypothetical protein                       |      | 546534 | 546938 | 405  | forward | 1.220 | 0.286  | 0.216 | 0.359 | 0.231  | 1.237  | CDS          | GI:188594043 | BAG33018.1 |
| AP009380 | PGN_0500  | methylmalonyl-CoA decarboxylase alpha subunit        |      | 547037 | 548590 | 1554 | forward | 1.570 | 0.650  | 0.019 | 0.068 | 0.278  | 2.339  | CDS          | GI:188594044 | BAG33019.1 |
| AP009380 | PGN_0501  | conserved hypothetical protein                       |      | 548615 | 549556 | 942  | forward | 2.024 | 1.017  | 0.001 | 0.009 | 0.314  | 3.239  | CDS          | GI:188594045 | BAG33020.1 |
| AP009380 | PGN_0502  | conserved hypothetical protein                       |      | 549553 | 549789 | 237  | forward | 2.111 | 1.078  | 0.002 | 0.011 | 0.340  | 3.169  | CDS          | GI:188594046 | BAG33021.1 |
| AP009380 | PGN_0503  | putative biotin carboxyl carrier protein             |      | 549828 | 550274 | 447  | forward | 1.986 | 0.990  | 0.001 | 0.007 | 0.297  | 3.336  | CDS          | GI:188594047 | BAG33022.1 |
| AP009380 | PGN_0504  | methylmalonyl-CoA decarboxylase beta subunit         |      | 550279 | 551430 | 1152 | forward | 1.531 | 0.615  | 0.033 | 0.098 | 0.289  | 2.130  | CDS          | GI:188594048 | BAG33023.1 |
| AP009380 | PGN_0505  | hypothetical protein                                 |      | 551410 | 551571 | 162  | reverse | 2.713 | 1.440  | 0.006 | 0.031 | 0.526  | 2.735  | CDS          | GI:188594049 | BAG33024.1 |
| AP009380 | PGN_0506  | hypothetical protein                                 |      | 551990 | 552127 | 138  | forward | 0.772 | -0.374 | 0.449 | 0.588 | 0.495  | -0.757 | CDS          | GI:188594050 | BAG33025.1 |
| AP009380 | PGN_0507  | putative ion transporter                             |      | 552508 | 553230 | 723  | forward | 1.296 | 0.374  | 0.149 | 0.277 | 0.259  | 1.443  | CDS          | GI:188594051 | BAG33026.1 |
| AP009380 | PGN_0508  | putative aminopeptidase                              |      | 553557 | 554960 | 1404 | reverse | 4.033 | 2.012  | 0.000 | 0.000 | 0.463  | 4.346  | CDS          | GI:188594052 | BAG33027.1 |
| AP009380 | PGN_0509  | immunoreactive 84 kDa antigen                        |      | 555012 | 557318 | 2307 | reverse | 1.542 | 0.624  | 0.076 | 0.173 | 0.352  | 1.775  | CDS          | GI:188594053 | BAG33028.1 |
| AP009380 | PGN_0510  | probable xanthosine triphosphate pyrophosphatase     |      | 557330 | 557914 | 585  | reverse | 1.124 | 0.169  | 0.638 | 0.747 | 0.359  | 0.471  | CDS          | GI:188594054 | BAG33029.1 |
| AP009380 | PGN_0511  | conserved hypothetical protein                       |      | 557985 | 558365 | 381  | forward | 0.699 | -0.518 | 0.105 | 0.219 | 0.320  | -1.619 | CDS          | GI:188594055 | BAG33030.1 |
| AP009380 | PGN_0512  | probable biotin-acyl-CoA-carboxylase ligase          |      | 558337 | 559110 | 774  | forward | 1.227 | 0.296  | 0.156 | 0.285 | 0.208  | 1.420  | CDS          | GI:188594056 | BAG33031.1 |
| AP009380 | PGN_0513  | conserved hypothetical protein                       |      | 559145 | 560170 | 1026 | forward | 1.055 | 0.077  | 0.820 | 0.881 | 0.340  | 0.228  | CDS          | GI:188594057 | BAG33032.1 |
| AP009380 | PGN_0514  | conserved hypothetical protein                       |      | 560204 | 560992 | 789  | reverse | 1.617 | 0.693  | 0.051 | 0.129 | 0.354  | 1.955  | CDS          | GI:188594058 | BAG33033.1 |
| AP009380 | PGN_0515  | probable lipoprotein signal peptidase                |      | 560989 | 561669 | 681  | reverse | 1.054 | 0.075  | 0.806 | 0.871 | 0.308  | 0.245  | CDS          | GI:188594059 | BAG33034.1 |
| AP009380 | PGN_0516  | putative DnaK suppressor protein                     |      | 561673 | 562053 | 381  | reverse | 1.391 | 0.476  | 0.034 | 0.100 | 0.225  | 2.117  | CDS          | GI:188594060 | BAG33035.1 |
| AP009380 | PGN_0517  | isoleucyl-tRNA synthetase                            |      | 562123 | 565536 | 3414 | reverse | 1.543 | 0.626  | 0.007 | 0.032 | 0.230  | 2.718  | CDS          | GI:188594061 | BAG33036.1 |
| AP009380 | PGN_0518  | putative ribulose-phosphate 3-epimerase              |      | 565878 | 566534 | 657  | forward | 1.111 | 0.152  | 0.565 | 0.687 | 0.264  | 0.575  | CDS          | GI:188594062 | BAG33037.1 |
| AP009380 | PGN_0519  | probable competence protein                          |      | 566592 | 568076 | 1485 | forward | 1.504 | 0.589  | 0.027 | 0.085 | 0.266  | 2.210  | CDS          | GI:188594063 | BAG33038.1 |
| AP009380 | PGN_0520  | probable shikimate kinase                            |      | 568015 | 568575 | 561  | reverse | 1.356 | 0.439  | 0.030 | 0.092 | 0.203  | 2.165  | CDS          | GI:188594064 | BAG33039.1 |
| AP009380 | PGN_0521  | conserved hypothetical protein                       |      | 568623 | 570695 | 2073 | reverse | 1.103 | 0.141  | 0.506 | 0.638 | 0.213  | 0.665  | CDS          | GI:188594065 | BAG33040.1 |
| AP009380 | PGN_10015 | tRNA-His                                             |      | 570911 | 570985 | 75   | reverse | 0.503 | -0.992 | 0.024 | 0.078 | 0.440  | -2.256 | tRNA         |              |            |
| AP009380 | PGN_0522  | putative dihydroterate synthase                      |      | 571504 | 572349 | 846  | forward | 1.098 | 0.134  | 0.625 | 0.735 | 0.274  | 0.489  | CDS          | GI:188594066 | BAG33041.1 |
| AP009380 | PGN_0523  | conserved hypothetical protein                       |      | 572409 | 573176 | 768  | forward | 1.431 | 0.517  | 0.155 | 0.284 | 0.364  | 1.421  | CDS          | GI:188594067 | BAG33042.1 |
| AP009380 | PGN_0524  | lipid A 4'-phosphatase                               |      | 573192 | 573902 | 711  | reverse | 1.626 | 0.701  | 0.054 | 0.136 | 0.365  | 1.923  | CDS          | GI:188594068 | BAG33043.1 |
| AP009380 | PGN_0525  | probable aerotolerance-related exported protein BatE | batE | 573929 | 574837 | 909  | reverse | 1.916 | 0.938  | 0.007 | 0.032 | 0.345  | 2.720  | CDS          | GI:188594069 | BAG33044.1 |
| AP009380 | PGN_0526  | aerotolerance-related exported protein BatD          | batD | 574834 | 576636 | 1803 | reverse | 1.470 | 0.556  | 0.053 | 0.134 | 0.288  | 1.932  | CDS          | GI:188594070 | BAG33045.1 |
| AP009380 | PGN_0527  | probable aerotolerance-related exported protein BatC | batC | 576817 | 577563 | 747  | reverse | 1.410 | 0.496  | 0.047 | 0.123 | 0.250  | 1.983  | CDS          | GI:188594071 | BAG33046.1 |
| AP009380 | PGN_0528  | putative aerotolerance-related exported protein BatB | batB | 577560 | 578579 | 1020 | reverse | 1.170 | 0.226  | 0.336 | 0.485 | 0.235  | 0.963  | CDS          | GI:188594072 | BAG33047.1 |
| AP009380 | PGN_0529  | aerotolerance-related membrane protein BatA          | batA | 578590 | 579573 | 984  | reverse | 1.005 | 0.007  | 0.973 | 0.979 | 0.195  | 0.034  | CDS          | GI:188594073 | BAG33048.1 |
| AP009380 | PGN_0530  | conserved hypothetical protein                       |      | 579570 | 580526 | 957  | reverse | 0.861 | -0.215 | 0.373 | 0.515 | 0.241  | -0.892 | CDS          | GI:188594074 | BAG33049.1 |
| AP009380 | PGN_0531  | putative von Willebrand factor type A                |      | 580523 | 581395 | 873  | reverse | 0.867 | -0.206 | 0.524 | 0.652 | 0.324  | -0.637 | CDS          | GI:188594075 | BAG33050.1 |
| AP009380 | PGN_0532  | magnesium chelatae subunit I                         |      | 581406 | 582401 | 996  | reverse | 1.005 | 0.007  | 0.978 | 0.983 | 0.271  | 0.027  | CDS          | GI:188594076 | BAG33051.1 |
| AP009380 | PGN_0533  | putative quinolinate synthetase complex subunit A    |      | 582503 | 583429 | 927  | reverse | 2.132 | 1.092  | 0.009 | 0.041 | 0.420  | 2.602  | CDS          | GI:188594077 | BAG33052.1 |
| AP009380 | PGN_0534  | putative nicotinate-nucleotide pyrophosphorylase     |      | 583449 | 584291 | 843  | reverse | 1.849 | 0.887  | 0.019 | 0.067 | 0.378  | 2.344  | CDS          | GI:188594078 | BAG33053.1 |
| AP009380 | PGN_0535  | Aspartate oxidase                                    |      | 584323 | 585879 | 1557 | reverse | 1.388 | 0.473  | 0.126 | 0.247 | 0.310  | 1.529  | CDS          | GI:188594079 | BAG33054.1 |
| AP009380 | PGN_0536  | conserved hypothetical protein                       |      | 586345 | 586479 | 135  | forward | 0.455 | -1.135 | 0.002 | 0.014 | 0.368  | -3.085 | CDS          | GI:188594080 | BAG33055.1 |
| AP009380 | PGN_0537  | probable transcriptional regulator Crp family        |      | 586999 | 587622 | 624  | forward | 0.371 | -1.430 | 0.000 | 0.003 | 0.393  | -3.642 | CDS          | GI:188594081 | BAG33056.1 |
| AP009380 | PGN_0538  | conserved hypothetical protein                       |      | 587687 | 588493 | 807  | forward | 0.723 | -0.468 | 0.126 | 0.247 | 0.305  | -1.531 | CDS          | GI:188594082 | BAG33057.1 |
| AP009380 | PGN_0539  | metallo-beta-lactamase superfamily protein           |      | 588586 | 590001 | 1416 | forward | 0.938 | -0.093 | 0.762 | 0.837 | 0.307  | -0.303 | CDS          | GI:188594083 | BAG33058.1 |
| AP009380 | PGN_0540  | conserved hypothetical protein                       |      | 589974 | 590357 | 384  | forward | 0.910 | -0.136 | 0.723 | 0.809 | 0.385  | -0.354 | CDS          | GI:188594084 | BAG33059.1 |
| AP009380 | PGN_0541  | hypothetical protein                                 |      | 590351 | 590527 | 177  | reverse | 1.125 | 0.170  | 0.754 | 0.831 | 0.542  | 0.313  | CDS          | GI:188594085 | BAG33060.1 |
| AP009380 | PGN_0542  | partial transposase in ISPg2                         |      | 590955 | 591218 | 264  | reverse | 0.431 | -1.215 | 0.000 | 0.030 | -3.681 | CDS    | GI:188594086 | BAG33061.1   |            |
| AP009380 | PGN_0543  | glutamyl-tRNA synthetase                             |      | 591535 | 593058 | 1524 | forward | 1.562 | 0.643  | 0.065 | 0.153 | 0.348  | 1.849  | CDS          | GI:188594087 | BAG33062.1 |
| AP009380 | PGN_0544  | 3-deoxy-D-manno-oxulosonic acid transferase          |      | 593083 | 594321 | 1239 | forward | 2.278 | 1.188  | 0.003 | 0.019 | 0.402  | 2.955  | CDS          | GI:188594088 | BAG33063.1 |
| AP009380 | PGN_0545  | putative sulfatase                                   |      | 594406 | 596361 | 1956 | forward | 3.235 | 1.694  | 0.000 | 0.003 | 0.471  | 3.592  | CDS          | GI:188594089 | BAG33064.1 |
| AP009380 | PGN_0546  | glucose-1-phosphate thymidyltransferase              |      | 596476 | 597345 | 870  | forward | 1.250 | 0.322  | 0.293 | 0.441 | 0.306  | 1.051  | CDS          | GI:188594090 | BAG33065.1 |
| AP009380 | PGN_0547  | dTDP-4-dehydrothiamine 3,5-epimerase                 |      | 597360 | 597950 | 591  | forward | 1.836 | 0.876  | 0.018 | 0.065 | 0.371  | 2.362  | CDS          | GI:188594091 | BAG33066.1 |
| AP009380 | PGN_0548  | putative dTDP-4-dehydrothiamine reductase            |      | 597947 | 598804 | 858  | forward | 1.691 | 0.758  | 0.049 | 0.127 | 0.385  | 1.966  | CDS          | GI:188594092 | BAG33067.1 |
| AP009380 | PGN_0549  | dTDP-glucose 4,6-dehydratase                         |      | 598811 | 599875 | 1065 | forward | 1.944 | 0.959  | 0.020 | 0.070 | 0.413  | 2.320  | CDS          | GI:188594093 | BAG33068.1 |
| AP009380 | PGN_0550  | aminomethyltransferase                               |      | 599950 | 601038 | 1089 | forward | 1.520 | 0.604  | 0.044 | 0.118 | 0.300  | 2.014  | CDS          | GI:188594094 | BAG33069.1 |
| AP009380 | PGN_0551  | conserved hypothetical protein                       |      | 601328 | 601423 | 96   | reverse | 0.963 | -0.054 | 0.925 | 0.952 | 0.574  | -0.094 | CDS          | GI:188594095 | BAG33070.1 |
| AP009380 | PGN_0552  | hypothetical protein                                 |      | 601640 | 601777 | 138  | reverse | 0.576 | -0.797 | 0.177 | 0.311 | 0.591  | -1.349 | CDS          | GI:188594096 | BAG33071.1 |
| AP009380 | PGN_0553  | conserved hypothetical protein                       |      | 602002 | 602328 | 327  | reverse | 3.224 | 1.689  | 0.002 | 0.013 | 0.542  | 3.117  | CDS          | GI:188594097 | BAG33072.1 |
| AP009380 | PGN_0554  | conserved hypothetical protein                       |      | 602334 | 602903 | 570  | reverse | 1.549 | 0.631  | 0.270 | 0.417 | 0.572  | 1.103  | CDS          | GI:188594098 | BAG33073.1 |
| AP009380 | PGN_0555  | conserved hypothetical protein                       |      | 602982 | 603659 | 678  | reverse | 0.334 | -1.582 | 0.000 | 0.004 | 0.443  | -3.569 | CDS          | GI:188594099 | BAG33074.1 |
| AP009380 | PGN_0556  | putative cobalamin biosynthesis-related protein      |      | 603656 | 608065 | 4410 | reverse | 0.754 | -0.407 | 0.075 | 0.171 | 0.228  | -1.782 | CDS          | GI:188594100 | BAG33075.1 |
| AP009380 | PGN_0557  | TonB-dependent receptor HmuR                         | hmuR | 608102 | 610042 | 1941 | reverse | 1.280 | 0.356  | 0.099 | 0.210 | 0.215  | 1.651  | CDS          | GI:188594101 | BAG33076.1 |
| AP009380 | PGN_0558  | conserved hypothetical protein                       |      | 610057 | 610707 | 651  | reverse | 1.932 | 0.950  | 0.001 | 0.009 | 0.293  | 3.246  | CDS          | GI:188594102 |            |

|          |          |                                                                    |       |        |        |              |       |        |       |       |       |        |     |              |            |
|----------|----------|--------------------------------------------------------------------|-------|--------|--------|--------------|-------|--------|-------|-------|-------|--------|-----|--------------|------------|
| AP009380 | PGN_0581 | conserved hypothetical protein                                     |       | 635151 | 636635 | 1485 forward | 0.687 | -0.543 | 0.036 | 0.102 | 0.258 | -2.100 | CDS | GI:188594125 | BAG33100.1 |
| AP009380 | PGN_0582 | DNA topoisomerase I                                                |       | 636731 | 638812 | 2082 forward | 0.698 | -0.519 | 0.068 | 0.159 | 0.284 | -1.826 | CDS | GI:188594126 | BAG33101.1 |
| AP009380 | PGN_0583 | conserved hypothetical protein                                     |       | 638954 | 640594 | 1641 forward | 0.594 | -0.752 | 0.021 | 0.071 | 0.325 | -2.312 | CDS | GI:188594127 | BAG33102.1 |
| AP009380 | PGN_0584 | conserved hypothetical protein                                     |       | 640869 | 642197 | 1329 reverse | 0.696 | -0.523 | 0.075 | 0.171 | 0.294 | -1.782 | CDS | GI:188594128 | BAG33103.1 |
| AP009380 | PGN_0585 | transposase in ISPg3                                               |       | 642231 | 643133 | 903 forward  | 0.773 | -0.372 | 0.262 | 0.408 | 0.332 | -1.122 | CDS | GI:188594129 | BAG33104.1 |
| AP009380 | PGN_0586 | conserved hypothetical protein                                     |       | 643172 | 643486 | 315 forward  | 0.406 | -1.301 | 0.000 | 0.003 | 0.358 | -3.634 | CDS | GI:188594130 | BAG33105.1 |
| AP009380 | PGN_0587 | transposase in ISPg1                                               |       | 643570 | 644655 | 1086 forward | 0.677 | -0.563 | 0.223 | 0.366 | 0.462 | -1.219 | CDS | GI:188594131 | BAG33106.1 |
| AP009380 | PGN_0588 | conserved hypothetical protein                                     |       | 644756 | 645304 | 549 forward  | 0.726 | -0.463 | 0.320 | 0.471 | 0.466 | -0.994 | CDS | GI:188594132 | BAG33107.1 |
| AP009380 | PGN_0589 | conserved hypothetical protein                                     |       | 645609 | 645830 | 222 forward  | 0.576 | -0.796 | 0.057 | 0.140 | 0.418 | -1.906 | CDS | GI:188594133 | BAG33108.1 |
| AP009380 | PGN_0590 | putative Fic family protein                                        |       | 646047 | 647105 | 1059 forward | 0.582 | -0.780 | 0.003 | 0.019 | 0.265 | -2.947 | CDS | GI:188594134 | BAG33109.1 |
| AP009380 | PGN_0591 | conserved hypothetical protein                                     |       | 647136 | 648518 | 1383 reverse | 0.647 | -0.629 | 0.036 | 0.103 | 0.300 | -2.098 | CDS | GI:188594135 | BAG33110.1 |
| AP009380 | PGN_0592 | putative conserved protein found in conjugate transposon TraQ      | traQ  | 648638 | 649075 | 438 reverse  | 0.852 | -0.231 | 0.447 | 0.585 | 0.304 | -0.761 | CDS | GI:188594136 | BAG33111.1 |
| AP009380 | PGN_0593 | putative conserved protein found in conjugate transposon TraO      | traO  | 649095 | 649679 | 585 reverse  | 0.784 | -0.352 | 0.266 | 0.413 | 0.316 | -1.113 | CDS | GI:188594137 | BAG33112.1 |
| AP009380 | PGN_0594 | conserved protein found in conjugate transposon TraN               | traN  | 649684 | 650619 | 936 reverse  | 0.782 | -0.354 | 0.175 | 0.308 | 0.261 | -1.357 | CDS | GI:188594138 | BAG33113.1 |
| AP009380 | PGN_0595 | putative conserved protein found in conjugate transposon TraM      | traM  | 650693 | 652054 | 1362 reverse | 0.514 | -0.961 | 0.009 | 0.041 | 0.370 | -2.596 | CDS | GI:188594139 | BAG33114.1 |
| AP009380 | PGN_0596 | conserved hypothetical protein found in conjugate transposon       |       | 652011 | 652314 | 264 reverse  | 0.641 | -0.641 | 0.157 | 0.285 | 0.452 | -1.417 | CDS | GI:188594140 | BAG33115.1 |
| AP009380 | PGN_0597 | putative conserved protein found in conjugate transposon TraK      | traK  | 652318 | 652941 | 624 reverse  | 0.475 | -1.074 | 0.022 | 0.073 | 0.469 | -2.290 | CDS | GI:188594141 | BAG33116.1 |
| AP009380 | PGN_0598 | conserved transmembrane protein found in conjugate transposon TraJ | traJ  | 652959 | 653945 | 987 reverse  | 0.498 | -1.006 | 0.007 | 0.032 | 0.372 | -2.708 | CDS | GI:188594142 | BAG33117.1 |
| AP009380 | PGN_0599 | putative conserved protein found in conjugate transposon TraI      | traI  | 653966 | 654589 | 624 reverse  | 0.513 | -0.963 | 0.004 | 0.024 | 0.338 | -2.850 | CDS | GI:188594143 | BAG33118.1 |
| AP009380 | PGN_0600 | conserved hypothetical protein                                     |       | 654641 | 655108 | 468 reverse  | 0.451 | -1.149 | 0.012 | 0.048 | 0.455 | -2.526 | CDS | GI:188594144 | BAG33119.1 |
| AP009380 | PGN_0601 | conserved hypothetical protein                                     |       | 655186 | 655605 | 420 reverse  | 0.815 | -0.296 | 0.318 | 0.468 | 0.297 | -0.998 | CDS | GI:188594145 | BAG33120.1 |
| AP009380 | PGN_0602 | transposase in ISPg1                                               |       | 655769 | 656854 | 1086 forward | 0.635 | -0.655 | 0.157 | 0.286 | 0.462 | -1.416 | CDS | GI:188594146 | BAG33121.1 |
| AP009380 | PGN_0603 | hypothetical protein                                               |       | 657387 | 657560 | 174 reverse  | 0.973 | -0.039 | 0.931 | 0.955 | 0.455 | -0.086 | CDS | GI:188594147 | BAG33122.1 |
| AP009380 | PGN_0604 | ferritin                                                           |       | 657990 | 658472 | 483 forward  | 1.820 | 0.864  | 0.016 | 0.059 | 0.358 | 2.415  | CDS | GI:188594148 | BAG33123.1 |
| AP009380 | PGN_0605 | transposase in ISPg1                                               |       | 658720 | 659805 | 1086 reverse | 0.620 | -0.689 | 0.122 | 0.242 | 0.445 | -1.548 | CDS | GI:188594149 | BAG33124.1 |
| AP009380 | PGN_0606 | glucosamine-6-phosphate isomerase                                  |       | 659925 | 661913 | 1989 reverse | 1.112 | 0.153  | 0.600 | 0.715 | 0.291 | 0.525  | CDS | GI:188594150 | BAG33125.1 |
| AP009380 | PGN_0607 | dipeptidyl peptidase 11                                            | dpp11 | 662070 | 664232 | 2163 reverse | 1.385 | 0.470  | 0.042 | 0.115 | 0.231 | 2.033  | CDS | GI:188594151 | BAG33126.1 |
| AP009380 | PGN_0608 | conserved hypothetical protein                                     |       | 664295 | 664750 | 456 reverse  | 0.988 | -0.018 | 0.933 | 0.955 | 0.214 | -0.084 | CDS | GI:188594152 | BAG33127.1 |
| AP009380 | PGN_0609 | probable DNA mismatch repair protein                               |       | 664774 | 665898 | 1125 reverse | 0.894 | -0.162 | 0.442 | 0.581 | 0.211 | -0.768 | CDS | GI:188594153 | BAG33128.1 |
| AP009380 | PGN_0610 | conserved hypothetical protein with DUF1015 domain                 |       | 666064 | 667311 | 1248 reverse | 1.943 | 0.958  | 0.003 | 0.017 | 0.318 | 3.011  | CDS | GI:188594154 | BAG33129.1 |
| AP009380 | PGN_0611 | D-3-phosphoglycerate dehydrogenase                                 |       | 667330 | 668250 | 921 reverse  | 2.047 | 1.034  | 0.004 | 0.023 | 0.361 | 2.862  | CDS | GI:188594155 | BAG33130.1 |
| AP009380 | PGN_0612 | phosphoserine aminotransferase                                     |       | 668351 | 669433 | 1083 reverse | 1.465 | 0.551  | 0.061 | 0.147 | 0.294 | 1.875  | CDS | GI:188594156 | BAG33131.1 |
| AP009380 | PGN_0613 | UDP-glucose 6-dehydrogenase                                        | ugdA  | 669767 | 671074 | 1308 reverse | 0.802 | -0.318 | 0.247 | 0.392 | 0.274 | -1.159 | CDS | GI:188594157 | BAG33132.1 |
| AP009380 | PGN_0614 | DNA-binding protein histone-like family                            |       | 671337 | 671843 | 507 reverse  | 0.891 | -0.166 | 0.593 | 0.711 | 0.312 | -0.534 | CDS | GI:188594158 | BAG33133.1 |
| AP009380 | PGN_0615 | hypothetical protein                                               |       | 671866 | 672081 | 216 reverse  | 0.743 | -0.429 | 0.104 | 0.218 | 0.264 | -1.624 | CDS | GI:188594159 | BAG33134.1 |
| AP009380 | PGN_0616 | probable elongation factor P                                       |       | 672379 | 672945 | 567 reverse  | 1.414 | 0.500  | 0.023 | 0.076 | 0.220 | 2.269  | CDS | GI:188594160 | BAG33135.1 |
| AP009380 | PGN_0617 | conserved hypothetical protein                                     |       | 673077 | 674633 | 1557 reverse | 0.976 | -0.035 | 0.898 | 0.938 | 0.273 | -0.128 | CDS | GI:188594161 | BAG33136.1 |
| AP009380 | PGN_0618 | aspartate-semialdehyde dehydrogenase                               |       | 674829 | 675842 | 1014 forward | 0.863 | -0.212 | 0.305 | 0.453 | 0.207 | -1.025 | CDS | GI:188594162 | BAG33137.1 |
| AP009380 | PGN_0619 | conserved hypothetical protein                                     |       | 675814 | 675951 | 138 reverse  | 1.307 | 0.386  | 0.355 | 0.500 | 0.417 | 0.926  | CDS | GI:188594163 | BAG33138.1 |
| AP009380 | PGN_0620 | putative 5-adenosyl-methyltransferase MraW                         |       | 676513 | 677448 | 936 forward  | 0.974 | -0.038 | 0.910 | 0.946 | 0.338 | -0.113 | CDS | GI:188594164 | BAG33139.1 |
| AP009380 | PGN_0621 | conserved hypothetical protein                                     |       | 677448 | 677921 | 474 forward  | 0.741 | -0.433 | 0.191 | 0.330 | 0.331 | -1.307 | CDS | GI:188594165 | BAG33140.1 |
| AP009380 | PGN_0622 | penicillin-binding protein                                         |       | 677931 | 680132 | 2202 forward | 1.028 | 0.040  | 0.841 | 0.898 | 0.199 | 0.201  | CDS | GI:188594166 | BAG33141.1 |
| AP009380 | PGN_0623 | UDP-N-acetylmuramoylalanine-D-glutamyl-2, 6-diaminopelmate ligase  |       | 680143 | 681606 | 1464 forward | 1.415 | 0.501  | 0.096 | 0.206 | 0.300 | 1.666  | CDS | GI:188594167 | BAG33142.1 |
| AP009380 | PGN_0624 | phospho-N-acetylmuramoyl-pentapeptide-transferase                  |       | 681621 | 682880 | 1260 forward | 0.937 | -0.093 | 0.695 | 0.790 | 0.238 | -0.391 | CDS | GI:188594168 | BAG33143.1 |
| AP009380 | PGN_0625 | UDP-N-acetylmuramoylalanine-D-glutamate ligase                     |       | 682904 | 684256 | 1353 forward | 1.732 | 0.792  | 0.015 | 0.057 | 0.326 | 2.431  | CDS | GI:188594169 | BAG33144.1 |
| AP009380 | PGN_0626 | putative rod shape-determining protein RodA                        |       | 684268 | 685524 | 1257 forward | 1.812 | 0.858  | 0.017 | 0.061 | 0.358 | 2.397  | CDS | GI:188594170 | BAG33145.1 |
| AP009380 | PGN_0627 | N-acetylglucosaminyl transferase                                   |       | 685521 | 686660 | 1140 forward | 1.733 | 0.793  | 0.012 | 0.050 | 0.317 | 2.502  | CDS | GI:188594171 | BAG33146.1 |
| AP009380 | PGN_0628 | UDP-N-acetylmuramate-alanine ligase                                |       | 686660 | 688030 | 1371 forward | 1.696 | 0.762  | 0.022 | 0.073 | 0.332 | 2.295  | CDS | GI:188594172 | BAG33147.1 |
| AP009380 | PGN_0629 | putative cell division protein FtsQ                                |       | 688024 | 688800 | 777 forward  | 0.834 | -0.261 | 0.378 | 0.520 | 0.296 | -0.882 | CDS | GI:188594173 | BAG33148.1 |
| AP009380 | PGN_0630 | probable cell division protein FtsA                                |       | 688858 | 690288 | 1431 forward | 1.121 | 0.164  | 0.553 | 0.676 | 0.277 | 0.594  | CDS | GI:188594174 | BAG33149.1 |
| AP009380 | PGN_0631 | putative cell division protein FtsZ                                |       | 690291 | 691664 | 1374 forward | 1.107 | 0.146  | 0.621 | 0.732 | 0.295 | 0.495  | CDS | GI:188594175 | BAG33150.1 |
| AP009380 | PGN_0632 | conserved hypothetical protein                                     |       | 691696 | 692145 | 450 forward  | 0.849 | -0.235 | 0.541 | 0.667 | 0.385 | -0.611 | CDS | GI:188594176 | BAG33151.1 |
| AP009380 | PGN_0633 | conserved hypothetical protein                                     |       | 693082 | 693714 | 633 reverse  | 1.778 | 0.831  | 0.012 | 0.049 | 0.331 | 2.506  | CDS | GI:188594177 | BAG33152.1 |
| AP009380 | PGN_0634 | 3-methyl-2-oxobutanoate hydroxymethyltransferase                   |       | 693766 | 694587 | 822 reverse  | 1.364 | 0.448  | 0.026 | 0.083 | 0.201 | 2.228  | CDS | GI:188594178 | BAG33153.1 |
| AP009380 | PGN_0635 | glutamine-hydrolyzing GMP synthase                                 |       | 694658 | 696178 | 1521 reverse | 1.436 | 0.522  | 0.012 | 0.048 | 0.208 | 2.514  | CDS | GI:188594179 | BAG33154.1 |
| AP009380 | PGN_0636 | 50S ribosomal protein L31                                          | rpmE  | 696895 | 697152 | 258 forward  | 0.789 | -0.341 | 0.057 | 0.141 | 0.179 | -1.903 | CDS | GI:188594180 | BAG33155.1 |
| AP009380 | PGN_0637 | putative heat shock-related protease htrA protein                  |       | 697369 | 698865 | 1497 forward | 0.645 | -0.633 | 0.065 | 0.154 | 0.343 | -1.845 | CDS | GI:188594181 | BAG33156.1 |
| AP009380 | PGN_0638 | RNA polymerase sigma factor RpoD                                   | rpoD  | 699055 | 699918 | 864 forward  | 1.006 | 0.008  | 0.966 | 0.975 | 0.197 | 0.043  | CDS | GI:188594182 | BAG33157.1 |
| AP009380 | PGN_0639 | 30S ribosomal protein S6                                           | rspF  | 700015 | 700368 | 354 forward  | 1.264 | 0.339  | 0.172 | 0.305 | 0.248 | 1.366  | CDS | GI:188594183 | BAG33158.1 |
| AP009380 | PGN_0640 | 30S ribosomal protein S18                                          | rspR  | 700372 | 700644 | 273 forward  | 1.042 | 0.060  | 0.761 | 0.836 | 0.196 | 0.304  | CDS | GI:188594184 | BAG33159.1 |
| AP009380 | PGN_0641 | 50S ribosomal protein L9                                           | rplI  | 700669 | 701208 | 540 forward  | 0.802 | -0.319 | 0.134 | 0.258 | 0.213 | -1.500 | CDS | GI:188594185 | BAG33160.1 |
| AP009380 | PGN_0642 | conserved hypothetical protein                                     |       | 701484 | 703439 | 1956 forward | 1.108 | 0.148  | 0.476 | 0.613 | 0.208 | 0.712  | CDS | GI:188594186 | BAG33161.1 |
| AP009380 | PGN_0643 | 3,4-dihydroxy-2-butanone 4-phosphate synthase                      |       | 703442 | 704659 | 1218 forward | 1.028 | 0.040  | 0.850 | 0.904 | 0.213 | 0.189  | CDS | GI:188594187 | BAG33162.1 |
| AP009380 | PGN_0644 | transposase in ISPg1                                               |       | 705140 | 706225 | 1086 forward | 0.723 | -0.468 | 0.325 | 0.474 | 0.475 | -0.984 | CDS | GI:188594188 | BAG33163.1 |
| AP009380 | PGN_0645 | Por secretion system protein porQ                                  | porQ  | 706384 | 707424 | 1041 forward | 1.253 | 0.325  | 0.158 | 0.288 | 0.231 | 1.410  | CDS | GI:188594189 | BAG33164.1 |
| AP009380 | PGN_0646 | probable cytidilate kinase                                         |       | 707454 | 708149 | 696 forward  | 1.473 | 0.558  | 0.023 | 0.074 | 0.245 | 2.280  | CDS | GI:188594190 | BAG33165.1 |
| AP009380 | PGN_0647 | hydroxymethylbutenyl pyrophosphate reductase                       |       | 708146 | 709015 | 870 forward  | 1.562 | 0.644  | 0.004 | 0.023 | 0.225 | 2.864  | CDS | GI:188594191 | BAG33166.1 |
| AP009380 | PGN_0648 | conserved hypothetical protein                                     |       | 708999 | 710054 | 1056 reverse | 0.924 | -0.114 | 0.717 | 0.806 | 0.314 | -0.363 | CDS | GI:188594192 | BAG33167.1 |
| AP009380 | PGN_0649 | conserved hypothetical protein                                     |       | 710285 | 710392 | 108 reverse  | 0.584 | -0.775 | 0.028 | 0.086 | 0.352 | -2.203 | CDS | GI:188594193 | BAG33168.1 |
| AP009380 | PGN_0650 | conserved hypothetical protein                                     |       | 710436 | 710798 | 363 forward  | 0.687 | -0.542 | 0.023 | 0.074 | 0.238 | -2.281 | CDS | GI:188594194 | BAG33169.1 |
| AP009380 | PGN_0651 | conserved hypothetical protein                                     |       | 711069 | 711161 | 93 forward   | 0.346 | -1.530 | 0.000 | 0.002 | 0.410 | -3.730 | CDS | GI:188594195 | BAG33170.1 |

|          |           |                                                                                  |        |        |              |       |        |       |       |       |        |      |              |            |
|----------|-----------|----------------------------------------------------------------------------------|--------|--------|--------------|-------|--------|-------|-------|-------|--------|------|--------------|------------|
| AP009380 | PGN_0668  | RNA-binding protein                                                              | 728247 | 728540 | 294 reverse  | 2.270 | 1.183  | 0.012 | 0.048 | 0.468 | 2.527  | CDS  | GI:188594212 | BAG33187.1 |
| AP009380 | PGN_0669  | ABC transporter ATP-binding protein                                              | 728790 | 729545 | 756 reverse  | 1.503 | 0.588  | 0.022 | 0.072 | 0.256 | 2.299  | CDS  | GI:188594213 | BAG33188.1 |
| AP009380 | PGN_0670  | probable inorganic polyphosphate(ATP-NAD kinase                                  | 729604 | 730470 | 867 reverse  | 1.303 | 0.382  | 0.160 | 0.290 | 0.272 | 1.404  | CDS  | GI:188594214 | BAG33189.1 |
| AP009380 | PGN_0671  | putative pyridoxal phosphate biosynthetic protein                                | 730548 | 731264 | 717 forward  | 1.384 | 0.469  | 0.091 | 0.199 | 0.277 | 1.692  | CDS  | GI:188594215 | BAG33190.1 |
| AP009380 | PGN_0672  | probable biopolymer transport protein                                            | 731422 | 732036 | 615 forward  | 1.713 | 0.776  | 0.027 | 0.084 | 0.350 | 2.217  | CDS  | GI:188594216 | BAG33191.1 |
| AP009380 | PGN_0673  | probable biopolymer transport protein                                            | 732033 | 732452 | 420 forward  | 1.631 | 0.706  | 0.026 | 0.084 | 0.318 | 2.220  | CDS  | GI:188594217 | BAG33192.1 |
| AP009380 | PGN_0674  | conserved hypothetical protein                                                   | 732457 | 733284 | 828 forward  | 2.116 | 1.081  | 0.001 | 0.009 | 0.332 | 3.259  | CDS  | GI:188594218 | BAG33193.1 |
| AP009380 | PGN_0675  | conserved hypothetical protein                                                   | 733299 | 733844 | 546 forward  | 2.427 | 1.279  | 0.002 | 0.016 | 0.423 | 3.027  | CDS  | GI:188594219 | BAG33194.1 |
| AP009380 | PGN_0676  | putative ribosomal protein L11 methyltransferase                                 | 733944 | 734879 | 936 reverse  | 2.017 | 1.012  | 0.012 | 0.048 | 0.401 | 2.524  | CDS  | GI:188594220 | BAG33195.1 |
| AP009380 | PGN_0677  | putative multi antimicrobial extrusion protein MatE                              | 734813 | 736177 | 1365 reverse | 1.769 | 0.823  | 0.007 | 0.032 | 0.304 | 2.708  | CDS  | GI:188594221 | BAG33196.1 |
| AP009380 | PGN_0678  | thiamine monophosphate kinase                                                    | 736170 | 737210 | 1041 reverse | 1.369 | 0.453  | 0.063 | 0.151 | 0.243 | 1.859  | CDS  | GI:188594222 | BAG33197.1 |
| AP009380 | PGN_0679  | putative tetraacyldisaccharide 4'-kinase                                         | 737216 | 738289 | 1074 reverse | 1.134 | 0.181  | 0.427 | 0.565 | 0.229 | 0.794  | CDS  | GI:188594223 | BAG33198.1 |
| AP009380 | PGN_0680  | signal peptide peptidase SppA 67k type                                           | 738319 | 740106 | 1788 reverse | 0.910 | -0.136 | 0.611 | 0.724 | 0.267 | -0.508 | CDS  | GI:188594224 | BAG33199.1 |
| AP009380 | PGN_0681  | hypothetical protein                                                             | 740195 | 740290 | 96 forward   | 0.436 | -1.197 | 0.002 | 0.012 | 0.378 | -3.162 | CDS  | GI:188594225 | BAG33200.1 |
| AP009380 | PGN_0682  | hypothetical protein                                                             | 741622 | 741762 | 141 forward  | 0.647 | -0.629 | 0.015 | 0.056 | 0.258 | -2.442 | CDS  | GI:188594226 | BAG33201.1 |
| AP009380 | PGN_0683  | TonB-linked receptor Tlr                                                         | 741759 | 743879 | 2121 reverse | 1.240 | 0.310  | 0.368 | 0.511 | 0.344 | 0.901  | CDS  | GI:188594227 | BAG33202.1 |
| AP009380 | PGN_0684  | conserved hypothetical protein with adenosylcobinamide amidohydrolase domain     | 743893 | 745056 | 1164 reverse | 0.843 | -0.246 | 0.246 | 0.391 | 0.212 | -1.159 | CDS  | GI:188594228 | BAG33203.1 |
| AP009380 | PGN_0685  | putative iron compound ABC transporter ATP-binding protein                       | 745080 | 746081 | 1002 reverse | 0.732 | -0.451 | 0.018 | 0.065 | 0.191 | -2.359 | CDS  | GI:188594229 | BAG33204.1 |
| AP009380 | PGN_0686  | putative iron compound ABC transporter permease protein                          | 746089 | 747123 | 1035 reverse | 0.742 | -0.430 | 0.207 | 0.348 | 0.341 | -1.261 | CDS  | GI:188594230 | BAG33205.1 |
| AP009380 | PGN_0687  | putative iron compound ABC transporter periplasmic iron compound-binding protein | 747120 | 748295 | 1176 reverse | 0.709 | -0.496 | 0.230 | 0.372 | 0.413 | -1.200 | CDS  | GI:188594231 | BAG33206.1 |
| AP009380 | PGN_0688  | conserved hypothetical protein                                                   | 748877 | 749461 | 585 forward  | 0.927 | -0.110 | 0.590 | 0.707 | 0.204 | -0.539 | CDS  | GI:188594232 | BAG33207.1 |
| AP009380 | PGN_0689  | conserved hypothetical protein                                                   | 749586 | 749969 | 384 reverse  | 0.895 | -0.160 | 0.518 | 0.648 | 0.248 | -0.646 | CDS  | GI:188594233 | BAG33208.1 |
| AP009380 | PGN_0690  | conserved hypothetical protein                                                   | 750076 | 750624 | 549 reverse  | 0.938 | -0.092 | 0.702 | 0.796 | 0.240 | -0.383 | CDS  | GI:188594234 | BAG33209.1 |
| AP009380 | PGN_10018 | tRNA-Leu                                                                         | 750654 | 750737 | 84 reverse   | 0.306 | -1.708 | 0.000 | 0.003 | 0.472 | -3.622 | tRNA |              |            |
| AP009380 | PGN_0691  | conserved hypothetical protein                                                   | 750904 | 751206 | 303 reverse  | 1.904 | 0.929  | 0.036 | 0.103 | 0.443 | 2.095  | CDS  | GI:188594235 | BAG33210.1 |
| AP009380 | PGN_0692  | phosphoserine phosphatase                                                        | 751218 | 752459 | 1242 reverse | 1.977 | 0.983  | 0.022 | 0.073 | 0.428 | 2.295  | CDS  | GI:188594236 | BAG33211.1 |
| AP009380 | PGN_0693  | conserved hypothetical protein                                                   | 752518 | 753690 | 1173 reverse | 1.618 | 0.694  | 0.088 | 0.196 | 0.407 | 1.704  | CDS  | GI:188594237 | BAG33212.1 |
| AP009380 | PGN_0694  | 50S ribosomal protein L34                                                        | 753943 | 754095 | 153 reverse  | 0.732 | -0.449 | 0.065 | 0.155 | 0.244 | -1.842 | CDS  | GI:188594238 | BAG33213.1 |
| AP009380 | PGN_0695  | probable septum formation protein Maf                                            | 754157 | 754756 | 600 reverse  | 1.078 | 0.109  | 0.609 | 0.723 | 0.213 | 0.511  | CDS  | GI:188594239 | BAG33214.1 |
| AP009380 | PGN_0696  | probable hydrolase                                                               | 754796 | 755317 | 522 reverse  | 1.140 | 0.189  | 0.343 | 0.494 | 0.200 | 0.947  | CDS  | GI:188594240 | BAG33215.1 |
| AP009380 | PGN_0697  | conserved hypothetical protein                                                   | 755334 | 756146 | 813 reverse  | 1.018 | 0.026  | 0.922 | 0.951 | 0.266 | 0.098  | CDS  | GI:188594241 | BAG33216.1 |
| AP009380 | PGN_0698  | probable nitroreductase                                                          | 756139 | 756693 | 555 reverse  | 0.718 | -0.479 | 0.178 | 0.312 | 0.355 | -1.347 | CDS  | GI:188594242 | BAG33217.1 |
| AP009380 | PGN_0699  | conserved hypothetical protein                                                   | 756915 | 757124 | 210 forward  | 0.874 | -0.195 | 0.713 | 0.804 | 0.529 | -0.368 | CDS  | GI:188594243 | BAG33218.1 |
| AP009380 | PGN_0700  | putative oxidoreductase Gfo/Ihh/MocA family                                      | 757343 | 758830 | 1488 forward | 1.623 | 0.699  | 0.005 | 0.027 | 0.249 | 2.810  | CDS  | GI:188594244 | BAG33219.1 |
| AP009380 | PGN_0701  | beta-galactosidase                                                               | 758844 | 762215 | 3372 forward | 1.735 | 0.795  | 0.021 | 0.072 | 0.345 | 2.305  | CDS  | GI:188594245 | BAG33220.1 |
| AP009380 | PGN_0702  | conserved hypothetical protein                                                   | 762298 | 763386 | 1089 forward | 1.577 | 0.658  | 0.111 | 0.227 | 0.412 | 1.594  | CDS  | GI:188594246 | BAG33221.1 |
| AP009380 | PGN_0703  | hypothetical protein                                                             | 763542 | 764468 | 927 forward  | 2.823 | 1.497  | 0.001 | 0.009 | 0.458 | 3.272  | CDS  | GI:188594247 | BAG33222.1 |
| AP009380 | PGN_0704  | putative tonB-linked outer membrane receptor                                     | 764983 | 767256 | 2274 forward | 1.229 | 0.298  | 0.103 | 0.216 | 0.162 | 1.633  | CDS  | GI:188594248 | BAG33223.1 |
| AP009380 | PGN_0705  | heme-binding protein FetB                                                        | 767285 | 768166 | 882 forward  | 1.202 | 0.265  | 0.394 | 0.536 | 0.311 | 0.852  | CDS  | GI:188594249 | BAG33224.1 |
| AP009380 | PGN_0706  | putative exported periplasmic protein                                            | 768284 | 769423 | 1140 forward | 1.490 | 0.575  | 0.131 | 0.254 | 0.381 | 1.510  | CDS  | GI:188594250 | BAG33225.1 |
| AP009380 | PGN_0707  | putative iron compound ABC transporter permease protein                          | 769420 | 770490 | 1071 forward | 1.647 | 0.720  | 0.028 | 0.086 | 0.327 | 2.201  | CDS  | GI:188594251 | BAG33226.1 |
| AP009380 | PGN_0708  | putative iron compound ABC transporter ATP-binding protein                       | 770534 | 771292 | 759 forward  | 1.835 | 0.876  | 0.002 | 0.016 | 0.288 | 3.040  | CDS  | GI:188594252 | BAG33227.1 |
| AP009380 | PGN_0709  | putative indolepyruvate ferredoxin oxidoreductase beta subunit                   | 771684 | 772277 | 594 reverse  | 1.522 | 0.606  | 0.042 | 0.115 | 0.299 | 2.030  | CDS  | GI:188594253 | BAG33228.1 |
| AP009380 | PGN_0710  | indolepyruvate ferredoxin oxidoreductase alpha subunit                           | 772304 | 773911 | 1608 reverse | 1.672 | 0.741  | 0.005 | 0.028 | 0.267 | 2.782  | CDS  | GI:188594254 | BAG33229.1 |
| AP009380 | PGN_0711  | putative oxidoreductase short chain dehydrogenase/reductase family               | 773989 | 774750 | 762 reverse  | 1.358 | 0.441  | 0.036 | 0.102 | 0.210 | 2.102  | CDS  | GI:188594255 | BAG33230.1 |
| AP009380 | PGN_0712  | conserved hypothetical protein                                                   | 774861 | 774998 | 138 reverse  | 0.532 | -0.910 | 0.106 | 0.219 | 0.563 | -1.617 | CDS  | GI:188594256 | BAG33231.1 |
| AP009380 | PGN_0713  | saccharopine dehydrogenase                                                       | 775178 | 776371 | 1194 forward | 1.155 | 0.208  | 0.377 | 0.520 | 0.236 | 0.883  | CDS  | GI:188594257 | BAG33232.1 |
| AP009380 | PGN_0714  | probable pyrazinamidase/nicotinamidase                                           | 776408 | 776920 | 513 forward  | 1.172 | 0.229  | 0.437 | 0.575 | 0.294 | 0.778  | CDS  | GI:188594258 | BAG33233.1 |
| AP009380 | PGN_0715  | outer membrane efflux protein                                                    | 777123 | 778457 | 1335 forward | 0.508 | -0.977 | 0.011 | 0.046 | 0.384 | -2.547 | CDS  | GI:188594259 | BAG33234.1 |
| AP009380 | PGN_0716  | ABC transporter permease                                                         | 778497 | 779750 | 1254 forward | 0.712 | -0.491 | 0.193 | 0.332 | 0.377 | -1.302 | CDS  | GI:188594260 | BAG33235.1 |
| AP009380 | PGN_0717  | conserved hypothetical protein                                                   | 779851 | 780198 | 348 reverse  | 0.547 | -0.871 | 0.068 | 0.160 | 0.478 | -1.822 | CDS  | GI:188594261 | BAG33236.1 |
| AP009380 | PGN_0718  | putative ABC transporter permease protein                                        | 780400 | 782751 | 2352 forward | 0.474 | -1.078 | 0.000 | 0.002 | 0.287 | -3.749 | CDS  | GI:188594262 | BAG33237.1 |
| AP009380 | PGN_0719  | probable ABC transporter permease protein                                        | 782790 | 785159 | 2370 forward | 0.551 | -0.860 | 0.001 | 0.006 | 0.254 | -3.390 | CDS  | GI:188594263 | BAG33238.1 |
| AP009380 | PGN_0720  | putative ABC transporter permease protein                                        | 785186 | 787561 | 2376 forward | 0.576 | -0.795 | 0.007 | 0.034 | 0.297 | -2.679 | CDS  | GI:188594264 | BAG33239.1 |
| AP009380 | PGN_0721  | putative ABC transporter ATP-binding protein                                     | 787654 | 788313 | 660 forward  | 0.505 | -0.985 | 0.000 | 0.000 | 0.225 | -4.379 | CDS  | GI:188594265 | BAG33240.1 |
| AP009380 | PGN_0722  | conserved hypothetical protein                                                   | 788619 | 790172 | 1554 reverse | 0.969 | -0.046 | 0.800 | 0.866 | 0.181 | -0.253 | CDS  | GI:188594266 | BAG33241.1 |
| AP009380 | PGN_0723  | succinate-semialdehyde dehydrogenase                                             | 790656 | 792011 | 1356 reverse | 2.507 | 1.326  | 0.002 | 0.012 | 0.420 | 3.154  | CDS  | GI:188594267 | BAG33242.1 |
| AP009380 | PGN_0724  | NAD-dependent 4-hydroxybutyrate dehydrogenase                                    | 792207 | 793322 | 1116 reverse | 1.206 | 0.270  | 0.371 | 0.514 | 0.302 | 0.894  | CDS  | GI:188594268 | BAG33243.1 |
| AP009380 | PGN_0725  | 4-hydroxybutyrate CoA-transferase                                                | 793373 | 794668 | 1296 reverse | 1.215 | 0.281  | 0.332 | 0.482 | 0.289 | 0.970  | CDS  | GI:188594269 | BAG33244.1 |
| AP009380 | PGN_0726  | conserved hypothetical protein                                                   | 794674 | 794958 | 285 reverse  | 0.991 | -0.014 | 0.958 | 0.970 | 0.256 | -0.053 | CDS  | GI:188594270 | BAG33245.1 |
| AP009380 | PGN_0727  | 4-hydroxybutyryl-CoA dehydratase                                                 | 795031 | 796491 | 1461 reverse | 0.695 | -0.525 | 0.046 | 0.122 | 0.264 | -1.992 | CDS  | GI:188594271 | BAG33246.1 |
| AP009380 | PGN_0728  | outer membrane protein 40 precursor                                              | 797192 | 798334 | 1143 reverse | 0.576 | -0.795 | 0.029 | 0.090 | 0.364 | -2.182 | CDS  | GI:188594272 | BAG33247.1 |
| AP009380 | PGN_0729  | outer membrane protein 41 precursor                                              | 798381 | 799556 | 1176 reverse | 0.520 | -0.943 | 0.003 | 0.018 | 0.318 | -2.968 | CDS  | GI:188594273 | BAG33248.1 |
| AP009380 | PGN_0730  | hypothetical protein                                                             | 799607 | 799699 | 93 reverse   | 0.413 | -1.274 | 0.000 | 0.003 | 0.352 | -3.618 | CDS  | GI:188594274 | BAG33249.1 |
| AP009380 | PGN_0731  | hypothetical protein                                                             | 799718 | 799843 | 126 reverse  | 1.116 | 0.158  | 0.499 | 0.633 | 0.234 | 0.676  | CDS  | GI:188594275 | BAG33250.1 |
| AP009380 | PGN_0732  | conserved hypothetical protein                                                   | 799865 | 800848 | 984 reverse  | 1.097 | 0.133  | 0.471 | 0.609 | 0.185 | 0.720  | CDS  | GI:188594276 | BAG33251.1 |
| AP009380 | PGN_0733  | alpha-glucan phosphorylase                                                       | 800880 | 803450 | 2571 forward | 1.170 | 0.227  | 0.261 | 0.40  |       |        |      |              |            |

|          |           |                                                       |        |        |              |       |        |       |       |       |        |      |              |            |
|----------|-----------|-------------------------------------------------------|--------|--------|--------------|-------|--------|-------|-------|-------|--------|------|--------------|------------|
| AP009380 | PGN_0754  | conserved hypothetical protein                        | 826263 | 826871 | 609 forward  | 1.082 | 0.114  | 0.600 | 0.715 | 0.217 | 0.524  | CDS  | GI:188594298 | BAG33273.1 |
| AP009380 | PGN_0755  | hypothetical protein                                  | 826991 | 827188 | 198 forward  | 1.440 | 0.527  | 0.167 | 0.299 | 0.381 | 1.382  | CDS  | GI:188594299 | BAG33274.1 |
| AP009380 | PGN_0756  | prolyl oligopeptidase                                 | 827536 | 829590 | 2055 forward | 1.575 | 0.655  | 0.006 | 0.029 | 0.237 | 2.759  | CDS  | GI:188594300 | BAG33275.1 |
| AP009380 | PGN_0757  | conserved hypothetical protein                        | 829675 | 830301 | 627 forward  | 1.503 | 0.588  | 0.017 | 0.062 | 0.246 | 2.387  | CDS  | GI:188594301 | BAG33276.1 |
| AP009380 | PGN_0758  | conserved hypothetical protein                        | 830368 | 830757 | 390 reverse  | 2.925 | 1.548  | 0.003 | 0.016 | 0.513 | 3.020  | CDS  | GI:188594302 | BAG33277.1 |
| AP009380 | PGN_0759  | conserved hypothetical protein                        | 831006 | 832166 | 1161 reverse | 1.467 | 0.553  | 0.106 | 0.219 | 0.342 | 1.618  | CDS  | GI:188594303 | BAG33278.1 |
| AP009380 | PGN_0760  | putative D-alanine-D-alanine ligase                   | 832191 | 833183 | 993 reverse  | 1.344 | 0.427  | 0.174 | 0.307 | 0.314 | 1.361  | CDS  | GI:188594304 | BAG33279.1 |
| AP009380 | PGN_0761  | ribosomal large subunit pseudouridine synthase        | 833250 | 834347 | 1098 reverse | 1.073 | 0.102  | 0.643 | 0.750 | 0.221 | 0.463  | CDS  | GI:188594305 | BAG33280.1 |
| AP009380 | PGN_0762  | conserved hypothetical protein                        | 834385 | 835041 | 657 reverse  | 0.900 | -0.152 | 0.540 | 0.666 | 0.248 | -0.613 | CDS  | GI:188594306 | BAG33281.1 |
| AP009380 | PGN_0763  | conserved hypothetical protein                        | 835036 | 835353 | 318 forward  | 0.648 | -0.625 | 0.097 | 0.209 | 0.377 | -1.658 | CDS  | GI:188594307 | BAG33282.1 |
| AP009380 | PGN_0764  | putative riboflavin synthase alpha subunit            | 835634 | 836236 | 603 forward  | 1.474 | 0.559  | 0.020 | 0.068 | 0.240 | 2.333  | CDS  | GI:188594308 | BAG33283.1 |
| AP009380 | PGN_0765  | probable nitroreductase                               | 836233 | 836784 | 552 forward  | 1.687 | 0.754  | 0.002 | 0.016 | 0.249 | 3.032  | CDS  | GI:188594309 | BAG33284.1 |
| AP009380 | PGN_0766  | aminotransferase class V                              | 836843 | 838057 | 1215 forward | 2.431 | 1.282  | 0.001 | 0.005 | 0.368 | 3.480  | CDS  | GI:188594310 | BAG33285.1 |
| AP009380 | PGN_0767  | putative ribonuclease HII                             | 838068 | 838673 | 606 forward  | 1.886 | 0.915  | 0.016 | 0.059 | 0.379 | 2.413  | CDS  | GI:188594311 | BAG33286.1 |
| AP009380 | PGN_0768  | conserved hypothetical protein                        | 838648 | 838926 | 279 forward  | 1.098 | 0.135  | 0.630 | 0.739 | 0.280 | 0.482  | CDS  | GI:188594312 | BAG33287.1 |
| AP009380 | PGN_0769  | putative cytosine/adenosine deaminase                 | 838923 | 839375 | 453 forward  | 1.411 | 0.496  | 0.106 | 0.219 | 0.307 | 1.616  | CDS  | GI:188594313 | BAG33288.1 |
| AP009380 | PGN_0770  | conserved hypothetical protein                        | 839407 | 840321 | 915 forward  | 1.421 | 0.507  | 0.063 | 0.151 | 0.273 | 1.861  | CDS  | GI:188594314 | BAG33289.1 |
| AP009380 | PGN_0771  | conserved hypothetical protein                        | 840296 | 840865 | 570 forward  | 1.338 | 0.420  | 0.239 | 0.383 | 0.356 | 1.178  | CDS  | GI:188594315 | BAG33290.1 |
| AP009380 | PGN_0772  | probable tRNA <sup>Pro</sup> methyltransferase        | 841665 | 842429 | 765 reverse  | 1.665 | 0.736  | 0.015 | 0.056 | 0.301 | 2.444  | CDS  | GI:188594316 | BAG33291.1 |
| AP009380 | PGN_0773  | putative lactoylglutathione lyase                     | 842514 | 842912 | 399 reverse  | 1.552 | 0.634  | 0.067 | 0.157 | 0.346 | 1.832  | CDS  | GI:188594317 | BAG33292.1 |
| AP009380 | PGN_0774  | two-component system sensor histidine kinase          | 843068 | 844405 | 1338 reverse | 1.796 | 0.845  | 0.004 | 0.021 | 0.290 | 2.913  | CDS  | GI:188594318 | BAG33293.1 |
| AP009380 | PGN_0775  | two-component system response regulator               | 844431 | 845825 | 1395 reverse | 1.277 | 0.353  | 0.255 | 0.401 | 0.310 | 1.139  | CDS  | GI:188594319 | BAG33294.1 |
| AP009380 | PGN_0776  | conserved hypothetical protein                        | 846070 | 846186 | 117 reverse  | 0.697 | -0.522 | 0.227 | 0.369 | 0.432 | -1.208 | CDS  | GI:188594320 | BAG33295.1 |
| AP009380 | PGN_10019 | tRNA-Arg                                              | 846341 | 846417 | 77 reverse   | 0.370 | -1.435 | 0.001 | 0.011 | 0.450 | -3.189 | tRNA |              |            |
| AP009380 | PGN_0777  | probable glycosyl transferase                         | 846478 | 847224 | 747 reverse  | 1.335 | 0.417  | 0.058 | 0.143 | 0.220 | 1.894  | CDS  | GI:188594321 | BAG33296.1 |
| AP009380 | PGN_0778  | Por secretion system protein porT/sprT                | 847377 | 848111 | 735 reverse  | 1.888 | 0.917  | 0.000 | 0.000 | 0.217 | 4.216  | CDS  | GI:188594322 | BAG33297.1 |
| AP009380 | PGN_0779  | probable uracil phosphoribosyltransferase             | 848250 | 848900 | 651 forward  | 1.321 | 0.401  | 0.116 | 0.234 | 0.255 | 1.571  | CDS  | GI:188594323 | BAG33298.1 |
| AP009380 | PGN_0780  | PrtQ protease                                         | 848884 | 850791 | 1908 forward | 0.768 | -0.380 | 0.155 | 0.284 | 0.267 | -1.423 | CDS  | GI:188594324 | BAG33299.1 |
| AP009380 | PGN_0781  | DNA topoisomerase I                                   | 851527 | 853893 | 2367 forward | 1.439 | 0.525  | 0.111 | 0.227 | 0.329 | 1.594  | CDS  | GI:188594325 | BAG33300.1 |
| AP009380 | PGN_0782  | putative tRNA pseudouridine synthase A                | 853897 | 854655 | 759 forward  | 0.979 | -0.030 | 0.921 | 0.951 | 0.303 | -0.100 | CDS  | GI:188594326 | BAG33301.1 |
| AP009380 | PGN_0783  | putative DNA-binding protein histone-like family      | 855387 | 855869 | 483 forward  | 0.666 | -0.587 | 0.084 | 0.188 | 0.340 | -1.726 | CDS  | GI:188594327 | BAG33302.1 |
| AP009380 | PGN_0784  | hypothetical protein                                  | 856085 | 857338 | 1254 forward | 0.606 | -0.723 | 0.044 | 0.118 | 0.359 | -2.015 | CDS  | GI:188594328 | BAG33303.1 |
| AP009380 | PGN_0785  | hypothetical protein                                  | 857556 | 857897 | 342 forward  | 1.485 | 0.570  | 0.214 | 0.357 | 0.460 | 1.241  | CDS  | GI:188594329 | BAG33304.1 |
| AP009380 | PGN_0786  | conserved hypothetical protein                        | 858011 | 859363 | 1353 reverse | 2.268 | 1.182  | 0.008 | 0.037 | 0.447 | 2.646  | CDS  | GI:188594330 | BAG33305.1 |
| AP009380 | PGN_0787  | conserved hypothetical protein                        | 859413 | 860060 | 648 reverse  | 2.095 | 1.067  | 0.013 | 0.050 | 0.427 | 2.497  | CDS  | GI:188594331 | BAG33306.1 |
| AP009380 | PGN_0788  | peptidyl-dipeptidase                                  | 860157 | 862283 | 2127 reverse | 1.225 | 0.293  | 0.386 | 0.529 | 0.338 | 0.867  | CDS  | GI:188594332 | BAG33307.1 |
| AP009380 | PGN_0789  | conserved hypothetical protein                        | 862322 | 864460 | 2139 reverse | 1.261 | 0.335  | 0.170 | 0.303 | 0.244 | 1.373  | CDS  | GI:188594333 | BAG33308.1 |
| AP009380 | PGN_0790  | transposase in ISPg3                                  | 864734 | 865636 | 903 forward  | 0.667 | -0.583 | 0.096 | 0.207 | 0.351 | -1.662 | CDS  | GI:188594334 | BAG33309.1 |
| AP009380 | PGN_0791  | putative cell division trigger factor                 | 866097 | 867569 | 1473 forward | 1.813 | 0.859  | 0.018 | 0.065 | 0.363 | 2.367  | CDS  | GI:188594335 | BAG33310.1 |
| AP009380 | PGN_0792  | polyribonucleotide nucleotidyltransferase             | 868221 | 870545 | 2325 reverse | 1.323 | 0.403  | 0.144 | 0.269 | 0.276 | 1.460  | CDS  | GI:188594336 | BAG33311.1 |
| AP009380 | PGN_0793  | 4-alpha-glucanotransferase                            | 870605 | 873298 | 2694 reverse | 1.226 | 0.294  | 0.192 | 0.331 | 0.225 | 1.305  | CDS  | GI:188594337 | BAG33312.1 |
| AP009380 | PGN_0794  | conserved hypothetical protein                        | 873323 | 874429 | 1107 reverse | 1.091 | 0.125  | 0.623 | 0.733 | 0.254 | 0.492  | CDS  | GI:188594338 | BAG33313.1 |
| AP009380 | PGN_0795  | conserved hypothetical protein                        | 874603 | 876744 | 2142 reverse | 1.251 | 0.323  | 0.397 | 0.538 | 0.381 | 0.847  | CDS  | GI:188594339 | BAG33314.1 |
| AP009380 | PGN_0796  | hypothetical protein                                  | 877005 | 877154 | 150 forward  | 0.286 | -1.805 | 0.002 | 0.014 | 0.587 | -3.075 | CDS  | GI:188594340 | BAG33315.1 |
| AP009380 | PGN_0797  | conserved hypothetical protein                        | 877161 | 877298 | 138 forward  | 0.465 | -1.105 | 0.060 | 0.146 | 0.588 | -1.880 | CDS  | GI:188594341 | BAG33316.1 |
| AP009380 | PGN_0798  | conserved hypothetical protein                        | 877785 | 878915 | 1131 reverse | 1.022 | 0.032  | 0.901 | 0.940 | 0.257 | 0.125  | CDS  | GI:188594342 | BAG33317.1 |
| AP009380 | PGN_10020 | tRNA-Pro                                              | 879184 | 879261 | 78 forward   | 0.383 | -1.383 | 0.000 | 0.000 | 0.317 | -4.369 | tRNA |              |            |
| AP009380 | PGN_0799  | putative acyl-CoA dehydrogenase                       | 879406 | 881127 | 1722 reverse | 1.137 | 0.185  | 0.415 | 0.553 | 0.226 | 0.816  | CDS  | GI:188594343 | BAG33318.1 |
| AP009380 | PGN_0800  | putative electron transfer flavoprotein alpha subunit | 881139 | 882158 | 1020 reverse | 0.992 | -0.012 | 0.958 | 0.970 | 0.219 | -0.053 | CDS  | GI:188594344 | BAG33319.1 |
| AP009380 | PGN_0801  | probable electron transfer flavoprotein beta subunit  | 882167 | 883033 | 867 reverse  | 1.011 | 0.015  | 0.930 | 0.955 | 0.176 | 0.087  | CDS  | GI:188594345 | BAG33320.1 |
| AP009380 | PGN_0802  | probable glycoprotease                                | 883124 | 883843 | 720 reverse  | 0.829 | -0.271 | 0.155 | 0.284 | 0.191 | -1.421 | CDS  | GI:188594346 | BAG33321.1 |
| AP009380 | PGN_0803  | conserved hypothetical protein                        | 884073 | 884546 | 474 reverse  | 1.399 | 0.484  | 0.048 | 0.125 | 0.245 | 1.975  | CDS  | GI:188594347 | BAG33322.1 |
| AP009380 | PGN_0804  | conserved hypothetical protein                        | 884562 | 885176 | 615 reverse  | 1.399 | 0.484  | 0.067 | 0.157 | 0.264 | 1.832  | CDS  | GI:188594348 | BAG33323.1 |
| AP009380 | PGN_0805  | conserved hypothetical protein                        | 885212 | 885682 | 471 reverse  | 1.438 | 0.524  | 0.063 | 0.151 | 0.282 | 1.860  | CDS  | GI:188594349 | BAG33324.1 |
| AP009380 | PGN_0806  | putative MotA/TolQ/ExbB proton channel protein        | 885691 | 886503 | 813 reverse  | 1.341 | 0.423  | 0.142 | 0.267 | 0.288 | 1.467  | CDS  | GI:188594350 | BAG33325.1 |
| AP009380 | PGN_10021 | tRNA-Ser                                              | 886571 | 886658 | 88 reverse   | 0.511 | -0.968 | 0.000 | 0.003 | 0.262 | -3.699 | tRNA |              |            |
| AP009380 | PGN_0807  | putative DNase related protein                        | 886851 | 887678 | 828 reverse  | 1.859 | 0.894  | 0.013 | 0.052 | 0.361 | 2.475  | CDS  | GI:188594351 | BAG33326.1 |
| AP009380 | PGN_0808  | probable isoprenyl synthetase                         | 887725 | 888702 | 978 reverse  | 1.409 | 0.495  | 0.176 | 0.309 | 0.366 | 1.353  | CDS  | GI:188594352 | BAG33327.1 |
| AP009380 | PGN_0809  | putative TonB protein                                 | 888873 | 889565 | 693 reverse  | 1.166 | 0.222  | 0.253 | 0.399 | 0.194 | 1.142  | CDS  | GI:188594353 | BAG33328.1 |
| AP009380 | PGN_0810  | conserved hypothetical protein                        | 889699 | 889941 | 243 forward  | 1.521 | 0.605  | 0.182 | 0.317 | 0.453 | 1.336  | CDS  | GI:188594354 | BAG33329.1 |
| AP009380 | PGN_0811  | conserved hypothetical protein                        | 890017 | 892635 | 2619 reverse | 2.149 | 1.103  | 0.007 | 0.033 | 0.409 | 2.696  | CDS  | GI:188594355 | BAG33330.1 |
| AP009380 | PGN_0812  | conserved hypothetical protein                        | 892676 | 893392 | 717 reverse  | 1.358 | 0.442  | 0.193 | 0.331 | 0.339 | 1.303  | CDS  | GI:188594356 | BAG33331.1 |
| AP009380 | PGN_0813  | GTP-binding protein                                   | 893373 | 894557 | 1185 reverse | 1.305 | 0.384  | 0.051 | 0.130 | 0.197 | 1.952  | CDS  | GI:188594357 | BAG33332.1 |
| AP009380 | PGN_0814  | probable adenylate kinase                             | 894567 | 895151 | 585 reverse  | 1.251 | 0.323  | 0.110 | 0.226 | 0.262 | 1.596  | CDS  | GI:188594358 | BAG33333.1 |
| AP009380 | PGN_0815  | putative hypoxanthine phosphoribosyltransferase       | 895152 | 895688 | 537 reverse  | 1.432 | 0.518  | 0.035 | 0.101 | 0.246 | 2.107  | CDS  | GI:188594359 | BAG33334.1 |
| AP009380 | PGN_0816  | fructose-1,6-bisphosphatase                           | 896282 | 898279 | 1998 forward | 1.140 | 0.190  | 0.476 | 0.613 | 0.266 | 0.713  | CDS  | GI:188594360 | BAG33335.1 |
| AP009380 | PGN_0817  | penicillin-binding protein 1A                         | 898435 | 900789 | 2355 forward | 1.820 | 0.864  | 0.012 | 0.048 | 0.342 | 2.523  | CDS  | GI:188594361 | BAG33336.1 |
| AP009380 | PGN_0818  | conserved hypothetical protein                        | 900837 | 901547 | 711 forward  | 1.969 | 0.977  | 0.001 | 0.009 | 0.300 | 3.260  | CDS  | GI:188594362 | BAG33337.1 |
| AP009380 | PGN_0819  | leucyl-tRNA synthetase                                | 901712 | 904489 | 2778 reverse | 0.791 | -0.338 | 0.082 | 0.183 | 0.194 | -1.742 | CDS  | GI:188594363 | BAG33338.1 |
| AP009380 | PGN_0820  | hypothetical protein                                  | 904586 | 904750 | 165 forward  | 0.592 | -0.756 | 0.006 | 0.029 | 0.273 | -2.767 | CDS  | GI:188594364 | BAG33339.1 |
| AP009380 | PGN_0821  | hypothetical protein                                  | 905494 | 905643 | 150 reverse  | 0.717 | -0.480 | 0.383 | 0.525 | 0.549 | -0.873 | CDS  | GI:188594365 | BAG33340.1 |
| AP009380 | PGN_0822  | conserved hypothetical protein                        | 905691 | 905876 | 186 forward  | 0.411 | -1.283 | 0.012 | 0.048 | 0.509 | -2.519 | CDS  | GI:188594366 | BAG33341.1 |
| AP009380 | PGN_10022 | tRNA-Gly                                              | 905888 | 905960 | 73 reverse   | 0.359 | -1.476 | 0.001 | 0.010 | 0.458 | -3.220 | tRNA |              |            |
| AP009380 | PGN_0823  | NAD-utilizing dehydrogenases                          | 906026 | 907585 | 1560 reverse | 1.052 | 0.073  | 0.746 | 0.825 | 0.225 | 0.324  | CDS  | GI:188594367 | BAG33342.1 |
| AP009380 | PGN_0824  | tRNA nucleotidyltransferase                           | 907570 | 909021 |              |       |        |       |       |       |        |      |              |            |

|          |           |                                                                                           |      |         |         |              |       |        |       |       |       |        |      |              |            |
|----------|-----------|-------------------------------------------------------------------------------------------|------|---------|---------|--------------|-------|--------|-------|-------|-------|--------|------|--------------|------------|
| AP009380 | PGN_0837  | conserved hypothetical protein                                                            |      | 929571  | 930287  | 717 reverse  | 0.565 | -0.823 | 0.082 | 0.184 | 0.473 | -1.738 | CDS  | GI:188594381 | BAG33356.1 |
| AP009380 | PGN_0838  | conserved hypothetical protein                                                            |      | 930384  | 930596  | 213 reverse  | 0.527 | -0.925 | 0.059 | 0.144 | 0.490 | -1.887 | CDS  | GI:188594382 | BAG33357.1 |
| AP009380 | PGN_0839  | transposase in ISPg2                                                                      |      | 930874  | 931980  | 1107 reverse | 1.483 | 0.569  | 0.122 | 0.242 | 0.368 | 1.546  | CDS  | GI:188594383 | BAG33358.1 |
| AP009380 | PGN_0840  | conserved hypothetical protein                                                            |      | 932089  | 932283  | 195 forward  | 0.662 | -0.595 | 0.098 | 0.210 | 0.360 | -1.653 | CDS  | GI:188594384 | BAG33359.1 |
| AP009380 | PGN_0841  | putative 4-diphosphocytidylyl-2C-methyl-D-erythritol synthase                             |      | 932280  | 932948  | 669 forward  | 0.771 | -0.375 | 0.205 | 0.345 | 0.296 | -1.268 | CDS  | GI:188594385 | BAG33360.1 |
| AP009380 | PGN_10023 | tRNA-Asp                                                                                  |      | 933331  | 933407  | 77 forward   | 0.416 | -1.266 | 0.004 | 0.021 | 0.435 | -2.907 | tRNA |              |            |
| AP009380 | PGN_0842  | transposase in ISPg1                                                                      |      | 933734  | 934819  | 1086 reverse | 0.634 | -0.658 | 0.145 | 0.270 | 0.451 | -1.457 | CDS  | GI:188594386 | BAG33361.1 |
| AP009380 | PGN_0843  | conserved hypothetical protein                                                            |      | 935043  | 935576  | 534 forward  | 0.570 | -0.812 | 0.002 | 0.015 | 0.266 | -3.050 | CDS  | GI:188594387 | BAG33362.1 |
| AP009380 | PGN_0844  | conserved hypothetical protein                                                            |      | 935603  | 936061  | 459 forward  | 0.486 | -1.041 | 0.005 | 0.027 | 0.371 | -2.803 | CDS  | GI:188594388 | BAG33363.1 |
| AP009380 | PGN_0845  | conserved hypothetical protein                                                            |      | 936419  | 936778  | 360 forward  | 0.494 | -1.019 | 0.040 | 0.111 | 0.496 | -2.054 | CDS  | GI:188594389 | BAG33364.1 |
| AP009380 | PGN_0846  | conserved hypothetical protein                                                            |      | 936785  | 937306  | 522 forward  | 0.605 | -0.724 | 0.055 | 0.137 | 0.378 | -1.918 | CDS  | GI:188594390 | BAG33365.1 |
| AP009380 | PGN_0847  | conserved hypothetical protein                                                            |      | 937319  | 937546  | 228 forward  | 0.630 | -0.667 | 0.052 | 0.132 | 0.344 | -1.939 | CDS  | GI:188594391 | BAG33366.1 |
| AP009380 | PGN_0848  | conserved hypothetical protein                                                            |      | 937569  | 937850  | 282 forward  | 0.577 | -0.793 | 0.015 | 0.057 | 0.326 | -2.432 | CDS  | GI:188594392 | BAG33367.1 |
| AP009380 | PGN_0849  | conserved hypothetical protein                                                            |      | 937863  | 938165  | 303 forward  | 0.516 | -0.954 | 0.005 | 0.027 | 0.340 | -2.805 | CDS  | GI:188594393 | BAG33368.1 |
| AP009380 | PGN_0850  | conserved hypothetical protein                                                            |      | 938178  | 938309  | 132 forward  | 0.845 | -0.243 | 0.444 | 0.583 | 0.318 | -0.765 | CDS  | GI:188594394 | BAG33369.1 |
| AP009380 | PGN_0851  | conserved hypothetical protein                                                            |      | 938363  | 938593  | 231 forward  | 0.770 | -0.378 | 0.116 | 0.235 | 0.241 | -1.570 | CDS  | GI:188594395 | BAG33370.1 |
| AP009380 | PGN_0852  | immunoreactive 47 kDa antigen                                                             |      | 938887  | 940173  | 1287 reverse | 0.688 | -0.540 | 0.029 | 0.090 | 0.248 | -2.180 | CDS  | GI:188594396 | BAG33371.1 |
| AP009380 | PGN_0853  | conserved hypothetical protein                                                            |      | 940236  | 940346  | 111 forward  | 0.581 | -0.782 | 0.023 | 0.076 | 0.345 | -2.269 | CDS  | GI:188594397 | BAG33372.1 |
| AP009380 | PGN_0854  | hypothetical protein                                                                      |      | 941025  | 941138  | 114 reverse  | 0.616 | -0.700 | 0.003 | 0.018 | 0.236 | -2.970 | CDS  | GI:188594398 | BAG33373.1 |
| AP009380 | PGN_0855  | hypothetical protein                                                                      |      | 941192  | 941329  | 138 reverse  | 0.689 | -0.537 | 0.227 | 0.369 | 0.445 | -1.207 | CDS  | GI:188594399 | BAG33374.1 |
| AP009380 | PGN_0856  | putative A/G-specific adenine glycosylase                                                 |      | 941353  | 942576  | 1224 reverse | 1.214 | 0.280  | 0.262 | 0.409 | 0.250 | 1.121  | CDS  | GI:188594400 | BAG33375.1 |
| AP009380 | PGN_0857  | conserved hypothetical protein                                                            |      | 942626  | 943564  | 939 forward  | 0.898 | -0.155 | 0.441 | 0.579 | 0.201 | -0.771 | CDS  | GI:188594401 | BAG33376.1 |
| AP009380 | PGN_0858  | probable ABC transporter ATP-binding protein                                              |      | 943616  | 944314  | 699 forward  | 1.343 | 0.426  | 0.104 | 0.218 | 0.262 | 1.626  | CDS  | GI:188594402 | BAG33377.1 |
| AP009380 | PGN_0859  | probable ABC transporter permease protein                                                 |      | 944311  | 945060  | 750 forward  | 1.322 | 0.403  | 0.162 | 0.292 | 0.288 | 1.400  | CDS  | GI:188594403 | BAG33378.1 |
| AP009380 | PGN_0860  | conserved hypothetical protein                                                            |      | 945110  | 946159  | 1050 forward | 2.682 | 1.423  | 0.001 | 0.006 | 0.417 | 3.409  | CDS  | GI:188594404 | BAG33379.1 |
| AP009380 | PGN_0861  | conserved hypothetical protein                                                            |      | 946343  | 946996  | 654 forward  | 0.910 | -0.135 | 0.492 | 0.628 | 0.197 | -0.687 | CDS  | GI:188594405 | BAG33380.1 |
| AP009380 | PGN_0862  | Type III restriction enzyme, res subunit                                                  |      | 947073  | 949814  | 2742 reverse | 1.222 | 0.289  | 0.268 | 0.415 | 0.261 | 1.107  | CDS  | GI:188594406 | BAG33381.1 |
| AP009380 | PGN_0863  | DNA methylase N4/N6                                                                       |      | 949807  | 951441  | 1635 reverse | 0.969 | -0.046 | 0.819 | 0.880 | 0.201 | -0.229 | CDS  | GI:188594407 | BAG33382.1 |
| AP009380 | PGN_0864  | transposase in ISPg3                                                                      |      | 951638  | 952540  | 903 forward  | 0.680 | -0.556 | 0.092 | 0.201 | 0.330 | -1.686 | CDS  | GI:188594408 | BAG33383.1 |
| AP009380 | PGN_0865  | bifunctional phosphoribosylaminoimidazolecarboxamide formyltransferase/IMP cyclohydrolase |      | 952701  | 954218  | 1518 forward | 0.619 | -0.692 | 0.043 | 0.116 | 0.342 | -2.025 | CDS  | GI:188594409 | BAG33384.1 |
| AP009380 | PGN_0866  | cell shape-determining protein MreB                                                       |      | 954321  | 955340  | 1020 forward | 0.933 | -0.100 | 0.706 | 0.798 | 0.264 | -0.378 | CDS  | GI:188594410 | BAG33385.1 |
| AP009380 | PGN_0867  | probable cell shape-determining protein MreC                                              |      | 955378  | 956265  | 888 forward  | 1.542 | 0.625  | 0.012 | 0.048 | 0.248 | 2.521  | CDS  | GI:188594411 | BAG33386.1 |
| AP009380 | PGN_0868  | conserved hypothetical protein                                                            |      | 956265  | 956783  | 519 forward  | 2.091 | 1.064  | 0.000 | 0.002 | 0.285 | 3.738  | CDS  | GI:188594412 | BAG33387.1 |
| AP009380 | PGN_0869  | penicillin-binding protein 2                                                              |      | 956776  | 958641  | 1866 forward | 1.506 | 0.591  | 0.046 | 0.122 | 0.297 | 1.993  | CDS  | GI:188594413 | BAG33388.1 |
| AP009380 | PGN_0870  | putative rod shape-determining protein RodA                                               |      | 958631  | 960088  | 1458 forward | 1.446 | 0.533  | 0.057 | 0.140 | 0.280 | 1.904  | CDS  | GI:188594414 | BAG33389.1 |
| AP009380 | PGN_0871  | conserved hypothetical protein                                                            |      | 960116  | 961327  | 1212 reverse | 0.845 | -0.243 | 0.242 | 0.386 | 0.207 | -1.171 | CDS  | GI:188594415 | BAG33390.1 |
| AP009380 | PGN_0872  | DNA-binding protein histone-like family                                                   |      | 961559  | 962017  | 459 forward  | 0.957 | -0.063 | 0.847 | 0.902 | 0.325 | -0.193 | CDS  | GI:188594416 | BAG33391.1 |
| AP009380 | PGN_0873  | conserved hypothetical protein                                                            |      | 962082  | 962792  | 711 forward  | 0.988 | -0.018 | 0.957 | 0.970 | 0.337 | -0.053 | CDS  | GI:188594417 | BAG33392.1 |
| AP009380 | PGN_0874  | conserved hypothetical protein                                                            |      | 962829  | 963755  | 927 forward  | 1.242 | 0.312  | 0.279 | 0.427 | 0.289 | 1.082  | CDS  | GI:188594418 | BAG33393.1 |
| AP009380 | PGN_0875  | DNA gyrase A subunit                                                                      | gyrA | 963939  | 966518  | 2580 forward | 1.550 | 0.632  | 0.004 | 0.021 | 0.217 | 2.913  | CDS  | GI:188594419 | BAG33394.1 |
| AP009380 | PGN_0876  | TPR domain protein                                                                        |      | 966552  | 967754  | 1203 forward | 1.751 | 0.808  | 0.010 | 0.043 | 0.314 | 2.575  | CDS  | GI:188594420 | BAG33395.1 |
| AP009380 | PGN_0877  | SNF2-related helicase                                                                     |      | 968346  | 971243  | 2898 forward | 1.079 | 0.110  | 0.725 | 0.809 | 0.313 | 0.352  | CDS  | GI:188594421 | BAG33396.1 |
| AP009380 | PGN_0878  | hypothetical protein                                                                      |      | 971275  | 971727  | 453 forward  | 1.750 | 0.808  | 0.043 | 0.116 | 0.399 | 2.025  | CDS  | GI:188594422 | BAG33397.1 |
| AP009380 | PGN_0879  | transposase in ISPg3                                                                      |      | 971813  | 972715  | 903 reverse  | 0.804 | -0.314 | 0.286 | 0.434 | 0.295 | -1.067 | CDS  | GI:188594423 | BAG33398.1 |
| AP009380 | PGN_0880  | tyrosine phenol-lyase                                                                     |      | 973197  | 974576  | 1380 reverse | 1.163 | 0.218  | 0.489 | 0.626 | 0.316 | 0.691  | CDS  | GI:188594424 | BAG33399.1 |
| AP009380 | PGN_0881  | conserved hypothetical protein                                                            |      | 974829  | 975956  | 1128 reverse | 1.721 | 0.783  | 0.054 | 0.135 | 0.407 | 1.926  | CDS  | GI:188594425 | BAG33400.1 |
| AP009380 | PGN_0882  | conserved hypothetical protein                                                            |      | 975971  | 976837  | 867 reverse  | 2.004 | 1.003  | 0.008 | 0.037 | 0.378 | 2.652  | CDS  | GI:188594426 | BAG33401.1 |
| AP009380 | PGN_0883  | conserved hypothetical protein                                                            |      | 976869  | 977585  | 717 reverse  | 1.799 | 0.847  | 0.042 | 0.114 | 0.416 | 2.037  | CDS  | GI:188594427 | BAG33402.1 |
| AP009380 | PGN_0884  | organic solvent tolerance protein OstA                                                    |      | 977612  | 980467  | 2856 reverse | 1.497 | 0.582  | 0.117 | 0.236 | 0.371 | 1.566  | CDS  | GI:188594428 | BAG33403.1 |
| AP009380 | PGN_0885  | probable nitroimidazole resistance protein                                                |      | 980940  | 981476  | 537 reverse  | 1.081 | 0.112  | 0.782 | 0.854 | 0.404 | 0.277  | CDS  | GI:188594429 | BAG33404.1 |
| AP009380 | PGN_0886  | putative cation efflux protein                                                            |      | 981739  | 982704  | 966 forward  | 0.939 | -0.090 | 0.725 | 0.809 | 0.256 | -0.352 | CDS  | GI:188594430 | BAG33405.1 |
| AP009380 | PGN_0887  | conserved hypothetical protein                                                            |      | 982701  | 983093  | 393 reverse  | 1.126 | 0.172  | 0.650 | 0.755 | 0.378 | 0.454  | CDS  | GI:188594431 | BAG33406.1 |
| AP009380 | PGN_0888  | conserved hypothetical protein                                                            |      | 983139  | 983234  | 96 forward   | 1.186 | 0.246  | 0.521 | 0.651 | 0.383 | 0.642  | CDS  | GI:188594432 | BAG33407.1 |
| AP009380 | PGN_0889  | potassium uptake protein TrkA                                                             |      | 983309  | 984994  | 1686 reverse | 1.298 | 0.376  | 0.271 | 0.419 | 0.342 | 1.100  | CDS  | GI:188594433 | BAG33408.1 |
| AP009380 | PGN_0890  | putative TonB-dependent outer membrane receptor protein                                   |      | 986905  | 989508  | 2604 forward | 0.965 | -0.052 | 0.815 | 0.878 | 0.222 | -0.234 | CDS  | GI:188594434 | BAG33409.1 |
| AP009380 | PGN_0891  | dioxigenase                                                                               |      | 989941  | 990882  | 942 forward  | 1.158 | 0.211  | 0.475 | 0.613 | 0.296 | 0.714  | CDS  | GI:188594435 | BAG33410.1 |
| AP009380 | PGN_0892  | hypothetical protein                                                                      |      | 990928  | 991068  | 141 forward  | 0.779 | -0.360 | 0.264 | 0.411 | 0.322 | -1.117 | CDS  | GI:188594436 | BAG33411.1 |
| AP009380 | PGN_0893  | fumarate hydratase class I anaerobic                                                      |      | 991178  | 992824  | 1647 forward | 1.474 | 0.559  | 0.100 | 0.212 | 0.340 | 1.644  | CDS  | GI:188594437 | BAG33412.1 |
| AP009380 | PGN_0894  | DNA polymerase III, gamma and tau subunits                                                |      | 992947  | 994755  | 1809 forward | 1.026 | 0.037  | 0.879 | 0.925 | 0.244 | 0.153  | CDS  | GI:188594438 | BAG33413.1 |
| AP009380 | PGN_0895  | ferredoxin 4Fe-4S                                                                         |      | 995192  | 995362  | 171 reverse  | 0.367 | -1.447 | 0.000 | 0.001 | 0.349 | -4.147 | CDS  | GI:188594439 | BAG33414.1 |
| AP009380 | PGN_0896  | probable D-alanyl-D-alanine carboxypeptidase                                              |      | 995698  | 997200  | 1503 reverse | 0.839 | -0.253 | 0.348 | 0.497 | 0.270 | -0.939 | CDS  | GI:188594440 | BAG33415.1 |
| AP009380 | PGN_0897  | conserved hypothetical protein                                                            |      | 997197  | 997397  | 201 reverse  | 0.759 | -0.397 | 0.344 | 0.494 | 0.420 | -0.946 | CDS  | GI:188594441 | BAG33416.1 |
| AP009380 | PGN_0898  | probable peptidylarginine deiminase                                                       |      | 997443  | 999113  | 1671 reverse | 1.772 | 0.826  | 0.062 | 0.150 | 0.443 | 1.863  | CDS  | GI:188594442 | BAG33417.1 |
| AP009380 | PGN_0899  | conserved hypothetical protein                                                            |      | 999285  | 999383  | 99 reverse   | 1.113 | 0.154  | 0.722 | 0.809 | 0.434 | 0.355  | CDS  | GI:188594443 | BAG33418.1 |
| AP009380 | PGN_0900  | thiol protease                                                                            |      | 1000329 | 1002860 | 2532 reverse | 2.137 | 1.096  | 0.009 | 0.040 | 0.419 | 2.615  | CDS  | GI:188594444 | BAG33419.1 |
| AP009380 | PGN_0901  | putative riboflavin synthase beta subunit                                                 |      | 100     |         |              |       |        |       |       |       |        |      |              |            |



|          |           |                                                                |      |         |         |      |         |       |        |       |       |       |        |      |              |            |
|----------|-----------|----------------------------------------------------------------|------|---------|---------|------|---------|-------|--------|-------|-------|-------|--------|------|--------------|------------|
| AP009380 | PGN_0923  | putative DNA primase                                           |      | 1028044 | 1028931 | 888  | forward | 0.509 | -0.973 | 0.003 | 0.018 | 0.327 | -2.974 | CDS  | GI:188594467 | BAG33442.1 |
| AP009380 | PGN_0924  | mobilization protein                                           |      | 1029061 | 1029423 | 363  | forward | 0.483 | -1.050 | 0.004 | 0.023 | 0.366 | -2.867 | CDS  | GI:188594468 | BAG33443.1 |
| AP009380 | PGN_0925  | putative mobilization protein                                  |      | 1029413 | 1030354 | 942  | forward | 0.485 | -1.043 | 0.000 | 0.004 | 0.292 | -3.572 | CDS  | GI:188594469 | BAG33444.1 |
| AP009380 | PGN_0926  | conserved hypothetical protein                                 |      | 1030380 | 1031102 | 723  | forward | 0.608 | -0.718 | 0.022 | 0.073 | 0.314 | -2.289 | CDS  | GI:188594470 | BAG33445.1 |
| AP009380 | PGN_0927  | conserved hypothetical protein                                 |      | 1031232 | 1031435 | 204  | forward | 0.642 | -0.640 | 0.036 | 0.102 | 0.305 | -2.100 | CDS  | GI:188594471 | BAG33446.1 |
| AP009380 | PGN_0928  | conserved hypothetical protein                                 |      | 1031507 | 1032715 | 1209 | forward | 0.848 | -0.238 | 0.192 | 0.330 | 0.182 | -1.306 | CDS  | GI:188594472 | BAG33447.1 |
| AP009380 | PGN_0929  | conserved hypothetical protein                                 |      | 1032705 | 1034606 | 1902 | forward | 0.773 | -0.371 | 0.090 | 0.198 | 0.219 | -1.697 | CDS  | GI:188594473 | BAG33448.1 |
| AP009380 | PGN_0930  | hypothetical protein                                           |      | 1034802 | 1035848 | 1047 | forward | 0.732 | -0.450 | 0.072 | 0.166 | 0.250 | -1.800 | CDS  | GI:188594474 | BAG33449.1 |
| AP009380 | PGN_0931  | conserved hypothetical protein                                 |      | 1035904 | 1036683 | 780  | forward | 0.887 | -0.173 | 0.570 | 0.690 | 0.304 | -0.569 | CDS  | GI:188594475 | BAG33450.1 |
| AP009380 | PGN_0932  | probable GCN5-related N-acetyltransferase                      |      | 1037241 | 1037696 | 456  | forward | 1.265 | 0.339  | 0.390 | 0.532 | 0.394 | 0.860  | CDS  | GI:188594476 | BAG33451.1 |
| AP009380 | PGN_0933  | probable transcriptional regulator                             |      | 1037750 | 1039207 | 1458 | forward | 1.005 | 0.008  | 0.981 | 0.984 | 0.322 | 0.024  | CDS  | GI:188594477 | BAG33452.1 |
| AP009380 | PGN_0934  | transposase in ISPg3                                           |      | 1039361 | 1040263 | 903  | forward | 0.908 | -0.139 | 0.552 | 0.676 | 0.234 | -0.595 | CDS  | GI:188594478 | BAG33453.1 |
| AP009380 | PGN_0935  | conserved hypothetical protein                                 |      | 1040509 | 1042389 | 1881 | forward | 0.837 | -0.256 | 0.343 | 0.493 | 0.270 | -0.949 | CDS  | GI:188594479 | BAG33454.1 |
| AP009380 | PGN_0936  | putative glycerate dehydrogenase                               |      | 1042630 | 1043583 | 954  | forward | 1.334 | 0.415  | 1.033 | 0.216 | 0.255 | 1.631  | CDS  | GI:188594480 | BAG33455.1 |
| AP009380 | PGN_0937  | hypothetical protein                                           |      | 1043701 | 1043811 | 111  | forward | 1.228 | 0.297  | 0.346 | 0.496 | 0.315 | 0.942  | CDS  | GI:188594481 | BAG33456.1 |
| AP009380 | PGN_0938  | 8-amino-7-oxononanoate synthase                                |      | 1043970 | 1045118 | 1149 | forward | 0.830 | -0.268 | 0.199 | 0.337 | 0.209 | -1.285 | CDS  | GI:188594482 | BAG33457.1 |
| AP009380 | PGN_0939  | conserved hypothetical protein                                 |      | 1045118 | 1045537 | 420  | forward | 0.903 | -0.148 | 0.524 | 0.652 | 0.232 | -0.638 | CDS  | GI:188594483 | BAG33458.1 |
| AP009380 | PGN_0940  | partial transposase in ISPg2                                   |      | 1045629 | 1045856 | 228  | forward | 0.855 | -0.226 | 0.362 | 0.507 | 0.249 | -0.911 | CDS  | GI:188594484 | BAG33459.1 |
| AP009380 | PGN_0941  | conserved hypothetical protein                                 |      | 1046329 | 1047720 | 1392 | forward | 0.781 | -0.356 | 0.116 | 0.233 | 0.226 | -1.574 | CDS  | GI:188594485 | BAG33460.1 |
| AP009380 | PGN_0942  | conserved hypothetical protein                                 |      | 1047725 | 1048531 | 807  | forward | 1.292 | 0.370  | 0.071 | 0.165 | 0.205 | 1.806  | CDS  | GI:188594486 | BAG33461.1 |
| AP009380 | PGN_0943  | alginate O-acetyltransferase                                   |      | 1048552 | 1050087 | 1536 | forward | 0.981 | -0.028 | 0.907 | 0.945 | 0.237 | -0.117 | CDS  | GI:188594487 | BAG33462.1 |
| AP009380 | PGN_0944  | transposase in ISPg3                                           |      | 1050241 | 1051143 | 903  | reverse | 0.795 | -0.330 | 0.199 | 0.337 | 0.257 | -1.286 | CDS  | GI:188594488 | BAG33463.1 |
| AP009380 | PGN_0945  | putative TetR family transcriptional regulator                 |      | 1052312 | 1052959 | 648  | forward | 0.772 | -0.373 | 0.195 | 0.334 | 0.288 | -1.296 | CDS  | GI:188594489 | BAG33464.1 |
| AP009380 | PGN_0946  | conserved hypothetical protein                                 |      | 1053000 | 1055405 | 2406 | forward | 0.752 | -0.411 | 0.059 | 0.144 | 0.218 | -1.887 | CDS  | GI:188594490 | BAG33465.1 |
| AP009380 | PGN_0947  | conserved hypothetical protein                                 |      | 1055483 | 1056274 | 792  | forward | 1.057 | 0.080  | 0.767 | 0.842 | 0.269 | 0.296  | CDS  | GI:188594491 | BAG33466.1 |
| AP009380 | PGN_0948  | conserved hypothetical protein                                 |      | 1056278 | 1057555 | 1278 | forward | 0.961 | -0.057 | 0.816 | 0.878 | 0.244 | -0.233 | CDS  | GI:188594492 | BAG33467.1 |
| AP009380 | PGN_0949  | ABC transporter ATP-binding protein                            |      | 1057580 | 1059334 | 1755 | forward | 1.060 | 0.083  | 0.728 | 0.811 | 0.240 | 0.347  | CDS  | GI:188594493 | BAG33468.1 |
| AP009380 | PGN_0950  | ABC transporter ATP-binding protein                            |      | 1059381 | 1061087 | 1707 | forward | 0.838 | -0.256 | 0.250 | 0.395 | 0.222 | -1.150 | CDS  | GI:188594494 | BAG33469.1 |
| AP009380 | PGN_0951  | conserved hypothetical protein                                 |      | 1061257 | 1061634 | 378  | reverse | 0.660 | -0.600 | 0.023 | 0.075 | 0.264 | -2.277 | CDS  | GI:188594495 | BAG33470.1 |
| AP009380 | PGN_0952  | carboxyl-terminal processing protease                          |      | 1061884 | 1063593 | 1710 | forward | 1.009 | 0.013  | 0.963 | 0.972 | 0.268 | 0.047  | CDS  | GI:188594496 | BAG33471.1 |
| AP009380 | PGN_0953  | transposase in ISPg3                                           |      | 1064180 | 1065082 | 903  | forward | 0.763 | -0.391 | 0.240 | 0.385 | 0.333 | -1.175 | CDS  | GI:188594497 | BAG33472.1 |
| AP009380 | PGN_0954  | partial transposase in ISPg6                                   |      | 1065426 | 1065938 | 513  | reverse | 0.427 | -1.227 | 0.000 | 0.000 | 0.280 | -4.386 | CDS  | GI:188594498 | BAG33473.1 |
| AP009380 | PGN_0955  | transposase in ISPg3                                           |      | 1066019 | 1066921 | 903  | reverse | 0.866 | -0.207 | 0.548 | 0.674 | 0.345 | -0.601 | CDS  | GI:188594499 | BAG33474.1 |
| AP009380 | PGN_0956  | hypothetical protein                                           |      | 1067028 | 1067300 | 273  | reverse | 1.045 | 0.063  | 0.795 | 0.863 | 0.242 | 0.260  | CDS  | GI:188594500 | BAG33475.1 |
| AP009380 | PGN_0957  | conserved hypothetical protein                                 |      | 1067323 | 1067865 | 543  | reverse | 1.124 | 0.169  | 0.533 | 0.659 | 0.271 | 0.624  | CDS  | GI:188594501 | BAG33476.1 |
| AP009380 | PGN_0958  | conserved hypothetical protein                                 |      | 1067870 | 1067965 | 96   | reverse | 0.675 | -0.567 | 0.120 | 0.240 | 0.365 | -1.554 | CDS  | GI:188594502 | BAG33477.1 |
| AP009380 | PGN_0959  | probable transcriptional regulator                             |      | 1067962 | 1068285 | 324  | reverse | 0.616 | -0.700 | 0.020 | 0.070 | 0.302 | -2.321 | CDS  | GI:188594503 | BAG33478.1 |
| AP009380 | PGN_0960  | conserved hypothetical protein                                 |      | 1068395 | 1069285 | 891  | reverse | 0.765 | -0.386 | 0.137 | 0.261 | 0.260 | -1.485 | CDS  | GI:188594504 | BAG33479.1 |
| AP009380 | PGN_0961  | conserved hypothetical protein                                 |      | 1069360 | 1069476 | 117  | forward | 0.471 | -1.087 | 0.019 | 0.068 | 0.465 | -2.339 | CDS  | GI:188594505 | BAG33480.1 |
| AP009380 | PGN_0962  | threonyl-tRNA synthetase                                       |      | 1070862 | 1072823 | 1962 | forward | 1.381 | 0.465  | 0.051 | 0.129 | 0.238 | 1.955  | CDS  | GI:188594506 | BAG33481.1 |
| AP009380 | PGN_0963  | translation initiation factor IF-3                             |      | 1072925 | 1073563 | 639  | forward | 1.238 | 0.308  | 0.158 | 0.287 | 0.218 | 1.412  | CDS  | GI:188594507 | BAG33482.1 |
| AP009380 | PGN_0964  | probable 50S ribosomal protein L35                             | rplM | 1073607 | 1073804 | 198  | forward | 1.208 | 0.273  | 0.163 | 0.293 | 0.195 | 1.397  | CDS  | GI:188594508 | BAG33483.1 |
| AP009380 | PGN_0965  | putative 50S ribosomal protein L20                             | rplT | 1073917 | 1074264 | 348  | forward | 1.194 | 0.255  | 0.203 | 0.343 | 0.201 | 1.272  | CDS  | GI:188594509 | BAG33484.1 |
| AP009380 | PGN_0966  | partial transposase in ISPg1                                   |      | 1074727 | 1075296 | 570  | reverse | 0.629 | -0.668 | 0.169 | 0.302 | 0.486 | -1.375 | CDS  | GI:188594510 | BAG33485.1 |
| AP009380 | PGN_0967  | partial transposase in ISPg1                                   |      | 1075517 | 1075942 | 426  | forward | 0.602 | -0.733 | 0.136 | 0.260 | 0.491 | -1.491 | CDS  | GI:188594511 | BAG33486.1 |
| AP009380 | PGN_0968  | conserved hypothetical protein                                 |      | 1076269 | 1077045 | 777  | reverse | 1.001 | 0.001  | 0.998 | 0.998 | 0.451 | 0.003  | CDS  | GI:188594512 | BAG33487.1 |
| AP009380 | PGN_0969  | conserved hypothetical protein                                 |      | 1077061 | 1077621 | 561  | reverse | 0.745 | -0.424 | 0.322 | 0.472 | 0.428 | -0.991 | CDS  | GI:188594513 | BAG33488.1 |
| AP009380 | PGN_0970  | putative RNA polymerase sigma-70 factor ECF subfamily          |      | 1077611 | 1078117 | 507  | reverse | 0.734 | -0.445 | 0.293 | 0.441 | 0.424 | -1.051 | CDS  | GI:188594514 | BAG33489.1 |
| AP009380 | PGN_0971  | transposase in ISPg1                                           |      | 1078414 | 1079499 | 1086 | forward | 0.712 | -0.490 | 0.272 | 0.419 | 0.446 | -1.099 | CDS  | GI:188594515 | BAG33490.1 |
| AP009380 | PGN_0972  | TPR domain protein                                             |      | 1079830 | 1082286 | 2457 | reverse | 0.670 | -0.578 | 0.026 | 0.083 | 0.260 | -2.223 | CDS  | GI:188594516 | BAG33491.1 |
| AP009380 | PGN_10024 | tRNA-Phe                                                       |      | 1082680 | 1082755 | 76   | reverse | 0.535 | -0.901 | 0.047 | 0.123 | 0.454 | -1.987 | tRNA |              |            |
| AP009380 | PGN_0973  | conserved hypothetical protein                                 |      | 1083418 | 1085742 | 2325 | reverse | 1.248 | 0.320  | 0.349 | 0.498 | 0.342 | 0.936  | CDS  | GI:188594517 | BAG33492.1 |
| AP009380 | PGN_0974  | putative shikimate 5-dehydrogenase                             |      | 1085770 | 1086519 | 750  | reverse | 1.798 | 0.846  | 0.027 | 0.085 | 0.383 | 2.210  | CDS  | GI:188594518 | BAG33493.1 |
| AP009380 | PGN_0975  | putative ubiquinone/menaquinone biosynthesis methyltransferase |      | 1086516 | 1087253 | 738  | reverse | 2.227 | 1.155  | 0.001 | 0.006 | 0.339 | 3.404  | CDS  | GI:188594519 | BAG33494.1 |
| AP009380 | PGN_0976  | phosphoribosylaminimidazole-succinocarboxamide synthase        |      | 1087285 | 1088226 | 942  | reverse | 1.852 | 0.889  | 0.004 | 0.023 | 0.310 | 2.869  | CDS  | GI:188594520 | BAG33495.1 |
| AP009380 | PGN_0977  | phosphate starvation-inducible PhoK-like protein               |      | 1088283 | 1089275 | 993  | reverse | 1.793 | 0.842  | 0.009 | 0.041 | 0.324 | 2.602  | CDS  | GI:188594521 | BAG33496.1 |
| AP009380 | PGN_0978  | hypothetical protein                                           |      | 1089588 | 1089680 | 93   | forward | 0.944 | -0.083 | 0.849 | 0.903 | 0.438 | -0.190 | CDS  | GI:188594522 | BAG33497.1 |
| AP009380 | PGN_0979  | hypothetical protein                                           |      | 1089723 | 1089815 | 93   | reverse | 0.778 | -0.363 | 0.536 | 0.662 | 0.586 | -0.619 | CDS  | GI:188594523 | BAG33498.1 |
| AP009380 | PGN_0980  | putative alpha-1,2-mannosidase family protein                  |      | 1089895 | 1092210 | 2316 | reverse | 0.863 | -0.212 | 0.394 | 0.536 | 0.249 | -0.852 | CDS  | GI:188594524 | BAG33499.1 |
| AP009380 | PGN_0981  | S-adenosylmethionine:tRNA ribosyltransferase-isomerase         |      | 1092349 | 1093566 | 1218 | forward | 0.647 | -0.629 | 0.014 | 0.054 | 0.255 | -2.463 | CDS  | GI:188594525 | BAG33500.1 |
| AP009380 | PGN_10025 | tRNA-Leu                                                       |      | 1093748 | 1093832 | 85   | reverse | 0.430 | -1.218 | 0.028 | 0.086 | 0.553 | -2.203 | tRNA |              |            |
| AP009380 | PGN_0982  | putative Mrr restriction system protein                        |      | 1093971 | 1094888 | 918  | reverse | 0.371 | -1.429 | 0.000 | 0.000 | 0.274 | -5.219 | CDS  | GI:188594526 | BAG33501.1 |
| AP009380 | PGN_0983  | hypothetical protein                                           |      | 1095644 | 1095754 | 111  | forward | 0.440 | -1.186 | 0.009 | 0.039 | 0.452 | -2.6   |      |              |            |

|          |           |                                                                        |        |         |         |      |         |       |        |       |       |       |        |      |              |            |
|----------|-----------|------------------------------------------------------------------------|--------|---------|---------|------|---------|-------|--------|-------|-------|-------|--------|------|--------------|------------|
| AP009380 | PGN_1008  | partial transposase in ISPg1                                           |        | 1118534 | 1119226 | 693  | forward | 0.741 | -0.432 | 0.330 | 0.480 | 0.444 | -0.973 | CDS  | GI:188594552 | BAG33527.1 |
| AP009380 | PGN_1009  | calcium-transporting ATPase                                            |        | 1119487 | 1122312 | 2826 | forward | 0.863 | -0.212 | 0.485 | 0.623 | 0.304 | -0.698 | CDS  | GI:188594553 | BAG33528.1 |
| AP009380 | PGN_1010  | conserved hypothetical protein                                         |        | 1122312 | 1123034 | 723  | forward | 1.666 | 0.737  | 0.045 | 0.120 | 0.368 | 2.003  | CDS  | GI:188594554 | BAG33529.1 |
| AP009380 | PGN_1011  | xanthine/uracil/vitamin C permease                                     |        | 1123055 | 1124356 | 1302 | forward | 1.667 | 0.737  | 0.033 | 0.098 | 0.346 | 2.127  | CDS  | GI:188594555 | BAG33530.1 |
| AP009380 | PGN_1012  | putative 4-diphosphocytidyl-2C-methyl-D-erythritol kinase              |        | 1124385 | 1125209 | 825  | forward | 1.346 | 0.428  | 0.188 | 0.326 | 0.325 | 1.316  | CDS  | GI:188594556 | BAG33531.1 |
| AP009380 | PGN_1013  | putative Fe-S oxidoreductase                                           |        | 1125188 | 1127092 | 1905 | forward | 1.880 | 0.911  | 0.018 | 0.065 | 0.385 | 2.364  | CDS  | GI:188594557 | BAG33532.1 |
| AP009380 | PGN_1014  | elongation factor G                                                    |        | 1127300 | 1129459 | 2160 | reverse | 0.985 | -0.022 | 0.918 | 0.950 | 0.213 | -0.103 | CDS  | GI:188594558 | BAG33533.1 |
| AP009380 | PGN_1015  | putative DNA polymerase III delta prime subunit                        |        | 1129703 | 1130953 | 1251 | reverse | 1.110 | 0.150  | 0.552 | 0.676 | 0.252 | 0.595  | CDS  | GI:188594559 | BAG33534.1 |
| AP009380 | PGN_1016  | conserved hypothetical protein                                         |        | 1131341 | 1131955 | 615  | forward | 1.346 | 0.428  | 0.038 | 0.106 | 0.206 | 2.080  | CDS  | GI:188594560 | BAG33535.1 |
| AP009380 | PGN_1017  | conserved hypothetical protein                                         |        | 1131963 | 1132352 | 390  | forward | 0.838 | -0.255 | 0.328 | 0.478 | 0.261 | -0.977 | CDS  | GI:188594561 | BAG33536.1 |
| AP009380 | PGN_1018  | conserved hypothetical protein                                         |        | 1132404 | 1133570 | 1167 | forward | 1.245 | 0.316  | 0.099 | 0.210 | 0.192 | 1.651  | CDS  | GI:188594562 | BAG33537.1 |
| AP009380 | PGN_1019  | Por secretion system response regulat protein porX                     | porX   | 1133660 | 1135216 | 1557 | forward | 0.879 | -0.187 | 0.415 | 0.553 | 0.229 | -0.815 | CDS  | GI:188594563 | BAG33538.1 |
| AP009380 | PGN_1020  | probable ATP/GTP-binding transmembrane protein                         |        | 1135228 | 1135644 | 417  | forward | 1.209 | 0.274  | 0.191 | 0.330 | 0.210 | 1.308  | CDS  | GI:188594564 | BAG33539.1 |
| AP009380 | PGN_1021  | hypothetical protein                                                   |        | 1135644 | 1135871 | 228  | forward | 1.295 | 0.373  | 0.101 | 0.214 | 0.227 | 1.640  | CDS  | GI:188594565 | BAG33540.1 |
| AP009380 | PGN_1022  | putative thymidine kinase                                              |        | 1135999 | 1136613 | 615  | forward | 0.879 | -0.186 | 0.510 | 0.640 | 0.283 | -0.660 | CDS  | GI:188594566 | BAG33541.1 |
| AP009380 | PGN_1023  | acid phosphatase OtpA                                                  |        | 1136610 | 1137425 | 816  | forward | 1.251 | 0.324  | 0.164 | 0.295 | 0.233 | 1.392  | CDS  | GI:188594567 | BAG33542.1 |
| AP009380 | PGN_1024  | putative ribosome-binding factor A                                     |        | 1137464 | 1137799 | 336  | forward | 1.316 | 0.396  | 0.115 | 0.232 | 0.251 | 1.578  | CDS  | GI:188594568 | BAG33543.1 |
| AP009380 | PGN_1025  | conserved hypothetical protein                                         |        | 1137827 | 1139050 | 1224 | forward | 1.232 | 0.301  | 0.282 | 0.430 | 0.280 | 1.075  | CDS  | GI:188594569 | BAG33544.1 |
| AP009380 | PGN_1026  | glycosyl transferase family 2                                          |        | 1139196 | 1139933 | 738  | forward | 1.166 | 0.222  | 0.286 | 0.434 | 0.208 | 1.066  | CDS  | GI:188594570 | BAG33545.1 |
| AP009380 | PGN_1027  | dihydroorotase                                                         |        | 1139944 | 1141293 | 1350 | forward | 1.485 | 0.570  | 0.007 | 0.034 | 0.213 | 2.682  | CDS  | GI:188594571 | BAG33546.1 |
| AP009380 | PGN_1028  | conserved hypothetical protein                                         |        | 1141553 | 1142215 | 663  | forward | 1.052 | 0.073  | 0.693 | 0.788 | 0.186 | 0.394  | CDS  | GI:188594572 | BAG33547.1 |
| AP009380 | PGN_1029  | conserved hypothetical protein                                         |        | 1142181 | 1142576 | 396  | forward | 1.476 | 0.561  | 0.042 | 0.114 | 0.276 | 2.036  | CDS  | GI:188594573 | BAG33548.1 |
| AP009380 | PGN_10026 | tRNA-Ala                                                               |        | 1142632 | 1142708 | 77   | forward | 0.710 | -0.494 | 0.196 | 0.334 | 0.382 | -1.293 | tRNA |              |            |
| AP009380 | PGN_1030  | hypothetical protein                                                   |        | 1142678 | 1142863 | 186  | forward | 0.663 | -0.594 | 0.092 | 0.200 | 0.352 | -1.688 | CDS  | GI:188594574 | BAG33549.1 |
| AP009380 | PGN_1031  | conserved hypothetical protein                                         |        | 1143165 | 1143644 | 480  | reverse | 0.370 | -1.435 | 0.001 | 0.005 | 0.416 | -3.452 | CDS  | GI:188594575 | BAG33550.1 |
| AP009380 | PGN_1032  | conserved hypothetical protein                                         |        | 1143862 | 1144575 | 714  | forward | 0.327 | -1.611 | 0.000 | 0.001 | 0.408 | -3.953 | CDS  | GI:188594576 | BAG33551.1 |
| AP009380 | PGN_1033  | O-antigen flippase                                                     | wzx    | 1144923 | 1146488 | 1562 | forward | 0.495 | -1.015 | 0.001 | 0.007 | 0.301 | -3.374 | CDS  | GI:188594577 | BAG33552.1 |
| AP009380 | PGN_1034  | conserved hypothetical protein                                         |        | 1146614 | 1147186 | 573  | forward | 1.050 | 0.070  | 0.794 | 0.862 | 0.269 | 0.262  | CDS  | GI:188594578 | BAG33553.1 |
| AP009380 | PGN_1035  | conserved hypothetical protein with DUF1063 domain                     |        | 1147241 | 1148542 | 1302 | forward | 1.205 | 0.269  | 0.335 | 0.484 | 0.279 | 0.965  | CDS  | GI:188594579 | BAG33554.1 |
| AP009380 | PGN_1036  | putative G/U mismatch-specific DNA glycosylase                         |        | 1148568 | 1149050 | 483  | forward | 1.148 | 0.199  | 0.517 | 0.647 | 0.307 | 0.648  | CDS  | GI:188594580 | BAG33555.1 |
| AP009380 | PGN_1037  | conserved hypothetical protein                                         |        | 1149162 | 1149614 | 453  | reverse | 0.859 | -0.219 | 0.344 | 0.494 | 0.232 | -0.946 | CDS  | GI:188594581 | BAG33556.1 |
| AP009380 | PGN_1038  | conserved hypothetical protein                                         |        | 1150639 | 1151181 | 543  | forward | 0.825 | -0.277 | 0.254 | 0.401 | 0.243 | -1.140 | CDS  | GI:188594582 | BAG33557.1 |
| AP009380 | PGN_1039  | putative alpha-1,2-mannosidase precursor                               |        | 1151266 | 1153533 | 2268 | forward | 1.476 | 0.562  | 0.052 | 0.132 | 0.289 | 1.944  | CDS  | GI:188594583 | BAG33558.1 |
| AP009380 | PGN_1040  | conserved hypothetical protein                                         |        | 1153713 | 1153961 | 249  | forward | 0.639 | -0.646 | 0.021 | 0.072 | 0.280 | -2.304 | CDS  | GI:188594584 | BAG33559.1 |
| AP009380 | PGN_1041  | cytochrome d ubiquinol oxidase subunit I                               |        | 1153981 | 1155570 | 1590 | forward | 0.796 | -0.329 | 0.227 | 0.369 | 0.273 | -1.207 | CDS  | GI:188594585 | BAG33560.1 |
| AP009380 | PGN_1042  | cytochrome d ubiquinol oxidase subunit II                              |        | 1155616 | 1156779 | 1164 | forward | 1.117 | 0.160  | 0.459 | 0.598 | 0.215 | 0.741  | CDS  | GI:188594586 | BAG33561.1 |
| AP009380 | PGN_1043  | conserved hypothetical protein                                         |        | 1156926 | 1157717 | 792  | forward | 1.136 | 0.184  | 0.401 | 0.541 | 0.219 | 0.841  | CDS  | GI:188594587 | BAG33562.1 |
| AP009380 | PGN_1044  | alpha-amylase                                                          |        | 1157714 | 1159408 | 1695 | forward | 1.090 | 0.124  | 0.602 | 0.717 | 0.238 | 0.521  | CDS  | GI:188594588 | BAG33563.1 |
| AP009380 | PGN_1045  | beta-galactosidase                                                     | lacZII | 1159873 | 1163079 | 3207 | reverse | 1.091 | 0.125  | 0.553 | 0.676 | 0.211 | 0.594  | CDS  | GI:188594589 | BAG33564.1 |
| AP009380 | PGN_10027 | tRNA-Met                                                               |        | 1164040 | 1164116 | 77   | reverse | 0.756 | -0.403 | 0.423 | 0.561 | 0.503 | -0.801 | tRNA |              |            |
| AP009380 | PGN_1046  | putative DNA repair protein                                            |        | 1164289 | 1164981 | 693  | forward | 1.053 | 0.075  | 0.772 | 0.846 | 0.257 | 0.290  | CDS  | GI:188594590 | BAG33565.1 |
| AP009380 | PGN_1047  | hydroxylamine reductase                                                |        | 1165206 | 1166858 | 1653 | forward | 0.734 | -0.447 | 0.109 | 0.223 | 0.278 | -1.605 | CDS  | GI:188594591 | BAG33566.1 |
| AP009380 | PGN_1048  | hypothetical protein                                                   |        | 1167592 | 1167738 | 147  | reverse | 0.915 | -0.128 | 0.689 | 0.786 | 0.319 | -0.400 | CDS  | GI:188594592 | BAG33567.1 |
| AP009380 | PGN_1049  | putative alkaline phosphatase                                          |        | 1168010 | 1169701 | 1692 | reverse | 1.279 | 0.355  | 0.255 | 0.401 | 0.312 | 1.138  | CDS  | GI:188594593 | BAG33568.1 |
| AP009380 | PGN_1050  | conserved hypothetical protein                                         |        | 1169737 | 1170933 | 1197 | reverse | 1.379 | 0.463  | 0.211 | 0.352 | 0.370 | 1.251  | CDS  | GI:188594594 | BAG33569.1 |
| AP009380 | PGN_1051  | hypothetical protein                                                   |        | 1171115 | 1171243 | 129  | reverse | 2.033 | 1.024  | 0.033 | 0.098 | 0.481 | 2.130  | CDS  | GI:188594595 | BAG33570.1 |
| AP009380 | PGN_1052  | conserved hypothetical protein                                         |        | 1171432 | 1172196 | 765  | reverse | 2.182 | 1.126  | 0.005 | 0.025 | 0.397 | 2.835  | CDS  | GI:188594596 | BAG33571.1 |
| AP009380 | PGN_1053  | putative phospho-2-dehydro-3-deoxyheptonate aldolase/chorismate mutase |        | 1172193 | 1173293 | 1101 | reverse | 1.980 | 0.986  | 0.031 | 0.093 | 0.456 | 2.160  | CDS  | GI:188594597 | BAG33572.1 |
| AP009380 | PGN_1054  | virulence modulating gene F                                            | vimF   | 1173309 | 1174559 | 1251 | reverse | 2.371 | 1.246  | 0.003 | 0.019 | 0.423 | 2.944  | CDS  | GI:188594598 | BAG33573.1 |
| AP009380 | PGN_1055  | virulence modulating gene E                                            | vimE   | 1174556 | 1175917 | 1362 | reverse | 1.819 | 0.863  | 0.022 | 0.073 | 0.376 | 2.297  | CDS  | GI:188594599 | BAG33574.1 |
| AP009380 | PGN_1056  | virulence modulating gene A                                            | vimA   | 1175914 | 1176879 | 966  | reverse | 0.867 | -0.206 | 0.378 | 0.520 | 0.234 | -0.881 | CDS  | GI:188594600 | BAG33575.1 |
| AP009380 | PGN_1057  | recombinase A                                                          | recA   | 1176953 | 1177975 | 1023 | reverse | 0.801 | -0.320 | 0.267 | 0.414 | 0.288 | -1.109 | CDS  | GI:188594601 | BAG33576.1 |
| AP009380 | PGN_1058  | putative bacterioferritin comigratory protein                          |        | 1177996 | 1178451 | 456  | reverse | 0.826 | -0.276 | 0.261 | 0.407 | 0.246 | -1.124 | CDS  | GI:188594602 | BAG33577.1 |
| AP009380 | PGN_1059  | conserved hypothetical protein                                         | bcp    | 1178752 | 1179021 | 270  | forward | 1.084 | 0.116  | 0.728 | 0.811 | 0.335 | 0.348  | CDS  | GI:188594603 | BAG33578.1 |
| AP009380 | PGN_1060  | transposase in ISPg3                                                   |        | 1179008 | 1179910 | 903  | reverse | 0.668 | -0.582 | 0.119 | 0.239 | 0.374 | -1.557 | CDS  | GI:188594604 | BAG33579.1 |
| AP009380 | PGN_1061  | conserved hypothetical protein                                         |        | 1180396 | 1181307 | 912  | forward | 0.979 | -0.031 | 0.896 | 0.936 | 0.237 | -0.131 | CDS  | GI:188594605 | BAG33580.1 |
| AP009380 | PGN_1062  | tRNA modification GTPase                                               |        | 1181339 | 1182895 | 1557 | forward | 1.372 | 0.457  | 0.021 | 0.072 | 0.198 | 2.307  | CDS  | GI:188594606 | BAG33581.1 |
| AP009380 | PGN_1063  | partial transposase Orf2 in ISPg5                                      |        | 1183205 | 1183396 | 192  | reverse | 1.216 | 0.282  | 0.415 | 0.553 | 0.346 | 0.815  | CDS  | GI:188594607 | BAG33582.1 |
| AP009380 | PGN_1064  | transposase in ISPg3                                                   |        | 1183610 | 1184512 | 903  | reverse | 0.656 | -0.607 | 0.072 | 0.165 | 0.337 | -1.802 | CDS  | GI:188594608 | BAG33583.1 |
| AP009380 | PGN_1065  | transposase in ISPg3                                                   |        | 1184666 | 1185568 | 903  | reverse | 0.758 | -0.400 | 0.267 | 0.413 | 0.360 | -1.111 | CDS  | GI:188594609 | BAG33584.1 |
| AP009380 | PGN_1066  | transposase in ISPg3                                                   |        | 1185976 | 1186878 | 903  | forward | 0.698 | -0.518 | 0.095 | 0.205 | 0.310 | -1.670 | CDS  | GI:188594610 | BAG33585.1 |
| AP009380 | PGN_1067  | hypothetical protein                                                   |        | 1186924 | 1188018 | 1095 | reverse | 0.762 | -0.393 | 0.044 | 0.119 | 0.195 | -2.012 | CDS  | GI:188594611 | BAG33586.1 |
| AP009380 | PGN_1068  | conserved hypothetical protein                                         |        | 1188515 | 1189525 | 1011 | reverse | 0.600 | -0.736 |       |       |       |        |      |              |            |

|          |           |                                                                                  |         |         |      |         |       |        |       |       |       |        |      |              |            |
|----------|-----------|----------------------------------------------------------------------------------|---------|---------|------|---------|-------|--------|-------|-------|-------|--------|------|--------------|------------|
| AP009380 | PGN_1093  | conserved hypothetical protein                                                   | 1217354 | 1218685 | 1332 | reverse | 0.500 | -1.001 | 0.000 | 0.000 | 0.187 | -5.340 | CDS  | GI:188594637 | BAG33612.1 |
| AP009380 | PGN_1094  | glycine dehydrogenase                                                            | 1218891 | 1221758 | 2868 | reverse | 1.461 | 0.547  | 0.021 | 0.072 | 0.238 | 2.301  | CDS  | GI:188594638 | BAG33613.1 |
| AP009380 | PGN_1095  | probable metallo-beta-lactamase                                                  | 1221762 | 1222406 | 645  | reverse | 1.088 | 0.122  | 0.575 | 0.695 | 0.217 | 0.561  | CDS  | GI:188594639 | BAG33614.1 |
| AP009380 | PGN_1096  | glucose-inhibited division protein B                                             | 1222403 | 1223077 | 675  | reverse | 0.873 | -0.195 | 0.454 | 0.546 | 0.261 | -0.749 | CDS  | GI:188594640 | BAG33615.1 |
| AP009380 | PGN_1097  | conserved hypothetical protein                                                   | 1223103 | 1223915 | 813  | reverse | 0.869 | -0.202 | 0.501 | 0.635 | 0.301 | -0.673 | CDS  | GI:188594641 | BAG33616.1 |
| AP009380 | PGN_1098  | probable succinylcysteine biosynthesis regulator ExsB protein                    | 1224353 | 1225015 | 663  | forward | 1.418 | 0.504  | 0.084 | 0.188 | 0.292 | 1.729  | CDS  | GI:188594642 | BAG33617.1 |
| AP009380 | PGN_1099  | probable phosphoesterase                                                         | 1225050 | 1225544 | 495  | forward | 1.312 | 0.391  | 0.197 | 0.336 | 0.304 | 1.289  | CDS  | GI:188594643 | BAG33618.1 |
| AP009380 | PGN_1100  | putative capsule biosynthesis protein CapA                                       | 1225555 | 1226685 | 1131 | forward | 1.469 | 0.554  | 0.096 | 0.207 | 0.333 | 1.665  | CDS  | GI:188594644 | BAG33619.1 |
| AP009380 | PGN_1101  | conserved hypothetical protein                                                   | 1226727 | 1226906 | 180  | reverse | 1.876 | 0.908  | 0.015 | 0.057 | 0.373 | 2.436  | CDS  | GI:188594645 | BAG33620.1 |
| AP009380 | PGN_1102  | hypothetical protein                                                             | 1227469 | 1227561 | 93   | reverse | 0.431 | -1.213 | 0.009 | 0.040 | 0.463 | -2.621 | CDS  | GI:188594646 | BAG33621.1 |
| AP009380 | PGN_1103  | dipeptidase                                                                      | 1227855 | 1229513 | 1659 | forward | 1.334 | 0.415  | 0.235 | 0.379 | 0.350 | 1.187  | CDS  | GI:188594647 | BAG33622.1 |
| AP009380 | PGN_10028 | tRNA-Arg                                                                         | 1229586 | 1229660 | 75   | forward | 0.583 | -0.778 | 0.042 | 0.114 | 0.382 | -2.036 | tRNA |              |            |
| AP009380 | PGN_1104  | chorismate synthase                                                              | 1229886 | 1230992 | 1107 | reverse | 0.595 | -0.748 | 0.052 | 0.131 | 0.385 | -1.946 | CDS  | GI:188594648 | BAG33623.1 |
| AP009380 | PGN_1105  | probable FKBP-type peptidyl-prolyl ds-trans isomerase                            | 1231142 | 1231714 | 573  | reverse | 0.541 | -0.885 | 0.035 | 0.101 | 0.420 | -2.109 | CDS  | GI:188594649 | BAG33624.1 |
| AP009380 | PGN_1106  | conserved hypothetical protein                                                   | 1231765 | 1232271 | 507  | reverse | 0.589 | -0.763 | 0.039 | 0.109 | 0.370 | -2.062 | CDS  | GI:188594650 | BAG33625.1 |
| AP009380 | PGN_1107  | conserved hypothetical protein                                                   | 1232268 | 1232678 | 411  | reverse | 0.761 | -0.394 | 0.281 | 0.429 | 0.365 | -1.079 | CDS  | GI:188594651 | BAG33626.1 |
| AP009380 | PGN_1108  | putative RNA polymerase ECF-type sigma factor                                    | 1232726 | 1233277 | 552  | reverse | 0.544 | -0.879 | 0.002 | 0.015 | 0.286 | -3.069 | CDS  | GI:188594652 | BAG33627.1 |
| AP009380 | PGN_1109  | hypothetical protein                                                             | 1233914 | 1234141 | 228  | forward | 0.918 | -0.123 | 0.643 | 0.750 | 0.266 | -0.463 | CDS  | GI:188594653 | BAG33628.1 |
| AP009380 | PGN_1110  | partial transposase in ISPg1                                                     | 1234332 | 1234967 | 636  | forward | 0.729 | -0.456 | 0.337 | 0.487 | 0.475 | -0.960 | CDS  | GI:188594654 | BAG33629.1 |
| AP009380 | PGN_1111  | formate-tetrahydrofolate ligase                                                  | 1235184 | 1236851 | 1668 | reverse | 1.257 | 0.330  | 0.223 | 0.366 | 0.271 | 1.219  | CDS  | GI:188594655 | BAG33630.1 |
| AP009380 | PGN_1112  | PhoH-like protein                                                                | 1237008 | 1238342 | 1335 | forward | 1.086 | 0.119  | 0.562 | 0.685 | 0.206 | 0.579  | CDS  | GI:188594656 | BAG33631.1 |
| AP009380 | PGN_1113  | putative crossover junction endodeoxyribonuclease RuvC                           | 1238390 | 1238959 | 570  | reverse | 0.816 | -0.294 | 0.170 | 0.303 | 0.214 | -1.372 | CDS  | GI:188594657 | BAG33632.1 |
| AP009380 | PGN_1114  | conserved hypothetical protein                                                   | 1238967 | 1239275 | 309  | reverse | 0.913 | -0.132 | 0.603 | 0.717 | 0.254 | -0.520 | CDS  | GI:188594658 | BAG33633.1 |
| AP009380 | PGN_1115  | putative hemagglutinin                                                           | 1239496 | 1240605 | 1110 | forward | 0.535 | -0.902 | 0.035 | 0.102 | 0.429 | -2.103 | CDS  | GI:188594659 | BAG33634.1 |
| AP009380 | PGN_1116  | putative aminotransferase                                                        | 1240734 | 1242044 | 1311 | reverse | 1.772 | 0.825  | 0.008 | 0.036 | 0.310 | 2.662  | CDS  | GI:188594660 | BAG33635.1 |
| AP009380 | PGN_1117  | acetyl-CoA synthetase                                                            | 1242087 | 1244144 | 2058 | reverse | 1.766 | 0.820  | 0.012 | 0.048 | 0.326 | 2.516  | CDS  | GI:188594661 | BAG33636.1 |
| AP009380 | PGN_1118  | transposase in ISPg1                                                             | 1244914 | 1245999 | 1086 | forward | 0.928 | -0.108 | 0.811 | 0.874 | 0.451 | -0.240 | CDS  | GI:188594662 | BAG33637.1 |
| AP009380 | PGN_1119  | probable large conductance mechanosensitive channel protein                      | 1246529 | 1246948 | 420  | forward | 1.069 | 0.097  | 0.692 | 0.788 | 0.245 | 0.396  | CDS  | GI:188594663 | BAG33638.1 |
| AP009380 | PGN_1120  | putative NADPH-NAD transhydrogenase                                              | 1247326 | 1248483 | 1158 | forward | 1.631 | 0.706  | 0.036 | 0.103 | 0.337 | 2.096  | CDS  | GI:188594664 | BAG33639.1 |
| AP009380 | PGN_1121  | probable NADPH-NAD transhydrogenase alpha subunit                                | 1248593 | 1248907 | 315  | forward | 1.727 | 0.788  | 0.019 | 0.068 | 0.337 | 2.340  | CDS  | GI:188594665 | BAG33640.1 |
| AP009380 | PGN_1122  | NADPH-NAD transhydrogenase beta subunit                                          | 1248904 | 1251441 | 2538 | forward | 1.909 | 0.932  | 0.003 | 0.018 | 0.314 | 2.968  | CDS  | GI:188594666 | BAG33641.1 |
| AP009380 | PGN_1123  | conserved hypothetical protein                                                   | 1251587 | 1252786 | 1200 | reverse | 1.598 | 0.676  | 0.006 | 0.030 | 0.246 | 2.749  | CDS  | GI:188594667 | BAG33642.1 |
| AP009380 | PGN_1124  | Band 7 protein                                                                   | 1252783 | 1253763 | 981  | reverse | 1.120 | 0.163  | 0.529 | 0.656 | 0.259 | 0.630  | CDS  | GI:188594668 | BAG33643.1 |
| AP009380 | PGN_1125  | conserved hypothetical protein                                                   | 1253790 | 1254254 | 465  | reverse | 0.985 | -0.022 | 0.936 | 0.956 | 0.273 | -0.080 | CDS  | GI:188594669 | BAG33644.1 |
| AP009380 | PGN_1126  | putative error-prone repair: SOS-response transcriptional repressor UmuD homolog | 1255263 | 1255688 | 426  | forward | 0.882 | -0.181 | 0.396 | 0.537 | 0.213 | -0.849 | CDS  | GI:188594670 | BAG33645.1 |
| AP009380 | PGN_1127  | putative SOS mutagenesis and repair protein UmuC homolog                         | 1255696 | 1257057 | 1362 | forward | 1.002 | 0.002  | 0.990 | 0.991 | 0.179 | 0.013  | CDS  | GI:188594671 | BAG33646.1 |
| AP009380 | PGN_1128  | L-lactate permease                                                               | 1257066 | 1258616 | 1551 | reverse | 1.054 | 0.076  | 0.668 | 0.767 | 0.178 | 0.429  | CDS  | GI:188594672 | BAG33647.1 |
| AP009380 | PGN_1129  | conserved hypothetical protein                                                   | 1258932 | 1259402 | 471  | forward | 0.554 | -0.853 | 0.009 | 0.041 | 0.328 | -2.602 | CDS  | GI:188594673 | BAG33648.1 |
| AP009380 | PGN_1130  | putative UDP-N-acetylenolpyruvylglucosamine reductase                            | 1259402 | 1260418 | 1017 | forward | 0.603 | -0.729 | 0.010 | 0.043 | 0.283 | -2.575 | CDS  | GI:188594674 | BAG33649.1 |
| AP009380 | PGN_1131  | conserved hypothetical protein                                                   | 1260445 | 1261923 | 1479 | forward | 0.560 | -0.836 | 0.037 | 0.105 | 0.401 | -2.083 | CDS  | GI:188594675 | BAG33650.1 |
| AP009380 | PGN_1132  | transposase in ISPg1                                                             | 1262252 | 1263337 | 1086 | reverse | 0.669 | -0.581 | 0.222 | 0.366 | 0.476 | -1.220 | CDS  | GI:188594676 | BAG33651.1 |
| AP009380 | PGN_1133  | hypothetical protein                                                             | 1263359 | 1263559 | 201  | reverse | 0.331 | -1.596 | 0.004 | 0.021 | 0.548 | -2.911 | CDS  | GI:188594677 | BAG33652.1 |
| AP009380 | PGN_1134  | conserved hypothetical protein                                                   | 1263752 | 1264873 | 1122 | forward | 1.143 | 0.193  | 0.435 | 0.574 | 0.248 | 0.780  | CDS  | GI:188594678 | BAG33653.1 |
| AP009380 | PGN_1135  | putative glycosyltransferase                                                     | 1264870 | 1266141 | 1272 | forward | 1.175 | 0.233  | 0.370 | 0.514 | 0.259 | 0.896  | CDS  | GI:188594679 | BAG33654.1 |
| AP009380 | PGN_1136  | probable GTP-cyclidohydrolase protein                                            | 1266278 | 1266742 | 465  | forward | 0.955 | -0.066 | 0.755 | 0.831 | 0.212 | -0.312 | CDS  | GI:188594680 | BAG33655.1 |
| AP009380 | PGN_1137  | conserved hypothetical protein                                                   | 1266770 | 1267651 | 882  | forward | 1.096 | 0.133  | 0.573 | 0.693 | 0.235 | 0.563  | CDS  | GI:188594681 | BAG33656.1 |
| AP009380 | PGN_1138  | conserved hypothetical protein                                                   | 1268039 | 1268527 | 489  | reverse | 1.158 | 0.212  | 0.366 | 0.510 | 0.234 | 0.904  | CDS  | GI:188594682 | BAG33657.1 |
| AP009380 | PGN_1139  | conserved hypothetical protein                                                   | 1268538 | 1268951 | 414  | reverse | 1.324 | 0.405  | 0.104 | 0.218 | 0.250 | 1.624  | CDS  | GI:188594683 | BAG33658.1 |
| AP009380 | PGN_1140  | putative orotate phosphoribosyltransferase                                       | 1269002 | 1269634 | 633  | reverse | 1.551 | 0.633  | 0.018 | 0.065 | 0.268 | 2.359  | CDS  | GI:188594684 | BAG33659.1 |
| AP009380 | PGN_1141  | putative amidohydrolase                                                          | 1269745 | 1270566 | 822  | reverse | 1.180 | 0.239  | 0.387 | 0.530 | 0.276 | 0.865  | CDS  | GI:188594685 | BAG33660.1 |
| AP009380 | PGN_1142  | probable acetyltransferase                                                       | 1270563 | 1271111 | 549  | reverse | 0.984 | -0.024 | 0.935 | 0.956 | 0.293 | -0.081 | CDS  | GI:188594686 | BAG33661.1 |
| AP009380 | PGN_1143  | conserved hypothetical protein                                                   | 1271162 | 1271587 | 426  | reverse | 0.736 | -0.442 | 0.246 | 0.391 | 0.381 | -1.159 | CDS  | GI:188594687 | BAG33662.1 |
| AP009380 | PGN_1144  | hypothetical protein                                                             | 1271814 | 1271957 | 144  | reverse | 0.578 | -0.792 | 0.015 | 0.056 | 0.324 | -2.443 | CDS  | GI:188594688 | BAG33663.1 |
| AP009380 | PGN_1145  | conserved hypothetical protein                                                   | 1272128 | 1272259 | 132  | reverse | 0.768 | -0.381 | 0.117 | 0.236 | 0.243 | -1.566 | CDS  | GI:188594689 | BAG33664.1 |
| AP009380 | PGN_1146  | conserved hypothetical protein                                                   | 1272454 | 1273134 | 681  | reverse | 0.956 | -0.065 | 0.722 | 0.809 | 0.184 | -0.356 | CDS  | GI:188594690 | BAG33665.1 |
| AP009380 | PGN_1147  | conserved hypothetical protein                                                   | 1273445 | 1274416 | 972  | reverse | 0.696 | -0.524 | 0.019 | 0.066 | 0.223 | -2.352 | CDS  | GI:188594691 | BAG33666.1 |
| AP009380 | PGN_1148  | phosphoribosylamine-glycine ligase                                               | 1274419 | 1275714 | 1296 | reverse | 0.725 | -0.464 | 0.076 | 0.174 | 0.262 | -1.771 | CDS  | GI:188594692 | BAG33667.1 |
| AP009380 | PGN_1149  | prolyl tripeptidase A                                                            | 1275711 | 1277909 | 2199 | reverse | 0.769 | -0.378 | 0.122 | 0.242 | 0.245 | -1.547 | CDS  | GI:188594693 | BAG33668.1 |
| AP009380 | PGN_1150  | putative N6-adenine-specific DNA methylase                                       | 1277941 | 1279395 | 1455 | reverse | 0.786 | -0.348 | 0.244 | 0.389 | 0.299 | -1.166 | CDS  | GI:188594694 | BAG33669.1 |
| AP009380 | PGN_1151  | 1-deoxy-D-xylulose-5-phosphate reductoisomerase                                  | 1280014 | 1281171 | 1158 | reverse | 1.382 | 0.467  | 0.103 | 0.216 | 0.286 | 1.632  | CDS  | GI:188594695 | BAG33670.1 |
| AP009380 | PGN_1152  | probable 16S rRNA processing protein                                             | 1281168 | 1281695 | 528  | reverse | 0.941 | -0.088 | 0.641 | 0.749 | 0.188 | -0.466 | CDS  | GI:188594696 | BAG33671.1 |
| AP009380 | PGN_1153  | UDP-N-acetylglucosamine 1-carboxyvinyltransferase                                | 1281702 | 1283006 | 1305 | reverse | 1.039 | 0.056  | 0.780 | 0.853 | 0.200 | 0.279  | CDS  | GI:188594697 | BAG33672.1 |
| AP009380 | PGN_1154  | conserved hypothetical protein                                                   | 1283037 | 1283621 | 585  | reverse | 0.965 | -0.052 | 0.798 | 0.865 | 0.203 | -0.257 | CDS  | GI:188594698 | BAG33673.1 |
| AP009380 | PGN_1155  | glucose-6-phosphate isomerase                                                    | 1283659 | 1284996 | 1338 | reverse | 0.860 | -0.218 | 0.339 | 0.489 | 0.228 | -0.956 | CDS  | GI:188594699 |            |

|          |           |                                                                                           |      |         |         |              |       |        |       |       |         |        |      |              |            |
|----------|-----------|-------------------------------------------------------------------------------------------|------|---------|---------|--------------|-------|--------|-------|-------|---------|--------|------|--------------|------------|
| AP009380 | PGN_1179  | phosphotransacetylase                                                                     |      | 1311044 | 1312054 | 1011 reverse | 2.110 | 1.077  | 0.000 | 0.000 | 0.208   | 5.178  | CDS  | GI:188594723 | BAG33698.1 |
| AP009380 | PGN_1180  | conserved hypothetical protein                                                            |      | 1312263 | 1313111 | 849 reverse  | 1.663 | 0.734  | 0.000 | 0.001 | 0.186   | 3.946  | CDS  | GI:188594724 | BAG33699.1 |
| AP009380 | PGN_1181  | probable thiol:disulfide oxidoreductase                                                   |      | 1313252 | 1314355 | 1104 reverse | 2.204 | 1.140  | 0.000 | 0.001 | 0.282   | 4.041  | CDS  | GI:188594725 | BAG33700.1 |
| AP009380 | PGN_1182  | conserved hypothetical protein                                                            |      | 1314623 | 1314871 | 249 forward  | 0.665 | -0.588 | 0.057 | 0.140 | 0.308   | -1.907 | CDS  | GI:188594726 | BAG33701.1 |
| AP009380 | PGN_1183  | hypothetical protein                                                                      |      | 1315054 | 1315197 | 144 forward  | 0.875 | -0.193 | 0.503 | 0.636 | 0.288   | -0.670 | CDS  | GI:188594727 | BAG33702.1 |
| AP009380 | PGN_1184  | conserved hypothetical protein                                                            |      | 1315228 | 1316160 | 933 forward  | 1.803 | 0.850  | 0.000 | 0.004 | 0.238   | 3.565  | CDS  | GI:188594728 | BAG33703.1 |
| AP009380 | PGN_1185  | conserved hypothetical protein                                                            |      | 1316212 | 1316775 | 564 reverse  | 2.616 | 1.387  | 0.000 | 0.000 | 0.201   | 6.906  | CDS  | GI:188594729 | BAG33704.1 |
| AP009380 | PGN_1186  | putative DNA-binding response regulator RprY                                              | rprY | 1316892 | 1317629 | 738 reverse  | 1.440 | 0.526  | 0.016 | 0.061 | 0.219   | 2.399  | CDS  | GI:188594730 | BAG33705.1 |
| AP009380 | PGN_1187  | conserved hypothetical protein                                                            |      | 1318389 | 1319432 | 1044 forward | 2.905 | 1.539  | 0.000 | 0.000 | 0.239   | 6.449  | CDS  | GI:188594731 | BAG33706.1 |
| AP009380 | PGN_1188  | conserved hypothetical protein                                                            |      | 1319510 | 1320121 | 612 forward  | 2.852 | 1.512  | 0.000 | 0.000 | 0.207   | 7.309  | CDS  | GI:188594732 | BAG33707.1 |
| AP009380 | PGN_1189  | phosphoglucomutase/phosphomannomutase                                                     |      | 1320175 | 1321563 | 1389 forward | 3.041 | 1.604  | 0.000 | 0.000 | 0.292   | 5.494  | CDS  | GI:188594733 | BAG33708.1 |
| AP009380 | PGN_1190  | RNA methyltransferase                                                                     |      | 1321608 | 1323044 | 1437 forward | 2.626 | 1.393  | 0.000 | 0.000 | 0.296   | 4.701  | CDS  | GI:188594734 | BAG33709.1 |
| AP009380 | PGN_1191  | transposase in ISPg1                                                                      |      | 1323484 | 1324569 | 1086 reverse | 0.710 | -0.493 | 0.270 | 0.417 | 0.447   | -1.102 | CDS  | GI:188594735 | BAG33710.1 |
| AP009380 | PGN_1192  | DNA-binding protein histone-like family                                                   |      | 1324680 | 1325165 | 486 forward  | 0.407 | -1.296 | 0.000 | 0.001 | 0.334   | -3.884 | CDS  | GI:188594736 | BAG33711.1 |
| AP009380 | PGN_1193  | conserved hypothetical protein                                                            |      | 1325303 | 1326409 | 1107 forward | 1.215 | 0.282  | 0.351 | 0.498 | 0.302   | 0.932  | CDS  | GI:188594737 | BAG33712.1 |
| AP009380 | PGN_1194  | alanine racemase                                                                          |      | 1326445 | 1328916 | 2472 forward | 1.731 | 0.791  | 0.019 | 0.066 | 0.336   | 2.353  | CDS  | GI:188594738 | BAG33713.1 |
| AP009380 | PGN_1195  | conserved hypothetical protein                                                            |      | 1329224 | 1330447 | 1224 reverse | 0.850 | -0.234 | 0.276 | 0.424 | 0.215   | -1.089 | CDS  | GI:188594739 | BAG33714.1 |
| AP009380 | PGN_10029 | tRNA-Arg                                                                                  |      | 1330508 | 1330581 | 74 reverse   | 0.418 | -1.258 | 0.019 | 0.066 | 0.535   | -2.351 | tRNA |              |            |
| AP009380 | PGN_10030 | tRNA-Arg                                                                                  |      | 1330617 | 1330690 | 74 reverse   | 1.134 | 0.182  | 0.737 | 0.818 | 0.540   | 0.336  | tRNA |              |            |
| AP009380 | PGN_1196  | putative sugar phosphate isomerase                                                        |      | 1330785 | 1331609 | 825 reverse  | 1.584 | 0.663  | 0.026 | 0.083 | 0.298   | 2.222  | CDS  | GI:188594740 | BAG33715.1 |
| AP009380 | PGN_1197  | conserved hypothetical protein                                                            |      | 1331602 | 1332453 | 852 reverse  | 1.288 | 0.365  | 0.138 | 0.261 | 0.246   | 1.485  | CDS  | GI:188594741 | BAG33716.1 |
| AP009380 | PGN_1198  | putative sodium-solute transporter                                                        |      | 1332450 | 1333910 | 1461 reverse | 0.985 | -0.022 | 0.921 | 0.951 | 0.218   | -0.099 | CDS  | GI:188594742 | BAG33717.1 |
| AP009380 | PGN_1199  | DNA-binding protein histone-like family                                                   |      | 1334281 | 1334739 | 459 forward  | 1.796 | 0.845  | 0.003 | 0.017 | 0.280   | 3.018  | CDS  | GI:188594743 | BAG33718.1 |
| AP009380 | PGN_1200  | ATPase AAA family                                                                         |      | 1334283 | 1336127 | 1305 forward | 1.196 | 0.258  | 0.224 | 0.366 | 0.212   | 1.216  | CDS  | GI:188594744 | BAG33719.1 |
| AP009380 | PGN_1201  | conserved hypothetical protein                                                            |      | 1336210 | 1336920 | 711 forward  | 1.093 | 0.128  | 0.602 | 0.716 | 0.245   | 0.522  | CDS  | GI:188594745 | BAG33720.1 |
| AP009380 | PGN_1202  | RNA polymerase sigma-54 factor                                                            | rpoN | 1336884 | 1338341 | 1458 reverse | 1.375 | 0.459  | 0.047 | 0.123 | 0.231   | 1.985  | CDS  | GI:188594746 | BAG33721.1 |
| AP009380 | PGN_1203  | UDP-N-acetylmuramoylalanyl-D-glutamyl-2, 6-diaminopimelate-D-alanyl-D-alanyl ligase       |      | 1338335 | 1339639 | 1305 reverse | 0.974 | -0.038 | 0.858 | 0.909 | 0.209   | -0.179 | CDS  | GI:188594747 | BAG33722.1 |
| AP009380 | PGN_1204  | probable aspartate-1-decarboxylase                                                        |      | 1339841 | 1340197 | 357 forward  | 0.936 | -0.095 | 0.741 | 0.821 | 0.288   | -0.330 | CDS  | GI:188594748 | BAG33723.1 |
| AP009380 | PGN_1205  | signal recognition particle protein                                                       |      | 1340274 | 1341611 | 1338 forward | 1.468 | 0.554  | 0.031 | 0.093 | 0.256   | 2.161  | CDS  | GI:188594749 | BAG33724.1 |
| AP009380 | PGN_1206  | putative methylenetetrahydrofolate dehydrogenase/methylenetetrahydrofolate cyclohydrolase |      | 1341732 | 1342622 | 891 forward  | 0.864 | -0.210 | 0.284 | 0.432 | 0.196   | -1.071 | CDS  | GI:188594750 | BAG33725.1 |
| AP009380 | PGN_1207  | putative transport multidrug efflux protein                                               |      | 1342915 | 1344261 | 1347 forward | 0.940 | -0.089 | 0.748 | 0.825 | 0.275   | -0.322 | CDS  | GI:188594751 | BAG33726.1 |
| AP009380 | PGN_1208  | CipB protein                                                                              | dpB  | 1344903 | 1347494 | 2592 reverse | 0.366 | -1.451 | 0.002 | 0.014 | 0.471   | -3.800 | CDS  | GI:188594752 | BAG33727.1 |
| AP009380 | PGN_1209  | probable flavodoxin                                                                       |      | 1347713 | 1348273 | 561 forward  | 0.987 | -0.019 | 0.946 | 0.962 | 0.280   | -0.068 | CDS  | GI:188594753 | BAG33728.1 |
| AP009380 | PGN_1210  | hypothetical protein                                                                      |      | 1349272 | 1350174 | 903 forward  | 0.681 | -0.553 | 0.018 | 0.064 | 0.234   | -2.370 | CDS  | GI:188594754 | BAG33729.1 |
| AP009380 | PGN_1211  | hypothetical protein                                                                      |      | 1350327 | 1351196 | 870 forward  | 1.091 | 0.126  | 0.608 | 0.722 | 0.246   | 0.513  | CDS  | GI:188594755 | BAG33730.1 |
| AP009380 | PGN_1212  | hypothetical protein                                                                      |      | 1351214 | 1351858 | 645 forward  | 0.963 | -0.055 | 0.839 | 0.897 | 0.272   | -0.203 | CDS  | GI:188594756 | BAG33731.1 |
| AP009380 | PGN_1213  | putative ATP-binding protein                                                              |      | 1351855 | 1355046 | 3192 forward | 1.074 | 0.103  | 0.659 | 0.761 | 0.233   | 0.441  | CDS  | GI:188594757 | BAG33732.1 |
| AP009380 | PGN_1214  | hypothetical protein                                                                      |      | 1355050 | 1355760 | 711 forward  | 1.176 | 0.233  | 0.429 | 0.567 | 0.295   | 0.791  | CDS  | GI:188594758 | BAG33733.1 |
| AP009380 | PGN_1215  | hypothetical protein                                                                      |      | 1355767 | 1356297 | 531 forward  | 1.094 | 0.130  | 0.661 | 0.763 | 0.296   | 0.438  | CDS  | GI:188594759 | BAG33734.1 |
| AP009380 | PGN_1216  | transposase in ISPg1                                                                      |      | 1356488 | 1357573 | 1086 forward | 0.630 | -0.666 | 0.126 | 0.247 | 0.435   | -1.530 | CDS  | GI:188594760 | BAG33735.1 |
| AP009380 | PGN_1217  | hypothetical protein                                                                      |      | 1357785 | 1357895 | 111 forward  | 0.724 | -0.465 | 0.128 | 0.250 | 0.306   | -1.522 | CDS  | GI:188594761 | BAG33736.1 |
| AP009380 | PGN_1218  | asparaginyl-tRNA synthetase                                                               |      | 1357947 | 1359356 | 1410 reverse | 2.288 | 1.194  | 0.001 | 0.006 | 0.349   | 3.426  | CDS  | GI:188594762 | BAG33737.1 |
| AP009380 | PGN_1219  | ribosomal large subunit pseudouridine synthase B                                          |      | 1359388 | 1360707 | 1320 reverse | 1.970 | 0.978  | 0.003 | 0.018 | 0.328   | 2.979  | CDS  | GI:188594763 | BAG33738.1 |
| AP009380 | PGN_1220  | adenylosuccinate lyase                                                                    |      | 1360808 | 1362151 | 1344 reverse | 1.681 | 0.749  | 0.028 | 0.087 | 0.341   | 2.198  | CDS  | GI:188594764 | BAG33739.1 |
| AP009380 | PGN_1221  | probable ATP:corrinoid adenosyltransferase                                                |      | 1362286 | 1362849 | 564 reverse  | 0.769 | -0.380 | 0.093 | 0.202 | 0.226   | -1.681 | CDS  | GI:188594765 | BAG33740.1 |
| AP009380 | PGN_1222  | conserved hypothetical protein                                                            |      | 1362872 | 1363528 | 657 reverse  | 1.061 | 0.086  | 0.849 | 0.903 | 0.452   | 0.190  | CDS  | GI:188594766 | BAG33741.1 |
| AP009380 | PGN_1223  | uracil permease                                                                           |      | 1363547 | 1364734 | 1188 reverse | 0.526 | -0.927 | 0.016 | 0.060 | 0.385   | -2.407 | CDS  | GI:188594767 | BAG33742.1 |
| AP009380 | PGN_1224  | probable transcriptional regulator                                                        |      | 1365074 | 1365541 | 468 forward  | 1.170 | 0.227  | 0.248 | 0.393 | 0.196   | 1.156  | CDS  | GI:188594768 | BAG33743.1 |
| AP009380 | PGN_1225  | probable exodeoxyribonuclease VII large subunit                                           |      | 1365594 | 1366976 | 1383 forward | 1.630 | 0.705  | 0.034 | 0.099 | 0.332   | 2.125  | CDS  | GI:188594769 | BAG33744.1 |
| AP009380 | PGN_1226  | ribonucleotide reductase                                                                  |      | 1372429 | 1369801 | 2553 forward | 1.321 | 0.402  | 0.086 | 0.191 | 0.234   | 1.718  | CDS  | GI:188594770 | BAG33745.1 |
| AP009380 | PGN_1227  | TPR domain protein                                                                        |      | 1370001 | 1372175 | 2175 forward | 1.076 | 0.105  | 0.718 | 0.806 | 0.291   | 0.362  | CDS  | GI:188594771 | BAG33746.1 |
| AP009380 | PGN_1228  | hypothetical protein                                                                      |      | 1372442 | 1372552 | 111 forward  | 0.917 | -0.126 | 0.691 | 0.787 | 0.317   | -0.397 | CDS  | GI:188594772 | BAG33747.1 |
| AP009380 | PGN_1229  | valyl-tRNA synthetase                                                                     |      | 1372931 | 1375561 | 2631 forward | 1.740 | 0.799  | 0.016 | 0.061 | 0.333   | 2.400  | CDS  | GI:188594773 | BAG33748.1 |
| AP009380 | PGN_1230  | conserved hypothetical protein                                                            |      | 1375590 | 1376042 | 453 forward  | 1.847 | 0.885  | 0.011 | 0.047 | 0.350   | 5.259  | CDS  | GI:188594774 | BAG33749.1 |
| AP009380 | PGN_1231  | hypothetical protein                                                                      |      | 1376094 | 1376336 | 243 reverse  | 0.421 | -1.250 | 0.002 | 0.016 | 0.411   | -3.044 | CDS  | GI:188594775 | BAG33750.1 |
| AP009380 | PGN_10031 | tRNA-Thr                                                                                  |      | 1376103 | 1376175 | 73 forward   | 0.378 | -1.402 | 0.005 | 0.027 | 0.499   | -2.812 | tRNA |              |            |
| AP009380 | PGN_1232  | thioredoxin reductase                                                                     |      | 1376369 | 1377310 | 942 forward  | 1.090 | 0.124  | 0.489 | 0.626 | 0.180   | 0.691  | CDS  | GI:188594776 | BAG33751.1 |
| AP009380 | PGN_1233  | conserved hypothetical protein                                                            |      | 1377879 | 1378493 | 615 forward  | 0.967 | -0.049 | 0.868 | 0.917 | 0.295   | -0.167 | CDS  | GI:188594777 | BAG33752.1 |
| AP009380 | PGN_1234  | conserved hypothetical protein                                                            |      | 1378668 | 1380269 | 1602 reverse | 1.506 | 0.591  | 0.048 | 0.123 | 0.298   | 1.982  | CDS  | GI:188594778 | BAG33753.1 |
| AP009380 | PGN_1235  | membrane protein PorS                                                                     | porS | 1380259 | 1381566 | 1308 reverse | 0.849 | -0.237 | 0.350 | 0.498 | 0.253   | -0.934 | CDS  | GI:188594779 | BAG33754.1 |
| AP009380 | PGN_1236  | regulator PorR                                                                            | porR | 1381563 | 1382717 | 1155 reverse | 1.765 | 0.819  | 0.053 | 0.134 | 0.424   | 1.934  | CDS  | GI:188594780 | BAG33755.1 |
| AP009380 | PGN_1237  | hypothetical protein                                                                      |      | 1382872 | 1382964 | 93 forward   | 0.884 | -0.178 | 0.749 | 0.826 | 0.555   | -0.320 | CDS  | GI:188594781 | BAG33756.1 |
| AP009380 | PGN_1238  | conserved hypothetical protein                                                            |      | 1383104 | 1384240 | 1137 reverse | 1.625 | 0.700  | 0.050 | 0.128 | 0.357   | 1.959  | CDS  | GI:188594782 | BAG33757.1 |
| AP009380 | PGN_1239  | probable lipopolysaccharide biosynthesis glycosyltransferase                              |      | 1384351 | 1385211 | 861 reverse  | 1.843 | 0.882  | 0.025 | 0.081 | 0.394   | 2.237  | CDS  | GI:188594783 | BAG33758.1 |
| AP009380 | PGN_1240  | conserved hypothetical protein                                                            |      | 1385217 | 1386368 | 1152 reverse | 1.328 | 0.409  | 0.236 | 0.380 | 0.345</ |        |      |              |            |

|          |           |                                                                |      |         |         |      |         |       |        |       |       |       |         |      |              |            |
|----------|-----------|----------------------------------------------------------------|------|---------|---------|------|---------|-------|--------|-------|-------|-------|---------|------|--------------|------------|
| AP009380 | PGN_1263  | conserved hypothetical protein                                 |      | 1410847 | 1414254 | 3408 | reverse | 0.981 | -0.028 | 0.908 | 0.945 | 0.242 | -0.116  | CDS  | GI:188594807 | BAG33782.1 |
| AP009380 | PGN_1264  | conserved hypothetical protein                                 |      | 1414251 | 1414967 | 717  | reverse | 0.660 | -0.599 | 0.031 | 0.093 | 0.277 | -2.158  | CDS  | GI:188594808 | BAG33783.1 |
| AP009380 | PGN_1265  | hypothetical protein                                           |      | 1415080 | 1415286 | 207  | reverse | 0.723 | -0.467 | 0.402 | 0.543 | 0.558 | -0.837  | CDS  | GI:188594809 | BAG33784.1 |
| AP009380 | PGN_1266  | conserved hypothetical protein                                 |      | 1415796 | 1415924 | 129  | reverse | 1.123 | 0.168  | 0.600 | 0.715 | 0.319 | 0.525   | CDS  | GI:188594810 | BAG33785.1 |
| AP009380 | PGN_1267  | conserved hypothetical protein                                 |      | 1415956 | 1416828 | 873  | forward | 1.365 | 0.449  | 0.104 | 0.218 | 0.276 | 1.625   | CDS  | GI:188594811 | BAG33786.1 |
| AP009380 | PGN_1268  | putative oxidoreductase                                        |      | 1417068 | 1417889 | 822  | forward | 0.778 | -0.363 | 0.263 | 0.410 | 0.324 | -1.118  | CDS  | GI:188594812 | BAG33787.1 |
| AP009380 | PGN_1269  | putative electron transport protein                            |      | 1417886 | 1419253 | 1368 | forward | 0.981 | -0.028 | 0.933 | 0.955 | 0.328 | -0.084  | CDS  | GI:188594813 | BAG33788.1 |
| AP009380 | PGN_1270  | conserved hypothetical protein                                 |      | 1419259 | 1419843 | 585  | forward | 0.978 | -0.033 | 0.912 | 0.947 | 0.294 | -0.111  | CDS  | GI:188594814 | BAG33789.1 |
| AP009380 | PGN_1271  | probable thioesterase superfamily protein                      |      | 1419954 | 1420427 | 474  | reverse | 0.711 | -0.492 | 0.011 | 0.047 | 0.194 | -2.530  | CDS  | GI:188594815 | BAG33790.1 |
| AP009380 | PGN_1272  | putative diaminopimelate decarboxylase                         |      | 1420667 | 1421815 | 1149 | forward | 0.727 | -0.460 | 0.241 | 0.385 | 0.393 | -1.172  | CDS  | GI:188594816 | BAG33791.1 |
| AP009380 | PGN_1273  | probable 1,4-dihydroxy-2-naphthoate octaprenyltransferase      |      | 1421805 | 1422692 | 888  | forward | 0.737 | -0.441 | 0.080 | 0.181 | 0.252 | -1.749  | CDS  | GI:188594817 | BAG33792.1 |
| AP009380 | PGN_1274  | conserved hypothetical protein                                 |      | 1422784 | 1423164 | 381  | forward | 0.652 | -0.618 | 0.109 | 0.224 | 0.385 | -1.603  | CDS  | GI:188594818 | BAG33793.1 |
| AP009380 | PGN_1275  | conserved hypothetical protein                                 |      | 1423199 | 1424515 | 1317 | forward | 0.715 | -0.485 | 0.223 | 0.366 | 0.398 | -1.219  | CDS  | GI:188594819 | BAG33794.1 |
| AP009380 | PGN_1276  | transposase in ISPg1                                           |      | 1425416 | 1426501 | 1086 | reverse | 0.692 | -0.532 | 0.261 | 0.407 | 0.473 | -1.125  | CDS  | GI:188594820 | BAG33795.1 |
| AP009380 | PGN_1277  | conserved hypothetical protein                                 |      | 1426697 | 1426867 | 171  | forward | 0.864 | -0.211 | 0.693 | 0.788 | 0.535 | -0.395  | CDS  | GI:188594821 | BAG33796.1 |
| AP009380 | PGN_1278  | partial transposase in ISPg3                                   |      | 1427362 | 1428150 | 789  | forward | 0.559 | -0.839 | 0.031 | 0.094 | 0.390 | -2.152  | CDS  | GI:188594822 | BAG33797.1 |
| AP009380 | PGN_1279  | partial transposase in ISPg3                                   |      | 1428190 | 1428510 | 321  | forward | 0.786 | -0.347 | 0.391 | 0.532 | 0.404 | -0.859  | CDS  | GI:188594823 | BAG33798.1 |
| AP009380 | PGN_1280  | partial transposase in ISPg1                                   |      | 1428497 | 1428928 | 432  | reverse | 0.679 | -0.558 | 0.196 | 0.334 | 0.431 | -1.293  | CDS  | GI:188594824 | BAG33799.1 |
| AP009380 | PGN_1281  | putative conserved protein found in conjugate transposon TraM  | traM | 1429021 | 1430160 | 1140 | forward | 0.561 | -0.834 | 0.000 | 0.003 | 0.232 | -3.601  | CDS  | GI:188594825 | BAG33800.1 |
| AP009380 | PGN_1282  | conserved protein found in conjugate transposon TraN           | traN | 1430199 | 1431119 | 921  | forward | 0.636 | -0.652 | 0.019 | 0.068 | 0.279 | -2.336  | CDS  | GI:188594826 | BAG33801.1 |
| AP009380 | PGN_1283  | conserved protein found in conjugate transposon TraO           | traO | 1431151 | 1431705 | 555  | forward | 0.441 | -1.180 | 0.000 | 0.003 | 0.320 | -3.692  | CDS  | GI:188594827 | BAG33802.1 |
| AP009380 | PGN_1284  | putative DNA primase involved in conjugation TraP              | traP | 1431705 | 1432559 | 855  | forward | 0.533 | -0.908 | 0.000 | 0.001 | 0.233 | -3.906  | CDS  | GI:188594828 | BAG33803.1 |
| AP009380 | PGN_1285  | conserved protein found in conjugate transposon TraQ           | traQ | 1432584 | 1433045 | 462  | forward | 0.610 | -0.714 | 0.007 | 0.033 | 0.265 | -2.696  | CDS  | GI:188594829 | BAG33804.1 |
| AP009380 | PGN_1286  | probable lysozyme                                              |      | 1433029 | 1433544 | 516  | forward | 0.213 | -2.229 | 0.000 | 0.000 | 0.426 | -5.238  | CDS  | GI:188594830 | BAG33805.1 |
| AP009380 | PGN_1287  | conserved hypothetical protein                                 |      | 1433605 | 1434009 | 405  | reverse | 0.214 | -2.222 | 0.000 | 0.000 | 0.469 | -4.736  | CDS  | GI:188594831 | BAG33806.1 |
| AP009380 | PGN_1288  | conserved hypothetical protein                                 |      | 1434011 | 1435237 | 1227 | reverse | 0.276 | -1.857 | 0.000 | 0.001 | 0.478 | -3.885  | CDS  | GI:188594832 | BAG33807.1 |
| AP009380 | PGN_1289  | conserved hypothetical protein                                 |      | 1435495 | 1435725 | 231  | reverse | 0.576 | -0.797 | 0.049 | 0.126 | 0.404 | -1.971  | CDS  | GI:188594833 | BAG33808.1 |
| AP009380 | PGN_1290  | conserved hypothetical protein                                 |      | 1435730 | 1435984 | 255  | reverse | 0.667 | -0.585 | 0.150 | 0.278 | 0.406 | -1.441  | CDS  | GI:188594834 | BAG33809.1 |
| AP009380 | PGN_1291  | conserved hypothetical protein related to phage                |      | 1436011 | 1437285 | 1275 | reverse | 0.668 | -0.582 | 0.138 | 0.262 | 0.392 | -1.482  | CDS  | GI:188594835 | BAG33810.1 |
| AP009380 | PGN_1292  | probable anti-restriction protein                              |      | 1437302 | 1437832 | 531  | reverse | 0.612 | -0.710 | 0.130 | 0.253 | 0.469 | -1.512  | CDS  | GI:188594836 | BAG33811.1 |
| AP009380 | PGN_1293  | conserved hypothetical protein                                 |      | 1437854 | 1438270 | 417  | reverse | 0.457 | -1.129 | 0.002 | 0.014 | 0.365 | -3.096  | CDS  | GI:188594837 | BAG33812.1 |
| AP009380 | PGN_1294  | conserved hypothetical protein                                 |      | 1438283 | 1438501 | 219  | reverse | 0.499 | -1.003 | 0.020 | 0.068 | 0.429 | -2.335  | CDS  | GI:188594838 | BAG33813.1 |
| AP009380 | PGN_1295  | hypothetical protein                                           |      | 1438514 | 1438780 | 267  | reverse | 0.673 | -0.571 | 0.073 | 0.168 | 0.319 | -1.791  | CDS  | GI:188594839 | BAG33814.1 |
| AP009380 | PGN_1296  | putative OmpA family protein                                   |      | 1439480 | 1441498 | 2019 | reverse | 0.785 | -0.350 | 0.223 | 0.366 | 0.287 | -1.219  | CDS  | GI:188594840 | BAG33815.1 |
| AP009380 | PGN_1297  | conserved hypothetical protein                                 |      | 1441520 | 1442113 | 594  | reverse | 0.804 | -0.315 | 0.251 | 0.397 | 0.274 | -1.147  | CDS  | GI:188594841 | BAG33816.1 |
| AP009380 | PGN_1298  | conserved hypothetical protein                                 |      | 1442133 | 1442552 | 420  | reverse | 0.750 | -0.416 | 0.081 | 0.182 | 0.238 | -1.744  | CDS  | GI:188594842 | BAG33817.1 |
| AP009380 | PGN_1299  | hypothetical protein                                           |      | 1442549 | 1442665 | 117  | reverse | 0.627 | -0.673 | 0.093 | 0.203 | 0.401 | -1.678  | CDS  | GI:188594843 | BAG33818.1 |
| AP009380 | PGN_1300  | probable transcriptional regulator                             |      | 1442769 | 1443455 | 687  | reverse | 0.982 | -0.027 | 0.908 | 0.945 | 0.233 | -0.115  | CDS  | GI:188594844 | BAG33819.1 |
| AP009380 | PGN_1301  | probable transcriptional regulator                             |      | 1443472 | 1443828 | 357  | reverse | 1.045 | 0.063  | 0.825 | 0.885 | 0.287 | 0.221   | CDS  | GI:188594845 | BAG33820.1 |
| AP009380 | PGN_1302  | O-antigen ligase waaL                                          | waaL | 1443893 | 1445308 | 1416 | reverse | 1.842 | 0.881  | 0.005 | 0.025 | 0.310 | 2.840   | CDS  | GI:188594846 | BAG33821.1 |
| AP009380 | PGN_1303  | hypothetical protein                                           |      | 1445350 | 1446237 | 888  | reverse | 1.615 | 0.692  | 0.019 | 0.067 | 0.295 | 2.346   | CDS  | GI:188594847 | BAG33822.1 |
| AP009380 | PGN_1304  | conserved hypothetical protein                                 |      | 1446253 | 1447131 | 879  | reverse | 1.109 | 0.149  | 0.497 | 0.632 | 0.220 | 0.679   | CDS  | GI:188594848 | BAG33823.1 |
| AP009380 | PGN_1305  | putative N-acetylmuramoyl-L-alanine amidase                    |      | 1447172 | 1448362 | 1191 | reverse | 0.740 | -0.435 | 0.064 | 0.153 | 0.235 | -1.849  | CDS  | GI:188594849 | BAG33824.1 |
| AP009380 | PGN_10032 | tRNA-Thr                                                       |      | 1448555 | 1448631 | 77   | reverse | 0.411 | -1.283 | 0.001 | 0.010 | 0.400 | -3.205  | tRNA |              |            |
| AP009380 | PGN_1306  | hypothetical protein                                           |      | 1448901 | 1449152 | 252  | reverse | 0.587 | -0.767 | 0.017 | 0.061 | 0.320 | -2.394  | CDS  | GI:188594850 | BAG33825.1 |
| AP009380 | PGN_1307  | hypothetical protein                                           |      | 1449432 | 1449659 | 228  | reverse | 0.251 | -1.994 | 0.000 | 0.000 | 0.282 | -7.068  | CDS  | GI:188594851 | BAG33826.1 |
| AP009380 | PGN_1308  | probable iron dependent repressor                              |      | 1449706 | 1450638 | 933  | forward | 0.929 | -0.106 | 0.599 | 0.715 | 0.202 | -0.525  | CDS  | GI:188594852 | BAG33827.1 |
| AP009380 | PGN_1309  | ferric iron transport protein B                                |      | 1450675 | 1452849 | 2175 | forward | 0.609 | -0.717 | 0.011 | 0.045 | 0.281 | -2.551  | CDS  | GI:188594853 | BAG33828.1 |
| AP009380 | PGN_1310  | glycogen synthase                                              |      | 1452886 | 1454532 | 1647 | forward | 0.815 | -0.294 | 0.308 | 0.456 | 0.289 | -1.019  | CDS  | GI:188594854 | BAG33829.1 |
| AP009380 | PGN_1311  | putative K-dependent Na <sup>+</sup> exchanger related-protein |      | 1454601 | 1455554 | 954  | forward | 0.640 | -0.645 | 0.025 | 0.080 | 0.287 | -2.244  | CDS  | GI:188594855 | BAG33830.1 |
| AP009380 | PGN_1312  | probable transcriptional regulator                             |      | 1455575 | 1456039 | 465  | forward | 0.679 | -0.559 | 0.076 | 0.173 | 0.315 | -1.774  | CDS  | GI:188594856 | BAG33831.1 |
| AP009380 | PGN_1313  | conserved hypothetical protein                                 |      | 1456472 | 1458199 | 1728 | forward | 0.795 | -0.330 | 0.310 | 0.457 | 0.325 | -1.016  | CDS  | GI:188594857 | BAG33832.1 |
| AP009380 | PGN_1314  | ATP-dependent DNA helicase                                     |      | 1458433 | 1460730 | 2298 | reverse | 0.551 | -0.859 | 0.000 | 0.001 | 0.210 | -4.091  | CDS  | GI:188594858 | BAG33833.1 |
| AP009380 | PGN_1315  | conserved hypothetical protein                                 |      | 1460730 | 1462109 | 1380 | reverse | 0.513 | -0.964 | 0.014 | 0.055 | 0.393 | -2.453  | CDS  | GI:188594859 | BAG33834.1 |
| AP009380 | PGN_1316  | exonuclease ABC A subunit                                      | uvrA | 1462135 | 1465038 | 2904 | reverse | 0.479 | -1.063 | 0.000 | 0.003 | 0.289 | -3.674  | CDS  | GI:188594860 | BAG33835.1 |
| AP009380 | PGN_1317  | conserved hypothetical protein                                 |      | 1465109 | 1466599 | 1491 | reverse | 0.089 | -3.489 | 0.000 | 0.000 | 0.226 | -15.473 | CDS  | GI:188594861 | BAG33836.1 |
| AP009380 | PGN_1318  | putative ABC transporter ATP-binding protein                   |      | 1466577 | 1467311 | 735  | reverse | 0.059 | -4.085 | 0.000 | 0.000 | 0.214 | -19.127 | CDS  | GI:188594862 | BAG33837.1 |
| AP009380 | PGN_1319  | transposase in ISPg1                                           |      | 1467551 | 1468636 | 1086 | forward | 0.605 | -0.726 | 0.105 | 0.218 | 0.448 | -1.622  | CDS  | GI:188594863 | BAG33838.1 |
| AP009380 | PGN_1320  | conserved hypothetical protein                                 |      | 1468766 | 1469419 | 654  | reverse | 0.039 | -4.696 | 0.000 | 0.000 | 0.206 | -22.755 | CDS  | GI:188594864 | BAG33839.1 |
| AP009380 | PGN_1321  | conserved hypothetical protein                                 |      | 1469657 | 1470997 | 1341 | reverse | 0.763 | -0.389 | 0.403 | 0.544 | 0.466 | -0.836  | CDS  | GI:188594865 | BAG33840.1 |
| AP009380 | PGN_1322  | conserved hypothetical protein                                 |      | 1471140 | 1471316 | 177  | reverse | 0.738 | -0.438 | 0.064 | 0.153 | 0.237 | -1.852  | CDS  | GI:188594866 | BAG33841.1 |
| AP009380 | PGN_1323  | TPR domain protein                                             |      | 1471380 | 1473077 | 1698 | reverse | 1.828 | 0.871  | 0.008 | 0.036 | 0.328 | 2.658   | CDS  | GI:188594867 | BAG33842.1 |
| AP009380 | PGN_1324  | probable ABC transporter membrane protein                      |      | 1473255 | 1474157 | 903  | reverse | 1.750 | 0.808  | 0     |       |       |         |      |              |            |

|          |           |                                                                             |         |         |      |         |       |        |       |       |       |        |      |              |            |
|----------|-----------|-----------------------------------------------------------------------------|---------|---------|------|---------|-------|--------|-------|-------|-------|--------|------|--------------|------------|
| AP009380 | PGN_1349  | probable dipeptidyl aminopeptidase                                          | 1505647 | 1507926 | 2280 | forward | 1.577 | 0.657  | 0.034 | 0.100 | 0.310 | 2.117  | CDS  | GI:188594893 | BAG33868.1 |
| AP009380 | PGN_1350  | conserved hypothetical protein                                              | 1508085 | 1509077 | 993  | reverse | 0.901 | -0.151 | 0.530 | 0.656 | 0.240 | -0.628 | CDS  | GI:188594894 | BAG33869.1 |
| AP009380 | PGN_1351  | conserved hypothetical protein                                              | 1509152 | 1509436 | 285  | reverse | 0.840 | -0.252 | 0.304 | 0.452 | 0.245 | -1.027 | CDS  | GI:188594895 | BAG33870.1 |
| AP009380 | PGN_1352  | conserved hypothetical protein with DUF1706 domain                          | 1509570 | 1510106 | 537  | reverse | 0.893 | -0.163 | 0.514 | 0.645 | 0.250 | -0.653 | CDS  | GI:188594896 | BAG33871.1 |
| AP009380 | PGN_1353  | conserved hypothetical protein                                              | 1510110 | 1510526 | 417  | reverse | 0.833 | -0.263 | 0.357 | 0.502 | 0.286 | -0.921 | CDS  | GI:188594897 | BAG33872.1 |
| AP009380 | PGN_1354  | conserved hypothetical protein                                              | 1510702 | 1511634 | 933  | forward | 1.203 | 0.267  | 0.216 | 0.359 | 0.216 | 1.237  | CDS  | GI:188594898 | BAG33873.1 |
| AP009380 | PGN_1355  | conserved hypothetical protein                                              | 1511631 | 1511786 | 156  | forward | 1.524 | 0.607  | 0.012 | 0.049 | 0.242 | 2.506  | CDS  | GI:188594899 | BAG33874.1 |
| AP009380 | PGN_1356  | conserved hypothetical protein                                              | 1511776 | 1512108 | 333  | forward | 1.287 | 0.364  | 0.114 | 0.231 | 0.230 | 1.582  | CDS  | GI:188594900 | BAG33875.1 |
| AP009380 | PGN_1357  | conserved hypothetical protein                                              | 1512186 | 1512596 | 411  | forward | 1.096 | 0.133  | 0.634 | 0.743 | 0.279 | 0.476  | CDS  | GI:188594901 | BAG33876.1 |
| AP009380 | PGN_1358  | conserved hypothetical protein                                              | 1512872 | 1513183 | 312  | forward | 0.805 | -0.313 | 0.261 | 0.407 | 0.279 | -1.124 | CDS  | GI:188594902 | BAG33877.1 |
| AP009380 | PGN_1359  | putative erythronate-4-phosphate dehydrogenase                              | 1513187 | 1514320 | 1134 | forward | 0.947 | -0.079 | 0.740 | 0.821 | 0.238 | -0.332 | CDS  | GI:188594903 | BAG33878.1 |
| AP009380 | PGN_1360  | probable oxidoreductase                                                     | 1514330 | 1515055 | 726  | forward | 1.068 | 0.095  | 0.739 | 0.820 | 0.286 | 0.333  | CDS  | GI:188594904 | BAG33879.1 |
| AP009380 | PGN_1361  | conserved hypothetical protein                                              | 1515640 | 1515843 | 204  | forward | 0.573 | -0.804 | 0.010 | 0.043 | 0.312 | -2.574 | CDS  | GI:188594905 | BAG33880.1 |
| AP009380 | PGN_1362  | probable exported transglycosylase protein                                  | 1515974 | 1517539 | 1566 | forward | 1.052 | 0.073  | 0.743 | 0.823 | 0.221 | 0.328  | CDS  | GI:188594906 | BAG33881.1 |
| AP009380 | PGN_1363  | ABC transporter ATP-binding protein                                         | 1517564 | 1519435 | 1872 | forward | 1.802 | 0.849  | 0.000 | 0.003 | 0.233 | 3.647  | CDS  | GI:188594907 | BAG33882.1 |
| AP009380 | PGN_1364  | probable peptidyl-prolyl cis-trans isomerase cydophilin-type                | 1519443 | 1520147 | 705  | forward | 1.359 | 0.442  | 0.172 | 0.305 | 0.323 | 1.366  | CDS  | GI:188594908 | BAG33883.1 |
| AP009380 | PGN_1365  | conserved hypothetical protein                                              | 1520290 | 1520640 | 351  | reverse | 0.913 | -0.131 | 0.655 | 0.759 | 0.293 | -0.447 | CDS  | GI:188594909 | BAG33884.1 |
| AP009380 | PGN_1366  | conserved hypothetical protein                                              | 1520745 | 1522853 | 2109 | reverse | 0.966 | -0.049 | 0.829 | 0.888 | 0.229 | -0.215 | CDS  | GI:188594910 | BAG33885.1 |
| AP009380 | PGN_1367  | NAD-specific glutamate dehydrogenase                                        | 1523059 | 1524396 | 1338 | reverse | 1.509 | 0.594  | 0.046 | 0.122 | 0.298 | 1.992  | CDS  | GI:188594911 | BAG33886.1 |
| AP009380 | PGN_1368  | conserved hypothetical protein                                              | 1524720 | 1524830 | 111  | forward | 0.446 | -1.164 | 0.001 | 0.006 | 0.342 | -3.406 | CDS  | GI:188594912 | BAG33887.1 |
| AP009380 | PGN_1369  | conserved hypothetical protein                                              | 1524947 | 1525075 | 129  | forward | 1.059 | 0.083  | 0.853 | 0.905 | 0.448 | 0.185  | CDS  | GI:188594913 | BAG33888.1 |
| AP009380 | PGN_1370  | NAD-dependent nucleotide-diphosphate-sugar epimerase                        | 1525085 | 1526041 | 957  | reverse | 0.791 | -0.338 | 0.286 | 0.434 | 0.317 | -1.067 | CDS  | GI:188594914 | BAG33889.1 |
| AP009380 | PGN_1371  | hypothetical protein                                                        | 1526100 | 1526189 | 90   | forward | 0.275 | -1.862 | 0.000 | 0.000 | 0.442 | -4.213 | CDS  | GI:188594915 | BAG33890.1 |
| AP009380 | PGN_1372  | conserved hypothetical protein                                              | 1526357 | 1527067 | 711  | forward | 0.956 | -0.064 | 0.774 | 0.848 | 0.225 | -0.287 | CDS  | GI:188594916 | BAG33891.1 |
| AP009380 | PGN_1373  | probable transcriptional regulator                                          | 1527064 | 1527663 | 600  | forward | 1.116 | 0.159  | 0.433 | 0.571 | 0.202 | 0.784  | CDS  | GI:188594917 | BAG33892.1 |
| AP009380 | PGN_1374  | putative ribosomal large subunit pseudouridine synthase D                   | 1527681 | 1528364 | 684  | reverse | 0.912 | -0.133 | 0.467 | 0.606 | 0.183 | -0.728 | CDS  | GI:188594918 | BAG33893.1 |
| AP009380 | PGN_1375  | putative beta-ketoacyl-acyl carrier protein reductase                       | 1528408 | 1529154 | 747  | reverse | 0.919 | -0.122 | 0.625 | 0.735 | 0.249 | -0.489 | CDS  | GI:188594919 | BAG33894.1 |
| AP009380 | PGN_1376  | putative transcriptional regulator                                          | 1529238 | 1529873 | 636  | reverse | 0.768 | -0.381 | 0.184 | 0.320 | 0.287 | -1.328 | CDS  | GI:188594920 | BAG33895.1 |
| AP009380 | PGN_10033 | tRNA-Gln                                                                    | 1530097 | 1530170 | 74   | reverse | 0.362 | -1.468 | 0.000 | 0.003 | 0.399 | -3.675 | tRNA |              |            |
| AP009380 | PGN_1377  | GTP-binding protein LepA                                                    | 1530449 | 1532236 | 1788 | forward | 1.667 | 0.737  | 0.012 | 0.050 | 0.295 | 2.502  | CDS  | GI:188594921 | BAG33896.1 |
| AP009380 | PGN_1378  | replicative DNA helicase                                                    | 1532328 | 1533857 | 1530 | forward | 1.527 | 0.610  | 0.031 | 0.093 | 0.282 | 2.163  | CDS  | GI:188594922 | BAG33897.1 |
| AP009380 | PGN_1379  | hypothetical protein                                                        | 1534341 | 1534478 | 138  | forward | 0.435 | -1.199 | 0.000 | 0.002 | 0.310 | -3.865 | CDS  | GI:188594923 | BAG33898.1 |
| AP009380 | PGN_1380  | hypothetical protein                                                        | 1534517 | 1534639 | 123  | reverse | 0.458 | -1.127 | 0.003 | 0.018 | 0.379 | -2.971 | CDS  | GI:188594924 | BAG33899.1 |
| AP009380 | PGN_1381  | alanyl-tRNA synthetase                                                      | 1535303 | 1537933 | 2631 | forward | 1.204 | 0.268  | 0.224 | 0.366 | 0.221 | 1.215  | CDS  | GI:188594925 | BAG33900.1 |
| AP009380 | PGN_1382  | putative 3-dehydroquinase synthase                                          | 1538005 | 1539009 | 1005 | forward | 1.438 | 0.524  | 0.139 | 0.262 | 0.354 | 1.480  | CDS  | GI:188594926 | BAG33901.1 |
| AP009380 | PGN_10034 | tRNA-Pro                                                                    | 1539045 | 1539119 | 75   | forward | 0.604 | -0.727 | 0.032 | 0.096 | 0.340 | -2.141 | tRNA |              |            |
| AP009380 | PGN_1383  | conserved hypothetical protein                                              | 1539254 | 1539985 | 732  | reverse | 0.936 | -0.095 | 0.777 | 0.850 | 0.335 | -0.284 | CDS  | GI:188594927 | BAG33902.1 |
| AP009380 | PGN_1384  | probable 1-acyl-sn-glycerol-3-phosphate acetyltransferase                   | 1540000 | 1540785 | 786  | reverse | 0.551 | -0.860 | 0.002 | 0.014 | 0.277 | -3.101 | CDS  | GI:188594928 | BAG33903.1 |
| AP009380 | PGN_1385  | hypothetical protein                                                        | 1540791 | 1541057 | 267  | forward | 0.624 | -0.681 | 0.015 | 0.057 | 0.280 | -2.436 | CDS  | GI:188594929 | BAG33904.1 |
| AP009380 | PGN_1386  | conserved hypothetical protein                                              | 1541300 | 1541569 | 270  | forward | 1.045 | 0.063  | 0.860 | 0.910 | 0.357 | 0.177  | CDS  | GI:188594930 | BAG33905.1 |
| AP009380 | PGN_1387  | putative ABC transporter permease protein                                   | 1541838 | 1543073 | 1236 | reverse | 0.978 | -0.032 | 0.933 | 0.955 | 0.481 | -0.084 | CDS  | GI:188594931 | BAG33906.1 |
| AP009380 | PGN_1388  | DNA ligase                                                                  | 1543086 | 1545095 | 2010 | reverse | 1.277 | 0.353  | 0.363 | 0.507 | 0.388 | 0.910  | CDS  | GI:188594932 | BAG33907.1 |
| AP009380 | PGN_1389  | probable acetyltransferase                                                  | 1545083 | 1545610 | 528  | reverse | 1.229 | 0.297  | 0.428 | 0.566 | 0.375 | 0.792  | CDS  | GI:188594933 | BAG33908.1 |
| AP009380 | PGN_1390  | putative recombination protein RecR                                         | 1545617 | 1546240 | 624  | reverse | 1.070 | 0.098  | 0.790 | 0.859 | 0.366 | 0.267  | CDS  | GI:188594934 | BAG33909.1 |
| AP009380 | PGN_1391  | putative ribonuclease E                                                     | 1546237 | 1547796 | 1560 | reverse | 1.055 | 0.077  | 0.752 | 0.829 | 0.244 | 0.317  | CDS  | GI:188594935 | BAG33910.1 |
| AP009380 | PGN_1392  | conserved hypothetical protein                                              | 1547949 | 1548041 | 93   | reverse | 1.089 | 0.123  | 0.655 | 0.759 | 0.276 | 0.446  | CDS  | GI:188594936 | BAG33911.1 |
| AP009380 | PGN_1393  | putative DNA-binding protein HU                                             | 1548072 | 1548350 | 279  | reverse | 1.092 | 0.127  | 0.629 | 0.738 | 0.262 | 0.484  | CDS  | GI:188594937 | BAG33912.1 |
| AP009380 | PGN_1394  | transposase in ISPg2                                                        | 1548462 | 1549592 | 1131 | reverse | 1.736 | 0.796  | 0.038 | 0.107 | 0.384 | 2.075  | CDS  | GI:188594938 | BAG33913.1 |
| AP009380 | PGN_1395  | putative anaerobic ribonucleoside-triphosphate reductase activating protein | 1549744 | 1550247 | 504  | reverse | 1.018 | 0.025  | 0.925 | 0.952 | 0.268 | 0.095  | CDS  | GI:188594939 | BAG33914.1 |
| AP009380 | PGN_1396  | anaerobic ribonucleoside-triphosphate reductase                             | 1550268 | 1552664 | 2397 | reverse | 0.588 | -0.766 | 0.011 | 0.047 | 0.302 | -2.534 | CDS  | GI:188594940 | BAG33915.1 |
| AP009380 | PGN_1397  | transposase in ISPg1                                                        | 1553593 | 1554678 | 1086 | forward | 0.633 | -0.659 | 0.139 | 0.263 | 0.446 | -1.478 | CDS  | GI:188594941 | BAG33916.1 |
| AP009380 | PGN_r0007 | 5S ribosomal RNA                                                            | 1554965 | 1555072 | 108  | reverse | 0.259 | -1.950 | 0.000 | 0.000 | 0.461 | -4.227 | rRNA |              |            |
| AP009380 | PGN_r0008 | 23S ribosomal RNA                                                           | 1555219 | 1558051 | 2833 | reverse | 0.490 | -1.028 | 0.000 | 0.001 | 0.260 | -3.953 | rRNA |              |            |
| AP009380 | PGN_10035 | tRNA-Ala                                                                    | 1558170 | 1558246 | 77   | reverse | 0.495 | -1.015 | 0.006 | 0.032 | 0.373 | -2.724 | tRNA |              |            |
| AP009380 | PGN_10036 | tRNA-Ile                                                                    | 1558248 | 1558321 | 74   | reverse | 0.413 | -1.277 | 0.007 | 0.033 | 0.474 | -2.697 | tRNA |              |            |
| AP009380 | PGN_1398  | conserved hypothetical protein                                              | 1558331 | 1558486 | 156  | reverse | 1.076 | 0.106  | 0.618 | 0.729 | 0.212 | 0.499  | CDS  | GI:188594942 | BAG33917.1 |
| AP009380 | PGN_1399  | conserved hypothetical protein                                              | 1558613 | 1558771 | 159  | reverse | 0.885 | -0.176 | 0.468 | 0.607 | 0.242 | -0.725 | CDS  | GI:188594943 | BAG33918.1 |
| AP009380 | PGN_r0009 | 16S ribosomal RNA                                                           | 1558884 | 1560358 | 1475 | reverse | 0.636 | -0.654 | 0.002 | 0.015 | 0.214 | -3.056 | rRNA |              |            |
| AP009380 | PGN_1400  | conserved hypothetical protein                                              | 1560609 | 1560773 | 165  | forward | 0.962 | -0.056 | 0.809 | 0.873 | 0.231 | -0.242 | CDS  | GI:188594944 | BAG33919.1 |
| AP009380 | PGN_1401  | delta-1-pyrroline-5-carboxylate dehydrogenase                               | 1561167 | 1562798 | 1632 | reverse | 1.876 | 0.908  | 0.004 | 0.021 | 0.311 | 2.919  | CDS  | GI:188594945 | BAG33920.1 |
| AP009380 | PGN_1402  | putative amidinotransferase                                                 | 1562875 | 1563804 | 930  | reverse | 1.246 | 0.317  | 0.150 | 0.278 | 0.220 | 1.440  | CDS  | GI:188594946 | BAG33921.1 |
| AP009380 | PGN_1403  | ornithine aminotransferase                                                  | 1563811 | 1565040 | 1230 | reverse | 1.174 | 0.231  | 0.278 | 0.426 | 0.213 | 1.084  | CDS  | GI:188594947 | BAG33922.1 |
| AP009380 | PGN_1404  | conserved hypothetical protein                                              | 1565279 | 1565434 | 156  | reverse | 0.990 | -0.015 | 0.953 | 0.968 | 0.248 | -0.059 | CDS  | GI:188594948 | BAG33923.1 |
| AP009380 | PGN_1405  | elongation factor P                                                         | 1565490 | 1566056 | 567  | forward | 1.419 | 0.505  | 0.034 | 0.099 | 0.238 | 2.119  | CDS  | GI:188594949 | BAG33924.1 |
| AP009380 | PGN_1406  | hypothetical protein                                                        | 1566354 | 1566569 | 216  | forward | 0.804 | -0.315 | 0.230 | 0.372 | 0.262 | -1.201 | CDS  | GI:188594950 | BAG3       |

|          |           |                                                                     |       |         |         |      |         |       |        |       |       |       |        |      |              |            |
|----------|-----------|---------------------------------------------------------------------|-------|---------|---------|------|---------|-------|--------|-------|-------|-------|--------|------|--------------|------------|
| AP009380 | PGN_1429  | conserved hypothetical protein                                      |       | 1591072 | 1591371 | 300  | reverse | 4.301 | 2.105  | 0.000 | 0.000 | 0.275 | 7.661  | CDS  | GI:188594973 | BAG33948.1 |
| AP009380 | PGN_1430  | putative transmembrane Acr-type transport protein                   |       | 1591356 | 1594505 | 3150 | reverse | 4.824 | 2.270  | 0.000 | 0.000 | 0.235 | 9.672  | CDS  | GI:188594974 | BAG33949.1 |
| AP009380 | PGN_1431  | putative cation efflux system protein                               |       | 1594502 | 1595563 | 1062 | reverse | 3.999 | 2.000  | 0.000 | 0.000 | 0.205 | 9.743  | CDS  | GI:188594975 | BAG33950.1 |
| AP009380 | PGN_1432  | probable outer membrane efflux protein                              |       | 1595599 | 1596987 | 1389 | reverse | 2.848 | 1.510  | 0.000 | 0.000 | 0.182 | 8.274  | CDS  | GI:188594976 | BAG33951.1 |
| AP009380 | PGN_1433  | transposase in ISPg1                                                |       | 1597755 | 1598840 | 1086 | reverse | 0.621 | -0.688 | 0.139 | 0.262 | 0.465 | -1.481 | CDS  | GI:188594977 | BAG33952.1 |
| AP009380 | PGN_1434  | aminoacyl-histidine dipeptidase                                     |       | 1592906 | 1600666 | 1461 | reverse | 1.006 | 0.009  | 0.968 | 0.976 | 0.234 | 0.039  | CDS  | GI:188594978 | BAG33953.1 |
| AP009380 | PGN_1435  | hypothetical protein                                                |       | 1600747 | 1600962 | 216  | forward | 0.649 | -0.623 | 0.056 | 0.140 | 0.327 | -1.908 | CDS  | GI:188594979 | BAG33954.1 |
| AP009380 | PGN_1436  | conserved hypothetical protein                                      |       | 1600995 | 1601615 | 621  | forward | 0.745 | -0.425 | 0.183 | 0.319 | 0.319 | -1.331 | CDS  | GI:188594980 | BAG33955.1 |
| AP009380 | PGN_1437  | conserved hypothetical protein                                      |       | 1601796 | 1604279 | 2484 | reverse | 1.212 | 0.278  | 0.183 | 0.319 | 0.209 | 1.331  | CDS  | GI:188594981 | BAG33956.1 |
| AP009380 | PGN_1438  | hypothetical protein                                                |       | 1604431 | 1604523 | 93   | reverse | 0.663 | -0.593 | 0.029 | 0.090 | 0.272 | -2.180 | CDS  | GI:188594982 | BAG33957.1 |
| AP009380 | PGN_10037 | tRNA-Gly                                                            |       | 1604695 | 1604770 | 76   | reverse | 0.379 | -1.401 | 0.002 | 0.015 | 0.460 | -3.048 | tRNA |              |            |
| AP009380 | PGN_1439  | hypothetical protein                                                |       | 1604744 | 1604854 | 111  | forward | 0.393 | -1.346 | 0.002 | 0.015 | 0.442 | -3.046 | CDS  | GI:188594983 | BAG33958.1 |
| AP009380 | PGN_10038 | tRNA-Leu                                                            |       | 1604819 | 1604903 | 85   | reverse | 0.595 | -0.748 | 0.008 | 0.039 | 0.284 | -2.632 | tRNA |              |            |
| AP009380 | PGN_10039 | tRNA-Gly                                                            |       | 1604920 | 1604992 | 73   | reverse | 0.547 | -0.870 | 0.010 | 0.044 | 0.339 | -2.566 | tRNA |              |            |
| AP009380 | PGN_10040 | tRNA-Tyr                                                            |       | 1605026 | 1605108 | 83   | reverse | 0.530 | -0.915 | 0.005 | 0.029 | 0.329 | -2.777 | tRNA |              |            |
| AP009380 | PGN_1440  | putative vancomycin B-type resistance protein VanW                  |       | 1605477 | 1606325 | 849  | forward | 1.273 | 0.348  | 0.151 | 0.278 | 0.242 | 1.438  | CDS  | GI:188594984 | BAG33959.1 |
| AP009380 | PGN_1441  | glutamine-dependent NAD synthetase                                  |       | 1606435 | 1608378 | 1944 | forward | 1.738 | 0.798  | 0.003 | 0.017 | 0.265 | 3.009  | CDS  | GI:188594985 | BAG33960.1 |
| AP009380 | PGN_1442  | transposase in ISPg1                                                |       | 1608491 | 1609576 | 1086 | forward | 0.626 | -0.676 | 0.124 | 0.245 | 0.440 | -1.537 | CDS  | GI:188594986 | BAG33961.1 |
| AP009380 | PGN_1443  | carbamoyl-phosphate synthase large subunit                          |       | 1609916 | 1613143 | 3228 | reverse | 0.986 | -0.021 | 0.943 | 0.961 | 0.286 | -0.072 | CDS  | GI:188594987 | BAG33962.1 |
| AP009380 | PGN_1444  | carbamoyl-phosphate synthase small subunit                          |       | 1613162 | 1614235 | 1074 | reverse | 0.779 | -0.360 | 0.152 | 0.280 | 0.252 | -1.432 | CDS  | GI:188594988 | BAG33963.1 |
| AP009380 | PGN_1445  | putative amidophosphoribosyltransferase                             |       | 1614269 | 1616152 | 1884 | reverse | 1.084 | 0.117  | 0.657 | 0.760 | 0.264 | 0.443  | CDS  | GI:188594989 | BAG33964.1 |
| AP009380 | PGN_1446  | conserved hypothetical protein                                      |       | 1616242 | 1618125 | 1884 | reverse | 1.725 | 0.786  | 0.003 | 0.019 | 0.267 | 2.945  | CDS  | GI:188594990 | BAG33965.1 |
| AP009380 | PGN_1447  | CTP synthase                                                        |       | 1618253 | 1619872 | 1620 | reverse | 1.241 | 0.312  | 0.136 | 0.260 | 0.209 | 1.490  | CDS  | GI:188594991 | BAG33966.1 |
| AP009380 | PGN_1448  | conserved hypothetical protein                                      |       | 1619988 | 1620272 | 285  | reverse | 0.420 | -1.251 | 0.002 | 0.016 | 0.414 | -0.026 | CDS  | GI:188594992 | BAG33967.1 |
| AP009380 | PGN_1449  | inosine-5'-monophosphate dehydrogenase                              |       | 1620527 | 1622023 | 1497 | forward | 1.833 | 0.874  | 0.010 | 0.042 | 0.338 | 2.588  | CDS  | GI:188594993 | BAG33968.1 |
| AP009380 | PGN_1450  | putative tRNA isopentenyltransferase                                |       | 1622020 | 1622928 | 909  | forward | 2.237 | 1.161  | 0.004 | 0.022 | 0.400 | 2.900  | CDS  | GI:188594994 | BAG33969.1 |
| AP009380 | PGN_1451  | chaperonin GroES                                                    | groES | 1623145 | 1623414 | 270  | forward | 0.354 | -1.498 | 0.002 | 0.013 | 0.480 | -3.121 | CDS  | GI:188594995 | BAG33970.1 |
| AP009380 | PGN_1452  | chaperonin GroEL                                                    | groEL | 1623453 | 1625090 | 1638 | forward | 0.392 | -1.352 | 0.001 | 0.006 | 0.397 | -3.404 | CDS  | GI:188594996 | BAG33971.1 |
| AP009380 | PGN_10041 | tRNA-Ser                                                            |       | 1625476 | 1625562 | 87   | forward | 0.341 | -1.550 | 0.002 | 0.014 | 0.504 | -3.079 | tRNA |              |            |
| AP009380 | PGN_1453  | conserved hypothetical protein                                      |       | 1625660 | 1625770 | 111  | reverse | 0.441 | -1.181 | 0.000 | 0.002 | 0.310 | -3.816 | CDS  | GI:188594997 | BAG33972.1 |
| AP009380 | PGN_1454  | probable abortive infection protein                                 |       | 1625770 | 1626495 | 726  | forward | 1.034 | 0.048  | 0.853 | 0.905 | 0.257 | 0.185  | CDS  | GI:188594998 | BAG33973.1 |
| AP009380 | PGN_1455  | conserved hypothetical protein                                      |       | 1626471 | 1629494 | 3024 | forward | 1.108 | 0.148  | 0.528 | 0.656 | 0.235 | 0.631  | CDS  | GI:188594999 | BAG33974.1 |
| AP009380 | PGN_1456  | conserved hypothetical protein                                      |       | 1629525 | 1630772 | 1248 | forward | 0.713 | -0.489 | 0.022 | 0.073 | 0.213 | -2.290 | CDS  | GI:188595000 | BAG33975.1 |
| AP009380 | PGN_1457  | probable alkaline phosphatase                                       |       | 1630769 | 1632346 | 1578 | forward | 1.096 | 0.133  | 0.502 | 0.635 | 0.198 | 0.672  | CDS  | GI:188595001 | BAG33976.1 |
| AP009380 | PGN_1458  | preprotein translocase SecA subunit                                 |       | 1632440 | 1635781 | 3342 | forward | 1.366 | 0.450  | 0.073 | 0.168 | 0.251 | 1.792  | CDS  | GI:188595002 | BAG33977.1 |
| AP009380 | PGN_1459  | conserved hypothetical protein                                      |       | 1635885 | 1636763 | 879  | forward | 1.768 | 0.822  | 0.027 | 0.085 | 0.372 | 2.209  | CDS  | GI:188595003 | BAG33978.1 |
| AP009380 | PGN_1460  | putative guanlylate kinase                                          |       | 1636796 | 1637362 | 567  | forward | 1.493 | 0.578  | 0.108 | 0.222 | 0.360 | 1.608  | CDS  | GI:188595004 | BAG33979.1 |
| AP009380 | PGN_1461  | putative spore maturation protein A/B                               |       | 1637382 | 1638614 | 1233 | forward | 1.683 | 0.751  | 0.059 | 0.144 | 0.398 | 1.888  | CDS  | GI:188595005 | BAG33980.1 |
| AP009380 | PGN_1462  | conserved hypothetical protein                                      |       | 1638650 | 1639105 | 456  | forward | 1.090 | 0.124  | 0.728 | 0.811 | 0.356 | 0.347  | CDS  | GI:188595006 | BAG33981.1 |
| AP009380 | PGN_1463  | probable UbiA prenyltransferase                                     |       | 1639122 | 1639982 | 861  | forward | 1.782 | 0.834  | 0.040 | 0.110 | 0.406 | 2.055  | CDS  | GI:188595007 | BAG33982.1 |
| AP009380 | PGN_1464  | probable HAD-superfamily subfamily IB hydrolase                     |       | 1639972 | 1640574 | 603  | forward | 2.371 | 1.246  | 0.003 | 0.019 | 0.421 | 2.960  | CDS  | GI:188595008 | BAG33983.1 |
| AP009380 | PGN_1465  | hypothetical protein                                                |       | 1640938 | 1641126 | 189  | reverse | 1.951 | 0.964  | 0.024 | 0.078 | 0.428 | 2.252  | CDS  | GI:188595009 | BAG33984.1 |
| AP009380 | PGN_1466  | arginine-specific cysteine proteinase RgpB                          | rgpB  | 1641155 | 1643365 | 2211 | reverse | 2.118 | 1.082  | 0.006 | 0.029 | 0.392 | 2.760  | CDS  | GI:188595010 | BAG33985.1 |
| AP009380 | PGN_1467  | conserved hypothetical protein                                      |       | 1643383 | 1643505 | 123  | reverse | 1.214 | 0.279  | 0.405 | 0.545 | 0.386 | 0.832  | CDS  | GI:188595011 | BAG33986.1 |
| AP009380 | PGN_1468  | putative lipico acid synthase                                       |       | 1643618 | 1644466 | 849  | reverse | 1.796 | 0.845  | 0.020 | 0.070 | 0.364 | 2.319  | CDS  | GI:188595012 | BAG33987.1 |
| AP009380 | PGN_1469  | dipeptidyl peptidase IV                                             | dppIV | 1644569 | 1646740 | 2172 | reverse | 2.159 | 1.110  | 0.001 | 0.009 | 0.342 | 3.248  | CDS  | GI:188595013 | BAG33988.1 |
| AP009380 | PGN_1470  | putative SsrA-binding protein                                       |       | 1646780 | 1647241 | 462  | reverse | 2.013 | 1.009  | 0.000 | 0.005 | 0.289 | 3.493  | CDS  | GI:188595014 | BAG33989.1 |
| AP009380 | PGN_1471  | conserved hypothetical protein                                      |       | 1647274 | 1648365 | 1092 | reverse | 1.646 | 0.719  | 0.005 | 0.028 | 0.258 | 2.788  | CDS  | GI:188595015 | BAG33990.1 |
| AP009380 | PGN_1472  | queuine tRNA-ribosyltransferase                                     |       | 1648372 | 1649502 | 1131 | reverse | 1.194 | 0.256  | 0.237 | 0.381 | 0.216 | 1.182  | CDS  | GI:188595016 | BAG33991.1 |
| AP009380 | PGN_1473  | hypothetical protein                                                |       | 1649813 | 1649947 | 135  | reverse | 1.662 | 0.733  | 0.042 | 0.115 | 0.361 | 2.030  | CDS  | GI:188595017 | BAG33992.1 |
| AP009380 | PGN_1474  | putative autoinducer-2 production protein LuxS                      |       | 1650319 | 1650798 | 480  | reverse | 1.657 | 0.729  | 0.040 | 0.110 | 0.355 | 2.056  | CDS  | GI:188595018 | BAG33993.1 |
| AP009380 | PGN_1475  | probable 5'-methylthioadenosine/S-adenosylhomocysteine nucleosidase |       | 1650823 | 1651509 | 687  | reverse | 1.321 | 0.401  | 0.244 | 0.389 | 0.345 | 1.165  | CDS  | GI:188595019 | BAG33994.1 |
| AP009380 | PGN_1476  | conserved hypothetical protein                                      |       | 1651912 | 1653306 | 1395 | reverse | 0.899 | -0.153 | 0.491 | 0.628 | 0.222 | -0.689 | CDS  | GI:188595020 | BAG33995.1 |
| AP009380 | PGN_1477  | conserved hypothetical protein                                      |       | 1653471 | 1653725 | 255  | forward | 0.405 | -1.303 | 0.000 | 0.000 | 0.308 | -4.235 | CDS  | GI:188595021 | BAG33996.1 |
| AP009380 | PGN_1478  | conserved hypothetical protein                                      |       | 1653919 | 1654077 | 159  | forward | 0.564 | -0.826 | 0.095 | 0.205 | 0.494 | -1.670 | CDS  | GI:188595022 | BAG33997.1 |
| AP009380 | PGN_1479  | dipeptidyl peptidase 7                                              | dpp7  | 1654445 | 1656583 | 2139 | reverse | 1.331 | 0.413  | 0.213 | 0.355 | 0.331 | 1.245  | CDS  | GI:188595023 | BAG33998.1 |
| AP009380 | PGN_1480  | conserved hypothetical protein with DUF389 domain                   |       | 1656599 | 1657939 | 1341 | reverse | 1.087 | 0.120  | 0.611 | 0.724 | 0.236 | 0.509  | CDS  | GI:188595024 | BAG33999.1 |
| AP009380 | PGN_1481  | putative polysaccharide biosynthesis protein                        |       | 1658039 | 1659523 | 1485 | reverse | 0.699 | -0.516 | 0.038 | 0.107 | 0.249 | -0.272 | CDS  | GI:188595025 | BAG34000.1 |
| AP009380 | PGN_1482  | holliday junction DNA helicase RuvB                                 | ruvB  | 1659567 | 1660661 | 1095 | reverse | 0.844 | -0.245 | 0.453 | 0.592 | 0.327 | -0.750 | CDS  | GI:188595026 | BAG34001.1 |
| AP009380 | PGN_1483  | conserved hypothetical protein                                      |       | 1661050 | 1661259 | 210  | reverse | 0.573 | -0.804 | 0.172 | 0.305 | 0.589 | -1.366 | CDS  | GI:188595027 | BAG34002.1 |
| AP009380 | PGN_1484  | putative methylated-DNA-protein-cysteine methyltransferase          |       | 1661501 | 1662013 | 513  | forward | 0.850 | -0.234 | 0.396 | 0.537 | 0.276 | -0.848 | CDS  | GI:188595028 | BAG34003.1 |
| AP009380 | PGN_1485  | conserved hypothetical protein                                      |       | 1662096 | 1662434 | 339  | forward | 0.833 | -0.263 | 0.303 | 0.451 | 0.255 | -1.030 | CDS  | GI:188595029 | BAG34004.1 |
| AP009380 | PGN_1486  | conserved hypothetical protein                                      |       | 1662562 | 1663569 | 1008 | forward | 1.328 | 0.410  | 0.021 | 0.071 | 0.177 | 2.311  |      |              |            |

|          |           |                                                                      |         |         |              |       |        |       |       |       |        |      |              |            |
|----------|-----------|----------------------------------------------------------------------|---------|---------|--------------|-------|--------|-------|-------|-------|--------|------|--------------|------------|
| AP009380 | PGN_1511  | probable hemolysin                                                   | 1688983 | 1690236 | 1254 reverse | 0.758 | -0.399 | 0.146 | 0.271 | 0.274 | -1.455 | CDS  | GI:188595055 | BAG34030.1 |
| AP009380 | PGN_1512  | conserved hypothetical protein                                       | 1690233 | 1690937 | 705 reverse  | 1.032 | 0.045  | 0.842 | 0.899 | 0.226 | 0.199  | CDS  | GI:188595056 | BAG34031.1 |
| AP009380 | PGN_1513  | conserved hypothetical protein                                       | 1690968 | 1692320 | 1353 reverse | 0.821 | -0.284 | 0.277 | 0.425 | 0.262 | -1.087 | CDS  | GI:188595057 | BAG34032.1 |
| AP009380 | PGN_1514  | conserved hypothetical protein                                       | 1692362 | 1693666 | 303 reverse  | 1.102 | 0.140  | 0.525 | 0.652 | 0.220 | 0.636  | CDS  | GI:188595058 | BAG34033.1 |
| AP009380 | PGN_1515  | conserved hypothetical protein                                       | 1693659 | 1694393 | 735 reverse  | 1.830 | 0.872  | 0.004 | 0.021 | 0.299 | 2.918  | CDS  | GI:188595059 | BAG34034.1 |
| AP009380 | PGN_1516  | probable molybdopterin biosynthesis MoeB protein                     | 1694449 | 1695198 | 750 reverse  | 1.597 | 0.675  | 0.030 | 0.091 | 0.310 | 2.175  | CDS  | GI:188595060 | BAG34035.1 |
| AP009380 | PGN_1517  | peptidase T                                                          | 1695286 | 1696503 | 1218 reverse | 1.908 | 0.932  | 0.000 | 0.000 | 0.197 | 4.732  | CDS  | GI:188595061 | BAG34036.1 |
| AP009380 | PGN_1518  | putative oligopeptide transporter                                    | 1696520 | 1698499 | 1980 reverse | 1.427 | 0.513  | 0.010 | 0.043 | 0.200 | 2.571  | CDS  | GI:188595062 | BAG34037.1 |
| AP009380 | PGN_1519  | hemagglutinin-related protein                                        | 1696888 | 1699734 | 1047 reverse | 1.076 | 0.105  | 0.613 | 0.725 | 0.208 | 0.506  | CDS  | GI:188595063 | BAG34038.1 |
| AP009380 | PGN_1520  | conserved hypothetical protein                                       | 1700387 | 1703017 | 2631 reverse | 0.716 | -0.481 | 0.159 | 0.288 | 0.342 | -1.409 | CDS  | GI:188595064 | BAG34039.1 |
| AP009380 | PGN_1521  | conserved hypothetical protein                                       | 1703024 | 1703923 | 900 reverse  | 0.604 | -0.728 | 0.046 | 0.122 | 0.365 | -1.994 | CDS  | GI:188595065 | BAG34040.1 |
| AP009380 | PGN_1522  | conserved hypothetical protein                                       | 1703920 | 1704861 | 942 reverse  | 0.709 | -0.497 | 0.150 | 0.278 | 0.345 | -1.441 | CDS  | GI:188595066 | BAG34041.1 |
| AP009380 | PGN_1523  | putative polysaccharide export outer membrane protein                | 1705044 | 1705850 | 807 forward  | 1.566 | 0.647  | 0.011 | 0.047 | 0.255 | 2.533  | CDS  | GI:188595067 | BAG34042.1 |
| AP009380 | PGN_1524  | conserved hypothetical protein                                       | 1705857 | 1708322 | 2466 forward | 1.209 | 0.274  | 0.238 | 0.382 | 0.232 | 1.180  | CDS  | GI:188595068 | BAG34043.1 |
| AP009380 | PGN_1525  | probable capsular polysaccharide biosynthesis protein                | 1708332 | 1709075 | 744 forward  | 1.356 | 0.439  | 0.134 | 0.258 | 0.293 | 1.498  | CDS  | GI:188595069 | BAG34044.1 |
| AP009380 | PGN_1526  | conserved hypothetical protein                                       | 1709234 | 1710349 | 1116 forward | 1.392 | 0.477  | 0.099 | 0.210 | 0.289 | 1.651  | CDS  | GI:188595070 | BAG34045.1 |
| AP009380 | PGN_1527  | conserved hypothetical protein                                       | 1710390 | 1711100 | 711 forward  | 1.676 | 0.745  | 0.018 | 0.065 | 0.315 | 2.366  | CDS  | GI:188595071 | BAG34046.1 |
| AP009380 | PGN_1528  | conserved hypothetical protein                                       | 1711104 | 1712510 | 1407 forward | 1.168 | 0.224  | 0.452 | 0.591 | 0.299 | 0.751  | CDS  | GI:188595072 | BAG34047.1 |
| AP009380 | PGN_1529  | putative oxidoreductase                                              | 1712740 | 1713747 | 1008 reverse | 1.512 | 0.596  | 0.079 | 0.179 | 0.339 | 1.757  | CDS  | GI:188595073 | BAG34048.1 |
| AP009380 | PGN_1530  | putative 2-oxoglutarate ferredoxin oxidoreductase subunit            | 1713774 | 1715633 | 1860 reverse | 1.126 | 0.171  | 0.562 | 0.685 | 0.294 | 0.580  | CDS  | GI:188595074 | BAG34049.1 |
| AP009380 | PGN_1531  | hypothetical protein                                                 | 1715781 | 1715924 | 144 reverse  | 0.358 | -1.482 | 0.001 | 0.006 | 0.436 | -3.396 | CDS  | GI:188595075 | BAG34050.1 |
| AP009380 | PGN_1532  | conserved hypothetical protein                                       | 1716139 | 1716351 | 213 forward  | 0.853 | -0.229 | 0.595 | 0.712 | 0.431 | -0.531 | CDS  | GI:188595076 | BAG34051.1 |
| AP009380 | PGN_1533  | putative carbonic anhydrase                                          | 1716533 | 1717261 | 729 reverse  | 1.492 | 0.577  | 0.014 | 0.054 | 0.235 | 2.462  | CDS  | GI:188595077 | BAG34052.1 |
| AP009380 | PGN_1534  | hypothetical protein                                                 | 1717564 | 1718631 | 1068 forward | 3.323 | 1.732  | 0.000 | 0.000 | 0.281 | 6.174  | CDS  | GI:188595078 | BAG34053.1 |
| AP009380 | PGN_1535  | hypothetical protein                                                 | 1718720 | 1719772 | 1053 forward | 2.217 | 1.149  | 0.000 | 0.001 | 0.286 | 4.014  | CDS  | GI:188595079 | BAG34054.1 |
| AP009380 | PGN_1536  | hypothetical protein                                                 | 1719926 | 1720966 | 1041 forward | 0.617 | -0.697 | 0.045 | 0.121 | 0.349 | -2.000 | CDS  | GI:188595080 | BAG34055.1 |
| AP009380 | PGN_1537  | probable cation efflux system protein                                | 1720984 | 1722084 | 1061 forward | 0.716 | -0.482 | 0.136 | 0.259 | 0.323 | -1.492 | CDS  | GI:188595081 | BAG34056.1 |
| AP009380 | PGN_1538  | putative cation efflux system                                        | 1722119 | 1725190 | 3072 forward | 0.950 | -0.075 | 0.718 | 0.806 | 0.206 | -0.361 | CDS  | GI:188595082 | BAG34057.1 |
| AP009380 | PGN_1539  | putative ABC transport system exported protein                       | 1725168 | 1726658 | 1491 forward | 1.200 | 0.263  | 0.435 | 0.573 | 0.337 | 0.781  | CDS  | GI:188595083 | BAG34058.1 |
| AP009380 | PGN_1540  | putative ABC transport membrane protein                              | 1726698 | 1729829 | 3132 forward | 1.143 | 0.193  | 0.563 | 0.685 | 0.334 | 0.579  | CDS  | GI:188595084 | BAG34059.1 |
| AP009380 | PGN_1541  | hypothetical protein                                                 | 1730076 | 1730201 | 126 forward  | 1.648 | 0.721  | 0.067 | 0.157 | 0.393 | 1.833  | CDS  | GI:188595085 | BAG34060.1 |
| AP009380 | PGN_1542  | putative esterase                                                    | 1730198 | 1731037 | 840 forward  | 1.326 | 0.407  | 0.060 | 0.146 | 0.217 | 1.880  | CDS  | GI:188595086 | BAG34061.1 |
| AP009380 | PGN_1543  | conserved hypothetical protein                                       | 1731073 | 1731732 | 660 reverse  | 0.947 | -0.078 | 0.714 | 0.805 | 0.214 | -0.366 | CDS  | GI:188595087 | BAG34062.1 |
| AP009380 | PGN_1544  | conserved hypothetical protein                                       | 1731713 | 1732057 | 345 reverse  | 0.445 | -1.167 | 0.001 | 0.007 | 0.350 | -3.334 | CDS  | GI:188595088 | BAG34063.1 |
| AP009380 | PGN_1545  | hypothetical protein                                                 | 1732120 | 1732305 | 186 reverse  | 0.946 | -0.080 | 0.889 | 0.932 | 0.575 | -0.140 | CDS  | GI:188595089 | BAG34064.1 |
| AP009380 | PGN_1546  | hypothetical protein                                                 | 1732358 | 1732561 | 204 reverse  | 0.464 | -1.107 | 0.009 | 0.042 | 0.427 | -2.594 | CDS  | GI:188595090 | BAG34065.1 |
| AP009380 | PGN_1547  | conserved hypothetical protein                                       | 1732564 | 1733421 | 858 forward  | 1.022 | 0.032  | 0.916 | 0.949 | 0.300 | 0.105  | CDS  | GI:188595091 | BAG34066.1 |
| AP009380 | PGN_1548  | conserved hypothetical protein                                       | 1733705 | 1734565 | 861 forward  | 0.428 | -1.225 | 0.001 | 0.007 | 0.368 | -3.327 | CDS  | GI:188595092 | BAG34067.1 |
| AP009380 | PGN_1549  | putative ATP-dependent Clp protease proteolytic subunit              | 1734938 | 1735606 | 669 forward  | 0.795 | -0.331 | 0.322 | 0.472 | 0.334 | -0.990 | CDS  | GI:188595093 | BAG34068.1 |
| AP009380 | PGN_1550  | ATP-dependent Clp protease ATP-binding subunit ClpX                  | 1735643 | 1736878 | 1236 forward | 0.614 | -0.703 | 0.069 | 0.161 | 0.387 | -1.819 | CDS  | GI:188595094 | BAG34069.1 |
| AP009380 | PGN_1551  | ATP-dependent DNA helicase RecQ                                      | 1736957 | 1739134 | 2178 forward | 0.722 | -0.470 | 0.079 | 0.179 | 0.268 | -1.755 | CDS  | GI:188595095 | BAG34070.1 |
| AP009380 | PGN_1552  | putative peptidyl-prolyl cis-trans isomerase                         | 1739171 | 1740553 | 1383 forward | 0.905 | -0.143 | 0.550 | 0.675 | 0.240 | -0.598 | CDS  | GI:188595096 | BAG34071.1 |
| AP009380 | PGN_1553  | conserved hypothetical protein                                       | 1740615 | 1742495 | 1881 forward | 1.303 | 0.382  | 0.160 | 0.289 | 0.271 | 1.406  | CDS  | GI:188595097 | BAG34072.1 |
| AP009380 | PGN_1554  | conserved hypothetical protein                                       | 1742486 | 1742830 | 345 forward  | 1.626 | 0.701  | 0.017 | 0.062 | 0.293 | 2.391  | CDS  | GI:188595098 | BAG34073.1 |
| AP009380 | PGN_1555  | DNA mismatch repair protein MutL                                     | 1742827 | 1744683 | 1857 forward | 0.716 | -0.482 | 0.141 | 0.265 | 0.328 | -1.471 | CDS  | GI:188595099 | BAG34074.1 |
| AP009380 | PGN_1556  | putative hemagglutinin                                               | 1744939 | 1747716 | 2778 reverse | 0.490 | -1.030 | 0.037 | 0.104 | 0.493 | -2.091 | CDS  | GI:188595100 | BAG34075.1 |
| AP009380 | PGN_1557  | conserved hypothetical protein                                       | 1748075 | 1748896 | 822 reverse  | 1.105 | 0.144  | 0.655 | 0.759 | 0.323 | 0.446  | CDS  | GI:188595101 | BAG34076.1 |
| AP009380 | PGN_1558  | conserved hypothetical protein                                       | 1748910 | 1749380 | 471 forward  | 1.230 | 0.299  | 0.330 | 0.480 | 0.307 | 0.974  | CDS  | GI:188595102 | BAG34077.1 |
| AP009380 | PGN_1559  | hypothetical protein                                                 | 1749467 | 1749682 | 216 reverse  | 0.365 | -1.454 | 0.000 | 0.000 | 0.333 | -4.366 | CDS  | GI:188595103 | BAG34078.1 |
| AP009380 | PGN_1560  | conserved hypothetical protein                                       | 1749838 | 1749981 | 144 forward  | 0.775 | -0.368 | 0.270 | 0.417 | 0.334 | -1.103 | CDS  | GI:188595104 | BAG34079.1 |
| AP009380 | PGN_1561  | conserved hypothetical protein                                       | 1750327 | 1750623 | 297 forward  | 0.837 | -0.256 | 0.337 | 0.487 | 0.267 | -0.960 | CDS  | GI:188595105 | BAG34080.1 |
| AP009380 | PGN_1562  | conserved hypothetical protein                                       | 1750630 | 1750938 | 309 forward  | 0.955 | -0.066 | 0.803 | 0.868 | 0.265 | -0.250 | CDS  | GI:188595106 | BAG34081.1 |
| AP009380 | PGN_1563  | hypothetical protein                                                 | 1750980 | 1751078 | 99 reverse   | 0.882 | -0.181 | 0.657 | 0.760 | 0.407 | -0.445 | CDS  | GI:188595107 | BAG34082.1 |
| AP009380 | PGN_1564  | conserved hypothetical protein                                       | 1751085 | 1752626 | 1542 forward | 0.944 | -0.084 | 0.799 | 0.866 | 0.330 | -0.254 | CDS  | GI:188595108 | BAG34083.1 |
| AP009380 | PGN_1565  | conserved hypothetical protein with P5P1 C-terminal conserved region | 1752731 | 1754143 | 1413 forward | 1.335 | 0.417  | 0.180 | 0.314 | 0.310 | 1.342  | CDS  | GI:188595109 | BAG34084.1 |
| AP009380 | PGN_1566  | conserved hypothetical protein                                       | 1754151 | 1754681 | 531 forward  | 1.278 | 0.354  | 0.208 | 0.349 | 0.281 | 1.258  | CDS  | GI:188595110 | BAG34085.1 |
| AP009380 | PGN_1567  | putative DNA replication and repair protein RecF                     | 1754678 | 1755772 | 1095 forward | 1.098 | 0.135  | 0.613 | 0.725 | 0.267 | 0.506  | CDS  | GI:188595111 | BAG34086.1 |
| AP009380 | PGN_1568  | conserved hypothetical protein                                       | 1755786 | 1756076 | 291 forward  | 1.207 | 0.271  | 0.368 | 0.511 | 0.301 | 0.901  | CDS  | GI:188595112 | BAG34087.1 |
| AP009380 | PGN_1569  | probable transcriptional regulator Crp/Fnr family                    | 1756125 | 1756823 | 699 reverse  | 0.911 | -0.135 | 0.530 | 0.656 | 0.215 | -0.628 | CDS  | GI:188595113 | BAG34088.1 |
| AP009380 | PGN_1570  | DNA-directed RNA polymerase beta' subunit                            | 1757112 | 1761413 | 4302 reverse | 1.210 | 0.275  | 0.324 | 0.474 | 0.279 | 0.987  | CDS  | GI:188595114 | BAG34089.1 |
| AP009380 | PGN_1571  | DNA-directed RNA polymerase beta subunit                             | 1761479 | 1765288 | 3810 reverse | 1.304 | 0.383  | 0.151 | 0.279 | 0.266 | 1.436  | CDS  | GI:188595115 | BAG34090.1 |
| AP009380 | PGN_1572  | putative 50S ribosomal protein L7/L12                                | 1765400 | 1765777 | 378 reverse  | 0.875 | -0.192 | 0.471 | 0.609 | 0.266 | -0.721 | CDS  | GI:188595116 | BAG34091.1 |
| AP009380 | PGN_1573  | putative 50S ribosomal protein L10                                   | 1765819 | 1766343 | 525 reverse  | 0.820 | -0.285 | 0.222 | 0.365 | 0.234 | -1.221 | CDS  | GI:188595117 | BAG34092.1 |
| AP009380 | PGN_1574  | 50S ribosomal protein L1                                             | 1766359 | 1767055 | 699 reverse  | 0.896 | -0.159 | 0.552 | 0.676 | 0.268 | -0.594 | CDS  | GI:188595118 | BAG34093.1 |
| AP009380 | PGN_1575  | 50S ribosomal protein L11                                            | 1767078 | 1767515 | 438 reverse  | 0.766 | -0.385 | 0.103 | 0.217 | 0.236 | -1.629 | CDS  | GI:188595119 | BAG34094.1 |
| AP009380 | PGN_1576  | putative transcription antitermination protein                       | 1767584 | 1768123 | 540 reverse  | 0.817 | -0.291 | 0.245 | 0.390 | 0.250 | -1.163 | CDS  | GI:188595120 | BAG34095.1 |
| AP009380 | PGN_1577  | putative preprotein translocase SecE subunit                         | 1768145 | 1768348 | 204 reverse  | 0.648 | -0.626 | 0.011 | 0.047 | 0.247 | -2.534 | CDS  | GI:188595121 | BAG34096.1 |
| AP009380 | PGN_10042 | tRNA-Trp                                                             | 1768361 | 1768436 | 76 reverse   | 0.768 | -0.380 | 0.051 | 0.130 | 0.195 | -1.950 | tRNA |              |            |
| AP009380 | PGN_1578  | translation elongation factor Tu                                     | 1768507 | 1769694 | 1188 reverse | 0.766 | -0.384 | 0.151 | 0.278 | 0.267 | -1.438 | CDS  | GI:188595122 | BAG34097.1 |
| AP009380 | PGN_10043 | tRNA-Thr                                                             | 1769762 | 1769833 | 72 reverse   | 0.592 | -0.755 | 0.034 | 0.099 | 0.356 | -2.120 | tRNA |              |            |
| AP009380 | PGN_10044 | tRNA-Tyr                                                             | 1769863 | 1769948 | 86 reverse   | 0.489 | -1.032 | 0.006 | 0.030 | 0.375 | -2.752 | tRNA |              |            |
| AP009380 | PGN_1579  | putative site-specific recombinase                                   | 1770088 | 1771293 | 1206 reverse | 0.664 | -0.590 | 0.131 | 0.254 | 0.391 | -1.508 | CDS  | GI:188595123 | BAG34098.1 |
| AP009380 | PGN_1580  | putative 30S ribosomal protein S21                                   | 1771370 | 1771561 | 192 reverse  | 0.755 | -0.406 | 0.110 | 0.226 | 0.254 | -1.597 | CDS  | GI:188595124 | BAG34099.1 |
| AP009380 | PGN_1581  | DNA mismatch repair protein MutS                                     | 1771723 | 177     |              |       |        |       |       |       |        |      |              |            |



|          |          |                                                                   |         |         |              |       |        |       |       |       |        |     |              |            |
|----------|----------|-------------------------------------------------------------------|---------|---------|--------------|-------|--------|-------|-------|-------|--------|-----|--------------|------------|
| AP009380 | PGN_1595 | conserved hypothetical protein                                    | 1787923 | 1788483 | 561 forward  | 0.941 | -0.088 | 0.681 | 0.779 | 0.215 | -0.411 | CDS | GI:188595139 | BAG34114.1 |
| AP009380 | PGN_1596 | probable 3'-5' exonuclease                                        | 1788524 | 1789126 | 603 forward  | 1.415 | 0.501  | 0.030 | 0.091 | 0.230 | 2.176  | CDS | GI:188595140 | BAG34115.1 |
| AP009380 | PGN_1597 | conserved hypothetical protein                                    | 1789123 | 1790328 | 1206 forward | 1.335 | 0.417  | 0.062 | 0.149 | 0.223 | 1.869  | CDS | GI:188595141 | BAG34116.1 |
| AP009380 | PGN_1598 | probable glutamine ABC transporter                                | 1790391 | 1791218 | 828 reverse  | 1.675 | 0.744  | 0.004 | 0.024 | 0.260 | 2.858  | CDS | GI:188595142 | BAG34117.1 |
| AP009380 | PGN_1599 | conserved hypothetical protein                                    | 1791219 | 1793309 | 2091 reverse | 1.636 | 0.710  | 0.002 | 0.014 | 0.230 | 3.083  | CDS | GI:188595143 | BAG34118.1 |
| AP009380 | PGN_1600 | conserved hypothetical protein                                    | 1793287 | 1794555 | 1269 reverse | 0.913 | -0.132 | 0.659 | 0.761 | 0.299 | -0.441 | CDS | GI:188595144 | BAG34119.1 |
| AP009380 | PGN_1601 | conserved hypothetical protein with lemA family domain            | 1794616 | 1795212 | 597 reverse  | 1.058 | 0.081  | 0.759 | 0.835 | 0.265 | 0.307  | CDS | GI:188595145 | BAG34120.1 |
| AP009380 | PGN_1602 | putative flavoredoxin                                             | 1795250 | 1795837 | 588 reverse  | 1.297 | 0.375  | 0.142 | 0.266 | 0.255 | 1.469  | CDS | GI:188595146 | BAG34121.1 |
| AP009380 | PGN_1603 | aspartate carbamoyltransferase regulatory subunit                 | 1795866 | 1796321 | 456 reverse  | 1.514 | 0.598  | 0.048 | 0.124 | 0.302 | 1.979  | CDS | GI:188595147 | BAG34122.1 |
| AP009380 | PGN_1604 | aspartate carbamoyltransferase catalytic subunit                  | 1796334 | 1797248 | 915 reverse  | 1.255 | 0.327  | 0.152 | 0.279 | 0.228 | 1.434  | CDS | GI:188595148 | BAG34123.1 |
| AP009380 | PGN_1605 | conserved hypothetical protein                                    | 1797295 | 1798032 | 738 reverse  | 1.237 | 0.307  | 0.130 | 0.252 | 0.202 | 1.515  | CDS | GI:188595149 | BAG34124.1 |
| AP009380 | PGN_1606 | conserved hypothetical protein                                    | 1798061 | 1799044 | 984 reverse  | 1.203 | 0.267  | 0.220 | 0.363 | 0.217 | 1.227  | CDS | GI:188595150 | BAG34125.1 |
| AP009380 | PGN_1607 | hypothetical protein                                              | 1799172 | 1799357 | 186 forward  | 0.616 | -0.698 | 0.134 | 0.258 | 0.466 | -1.499 | CDS | GI:188595151 | BAG34126.1 |
| AP009380 | PGN_1608 | neuraminidase                                                     | 1799422 | 1801002 | 1581 reverse | 0.904 | -0.146 | 0.621 | 0.732 | 0.295 | -0.495 | CDS | GI:188595152 | BAG34127.1 |
| AP009380 | PGN_1609 | hypothetical protein                                              | 1801024 | 1801113 | 90 forward   | 0.592 | -0.755 | 0.101 | 0.214 | 0.461 | -1.639 | CDS | GI:188595153 | BAG34128.1 |
| AP009380 | PGN_1610 | conserved hypothetical protein                                    | 1801155 | 1801415 | 261 reverse  | 0.427 | -1.228 | 0.000 | 0.000 | 0.273 | -4.497 | CDS | GI:188595154 | BAG34129.1 |
| AP009380 | PGN_1611 | conserved hypothetical protein                                    | 1801429 | 1802886 | 1458 forward | 1.204 | 0.267  | 0.198 | 0.337 | 0.208 | 1.286  | CDS | GI:188595155 | BAG34130.1 |
| AP009380 | PGN_1612 | probable beta-phosphoglucomutase                                  | 1802981 | 1803733 | 753 reverse  | 1.233 | 0.302  | 0.240 | 0.384 | 0.257 | 1.176  | CDS | GI:188595156 | BAG34131.1 |
| AP009380 | PGN_1613 | ATP-dependent DNA helicase RecG                                   | 1803751 | 1805847 | 2097 reverse | 0.817 | -0.292 | 0.378 | 0.520 | 0.331 | -0.881 | CDS | GI:188595157 | BAG34132.1 |
| AP009380 | PGN_1614 | UDP-glucose 4-epimerase                                           | 1805890 | 1806918 | 1029 reverse | 0.823 | -0.281 | 0.487 | 0.624 | 0.404 | -0.695 | CDS | GI:188595158 | BAG34133.1 |
| AP009380 | PGN_1615 | putative GTP-binding protein                                      | 1806928 | 1807533 | 606 reverse  | 0.565 | -0.823 | 0.030 | 0.092 | 0.379 | -2.170 | CDS | GI:188595159 | BAG34134.1 |
| AP009380 | PGN_1616 | conserved hypothetical protein                                    | 1807634 | 1808227 | 594 forward  | 0.790 | -0.339 | 0.360 | 0.505 | 0.371 | -0.915 | CDS | GI:188595160 | BAG34135.1 |
| AP009380 | PGN_1617 | probable metallophosphoesterase                                   | 1808230 | 1809699 | 1470 forward | 1.041 | 0.058  | 0.881 | 0.926 | 0.388 | 0.150  | CDS | GI:188595161 | BAG34136.1 |
| AP009380 | PGN_1618 | methionine gamma-lyase                                            | 1809862 | 1811061 | 1200 forward | 1.118 | 0.161  | 0.438 | 0.576 | 0.208 | 0.775  | CDS | GI:188595162 | BAG34137.1 |
| AP009380 | PGN_1619 | transposase in ISPg1                                              | 1811402 | 1812487 | 1086 reverse | 0.726 | -0.462 | 0.305 | 0.453 | 0.451 | -1.025 | CDS | GI:188595163 | BAG34138.1 |
| AP009380 | PGN_1620 | hypothetical protein                                              | 1813060 | 1813158 | 99 reverse   | 0.707 | -0.501 | 0.176 | 0.309 | 0.370 | -1.354 | CDS | GI:188595164 | BAG34139.1 |
| AP009380 | PGN_1621 | conserved hypothetical protein                                    | 1813177 | 1813413 | 237 reverse  | 0.434 | -1.204 | 0.000 | 0.000 | 0.284 | -4.243 | CDS | GI:188595165 | BAG34140.1 |
| AP009380 | PGN_1622 | conserved hypothetical protein                                    | 1813728 | 1814273 | 546 reverse  | 0.404 | -1.308 | 0.000 | 0.003 | 0.363 | -3.603 | CDS | GI:188595166 | BAG34141.1 |
| AP009380 | PGN_1623 | conserved hypothetical protein                                    | 1814278 | 1817637 | 3360 reverse | 0.749 | -0.417 | 0.152 | 0.279 | 0.291 | -1.434 | CDS | GI:188595167 | BAG34142.1 |
| AP009380 | PGN_1624 | conserved hypothetical protein                                    | 1817688 | 1817840 | 153 forward  | 0.460 | -1.120 | 0.004 | 0.021 | 0.384 | -2.916 | CDS | GI:188595168 | BAG34143.1 |
| AP009380 | PGN_1625 | conserved hypothetical protein                                    | 1817925 | 1818494 | 570 forward  | 0.704 | -0.507 | 0.028 | 0.086 | 0.230 | -2.202 | CDS | GI:188595169 | BAG34144.1 |
| AP009380 | PGN_1626 | putative tRNA isopentenyltransferase                              | 1818514 | 1819416 | 903 forward  | 1.212 | 0.277  | 0.325 | 0.474 | 0.282 | 0.984  | CDS | GI:188595170 | BAG34145.1 |
| AP009380 | PGN_1627 | probable 4-amino-4-deoxy-L-arabinose transferase                  | 1819556 | 1821070 | 1515 forward | 0.697 | -0.521 | 0.064 | 0.152 | 0.281 | -1.855 | CDS | GI:188595171 | BAG34146.1 |
| AP009380 | PGN_1628 | putative glycosyltransferases                                     | 1821098 | 1822057 | 960 forward  | 0.833 | -0.263 | 0.382 | 0.524 | 0.301 | -0.874 | CDS | GI:188595172 | BAG34147.1 |
| AP009380 | PGN_1629 | conserved hypothetical protein with integral membrane domain DUF6 | 1822068 | 1823141 | 1074 reverse | 0.940 | -0.089 | 0.766 | 0.841 | 0.298 | -0.298 | CDS | GI:188595173 | BAG34148.1 |
| AP009380 | PGN_1630 | transcription termination factor Rho                              | 1823204 | 1825180 | 1977 reverse | 1.311 | 0.391  | 0.056 | 0.139 | 0.204 | 1.912  | CDS | GI:188595174 | BAG34149.1 |
| AP009380 | PGN_1631 | putative DNA-binding protein histone-like family                  | 1825857 | 1826375 | 519 forward  | 0.839 | -0.253 | 0.405 | 0.545 | 0.303 | -0.834 | CDS | GI:188595175 | BAG34150.1 |
| AP009380 | PGN_1632 | hypothetical protein                                              | 1826408 | 1827403 | 996 forward  | 0.767 | -0.383 | 0.085 | 0.190 | 0.223 | -1.720 | CDS | GI:188595176 | BAG34151.1 |
| AP009380 | PGN_1633 | forminotransferase-cyclodextrinase                                | 1827444 | 1828346 | 903 forward  | 0.738 | -0.439 | 0.054 | 0.135 | 0.228 | -1.929 | CDS | GI:188595177 | BAG34152.1 |
| AP009380 | PGN_1634 | imidazolonepropiolase                                             | 1828447 | 1829718 | 1272 forward | 1.019 | 0.027  | 0.923 | 0.951 | 0.274 | 0.097  | CDS | GI:188595178 | BAG34153.1 |
| AP009380 | PGN_1635 | conserved hypothetical protein with nucleoside recognition domain | 1829813 | 1830966 | 1155 forward | 0.790 | -0.341 | 0.300 | 0.448 | 0.329 | -1.037 | CDS | GI:188595179 | BAG34154.1 |
| AP009380 | PGN_1636 | conserved hypothetical protein                                    | 1830986 | 1832134 | 1149 forward | 1.276 | 0.352  | 0.225 | 0.366 | 0.290 | 1.215  | CDS | GI:188595180 | BAG34155.1 |
| AP009380 | PGN_1637 | putative methyltetrahydrofolate cyclohydrolase                    | 1832159 | 1832788 | 630 forward  | 1.395 | 0.480  | 0.175 | 0.309 | 0.354 | 1.356  | CDS | GI:188595181 | BAG34156.1 |
| AP009380 | PGN_1638 | histidine ammonia-lyase                                           | 1832791 | 1834284 | 1494 forward | 1.037 | 0.052  | 0.867 | 0.916 | 0.310 | 1.668  | CDS | GI:188595182 | BAG34157.1 |
| AP009380 | PGN_1639 | conserved hypothetical protein                                    | 1834485 | 1834814 | 330 forward  | 3.833 | 1.938  | 0.000 | 0.000 | 0.249 | 7.784  | CDS | GI:188595183 | BAG34158.1 |
| AP009380 | PGN_1640 | serine/threonine transporter                                      | 1834937 | 1836115 | 1179 reverse | 1.126 | 0.171  | 0.378 | 0.520 | 0.194 | 0.882  | CDS | GI:188595184 | BAG34159.1 |
| AP009380 | PGN_1641 | arginine/ornithine transport system ATPase                        | 1836144 | 1837250 | 1107 reverse | 1.092 | 0.127  | 0.530 | 0.656 | 0.202 | 0.628  | CDS | GI:188595185 | BAG34160.1 |
| AP009380 | PGN_1642 | conserved hypothetical protein                                    | 1837326 | 1838414 | 1089 reverse | 0.720 | -0.474 | 0.090 | 0.198 | 0.280 | -1.694 | CDS | GI:188595186 | BAG34161.1 |
| AP009380 | PGN_1643 | conserved hypothetical protein                                    | 1838446 | 1838829 | 384 reverse  | 0.531 | -0.913 | 0.001 | 0.005 | 0.264 | -3.453 | CDS | GI:188595187 | BAG34162.1 |
| AP009380 | PGN_1644 | transposase in ISPg1                                              | 1839297 | 1840382 | 1086 reverse | 0.831 | -0.267 | 0.562 | 0.685 | 0.461 | -0.580 | CDS | GI:188595188 | BAG34163.1 |
| AP009380 | PGN_1645 | putative dipeptidyl peptidase III                                 | 1840723 | 1843443 | 2721 forward | 1.098 | 0.135  | 0.497 | 0.632 | 0.199 | 0.679  | CDS | GI:188595189 | BAG34164.1 |
| AP009380 | PGN_1646 | seryl-tRNA synthetase                                             | 1843456 | 1844727 | 1272 reverse | 1.118 | 0.160  | 0.370 | 0.514 | 0.179 | 0.896  | CDS | GI:188595190 | BAG34165.1 |
| AP009380 | PGN_1647 | putative 50S ribosomal protein L27                                | 1844827 | 1845084 | 258 reverse  | 0.987 | -0.019 | 0.936 | 0.956 | 0.234 | -0.080 | CDS | GI:188595191 | BAG34166.1 |
| AP009380 | PGN_1648 | putative 50S ribosomal protein L21                                | 1845112 | 1845429 | 318 reverse  | 0.968 | -0.047 | 0.849 | 0.903 | 0.246 | -0.190 | CDS | GI:188595192 | BAG34167.1 |
| AP009380 | PGN_1649 | conserved hypothetical protein                                    | 1845490 | 1845798 | 309 reverse  | 1.128 | 0.173  | 0.667 | 0.766 | 0.403 | 0.431  | CDS | GI:188595193 | BAG34168.1 |
| AP009380 | PGN_1650 | conserved hypothetical protein                                    | 1846156 | 1846695 | 540 forward  | 0.857 | -0.223 | 0.299 | 0.446 | 0.214 | -1.040 | CDS | GI:188595194 | BAG34169.1 |
| AP009380 | PGN_1651 | putative glycosyltransferase                                      | 1846692 | 1847645 | 954 forward  | 1.453 | 0.539  | 0.005 | 0.028 | 0.193 | 2.793  | CDS | GI:188595195 | BAG34170.1 |
| AP009380 | PGN_1652 | probable nitroreductase                                           | 1847645 | 1848184 | 540 forward  | 1.334 | 0.415  | 0.023 | 0.075 | 0.182 | 2.277  | CDS | GI:188595196 | BAG34171.1 |
| AP009380 | PGN_1653 | putative thiamine biosynthesis lipoprotein ApbE                   | 1848181 | 1849194 | 1014 forward | 1.251 | 0.323  | 0.089 | 0.196 | 0.190 | 1.702  | CDS | GI:188595197 | BAG34172.1 |
| AP009380 | PGN_1654 | putative electron transport complex RnfABCDGE type A subunit      | 1849409 | 1849981 | 573 reverse  | 1.325 | 0.406  | 0.166 | 0.297 | 0.293 | 1.386  | CDS | GI:188595198 | BAG34173.1 |
| AP009380 | PGN_1655 | putative electron transport complex RnfABCDGE type E subunit      | 1850006 | 1850591 | 591 reverse  | 1.216 | 0.283  | 0.223 | 0.366 | 0.232 | 1.218  | CDS | GI:188595199 | BAG34174.1 |
| AP009380 | PGN_1656 | putative electron transport complex RnfABCDGE type G subunit      | 1850593 | 1851270 | 678 reverse  | 1.129 | 0.175  | 0.438 | 0.576 | 0.226 | 0.776  | CDS | GI:188595200 | BAG34175.1 |
| AP009380 | PGN_1657 | electron transport complex RnfABCDGE type D subunit               | 1851267 | 1852250 | 984 reverse  | 1.121 | 0.164  | 0.459 | 0.598 | 0.222 | 0.740  | CDS | GI:188595201 | BAG34176.1 |
| AP009380 | PGN_1658 | electron transport complex RnfABCDGE type C subunit               | 1852266 | 1853597 | 1332 reverse | 1.242 | 0.312  | 0.133 | 0.256 | 0.208 | 1.503  | CDS | GI:188595202 | BAG34177.1 |
| AP009380 | PGN_1659 | putative electron transport complex RnfABCDGE type B subunit      | 1853633 | 1854505 | 873 reverse  | 0.992 | -0.011 | 0.958 | 0.970 | 0.220 | -0.052 | CDS | GI:188595203 | BAG34178.1 |
| AP009380 | PGN_1660 | conserved hypothetical protein                                    | 1854515 | 1854898 | 384 reverse  | 0.758 | -0.399 | 0.087 | 0.193 | 0.233 | -1.713 | CDS | GI:188595204 |            |

|          |          |                                                                       |       |         |         |      |         |       |        |       |       |       |        |     |              |            |
|----------|----------|-----------------------------------------------------------------------|-------|---------|---------|------|---------|-------|--------|-------|-------|-------|--------|-----|--------------|------------|
| AP009380 | PGN_1682 | probable ABC transporter permease protein                             |       | 1878518 | 1879894 | 1377 | forward | 0.570 | -0.812 | 0.009 | 0.041 | 0.311 | -2.610 | CDS | GI:188595226 | BAG34201.1 |
| AP009380 | PGN_1683 | probable ABC transporter permease protein                             |       | 1879916 | 1881244 | 1329 | forward | 0.877 | -0.189 | 0.542 | 0.669 | 0.311 | -0.609 | CDS | GI:188595227 | BAG34202.1 |
| AP009380 | PGN_1684 | hypothetical protein                                                  |       | 1881385 | 1881489 | 105  | reverse | 0.546 | -0.872 | 0.009 | 0.041 | 0.335 | -2.606 | CDS | GI:188595228 | BAG34203.1 |
| AP009380 | PGN_1685 | NADP-dependent malate dehydrogenase                                   |       | 1881584 | 1883866 | 2283 | forward | 0.992 | -0.012 | 0.961 | 0.971 | 0.242 | -0.049 | CDS | GI:188595229 | BAG34204.1 |
| AP009380 | PGN_1686 | hypothetical protein                                                  |       | 1883933 | 1884091 | 159  | forward | 1.004 | 0.006  | 0.982 | 0.984 | 0.265 | 0.023  | CDS | GI:188595230 | BAG34205.1 |
| AP009380 | PGN_1687 | conserved hypothetical protein                                        |       | 1884094 | 1884531 | 438  | reverse | 0.836 | -0.258 | 0.299 | 0.446 | 0.248 | -1.040 | CDS | GI:188595231 | BAG34206.1 |
| AP009380 | PGN_1688 | putative ribose 5-phosphate isomerase B                               |       | 1884566 | 1885003 | 438  | reverse | 1.224 | 0.292  | 0.327 | 0.477 | 0.298 | 0.979  | CDS | GI:188595232 | BAG34207.1 |
| AP009380 | PGN_1689 | transketolase                                                         |       | 1885090 | 1887117 | 2028 | reverse | 1.552 | 0.634  | 0.003 | 0.017 | 0.211 | 3.011  | CDS | GI:188595233 | BAG34208.1 |
| AP009380 | PGN_1690 | putative exported fucosidase                                          |       | 1887561 | 1889381 | 1821 | forward | 0.926 | -0.111 | 0.755 | 0.831 | 0.355 | -0.312 | CDS | GI:188595234 | BAG34209.1 |
| AP009380 | PGN_1691 | putative cysteine desulfurase                                         |       | 1889197 | 1894442 | 2526 | forward | 1.179 | 0.237  | 0.293 | 0.441 | 0.225 | 1.052  | CDS | GI:188595235 | BAG34210.1 |
| AP009380 | PGN_1692 | conserved hypothetical protein                                        |       | 1890632 | 1890856 | 225  | forward | 1.735 | 0.795  | 0.022 | 0.072 | 0.346 | 2.299  | CDS | GI:188595236 | BAG34211.1 |
| AP009380 | PGN_1693 | selenide water dikinase                                               |       | 1890853 | 1891899 | 1047 | forward | 1.792 | 0.842  | 0.017 | 0.063 | 0.354 | 2.379  | CDS | GI:188595237 | BAG34212.1 |
| AP009380 | PGN_1694 | putative alanyl dipeptidyl peptidase                                  |       | 1891917 | 1894442 | 2526 | forward | 2.992 | 1.581  | 0.000 | 0.002 | 0.413 | 3.832  | CDS | GI:188595238 | BAG34213.1 |
| AP009380 | PGN_1695 | putative fructose-bisphosphate aldolase class I                       |       | 1894585 | 1895466 | 882  | reverse | 0.908 | -0.140 | 0.596 | 0.713 | 0.264 | -0.530 | CDS | GI:188595239 | BAG34214.1 |
| AP009380 | PGN_1696 | conserved hypothetical protein                                        |       | 1895731 | 1895940 | 210  | forward | 0.950 | -0.075 | 0.872 | 0.919 | 0.463 | -0.161 | CDS | GI:188595240 | BAG34215.1 |
| AP009380 | PGN_1697 | conserved hypothetical protein                                        |       | 1896118 | 1897149 | 1032 | reverse | 1.625 | 0.700  | 0.001 | 0.006 | 0.205 | 3.411  | CDS | GI:188595241 | BAG34216.1 |
| AP009380 | PGN_1698 | putative 30S ribosomal protein S15                                    | rspO  | 1897422 | 1897691 | 270  | forward | 0.966 | -0.050 | 0.872 | 0.919 | 0.309 | -0.161 | CDS | GI:188595242 | BAG34217.1 |
| AP009380 | PGN_1699 | probable zinc ABC transporter zinc-binding protein                    |       | 1897807 | 1898754 | 948  | forward | 1.177 | 0.236  | 0.349 | 0.497 | 0.251 | 0.937  | CDS | GI:188595243 | BAG34218.1 |
| AP009380 | PGN_1700 | probable metal uptake system ABC transporter ATP-binding protein      |       | 1898759 | 1899373 | 615  | forward | 1.244 | 0.315  | 0.367 | 0.511 | 0.350 | 0.902  | CDS | GI:188595244 | BAG34219.1 |
| AP009380 | PGN_1701 | conserved hypothetical protein                                        |       | 1899336 | 1899875 | 540  | forward | 1.195 | 0.257  | 0.279 | 0.427 | 0.238 | 1.082  | CDS | GI:188595245 | BAG34220.1 |
| AP009380 | PGN_1702 | protein-export membrane protein SecD/SecE                             |       | 1900113 | 1903058 | 2946 | forward | 1.214 | 0.279  | 0.208 | 0.348 | 0.222 | 1.260  | CDS | GI:188595246 | BAG34221.1 |
| AP009380 | PGN_1703 | putative ribonuclease III                                             |       | 1903185 | 1903970 | 786  | reverse | 1.088 | 0.122  | 0.747 | 0.825 | 0.379 | 0.322  | CDS | GI:188595247 | BAG34222.1 |
| AP009380 | PGN_1704 | beta-ketoacyl-acyl-carrier-protein synthase II                        |       | 1903982 | 1905238 | 1257 | reverse | 1.062 | 0.087  | 0.786 | 0.857 | 0.322 | 0.272  | CDS | GI:188595248 | BAG34223.1 |
| AP009380 | PGN_1705 | putative acyl carrier protein                                         |       | 1905248 | 1905484 | 237  | reverse | 1.010 | 0.014  | 0.962 | 0.972 | 0.287 | 0.048  | CDS | GI:188595249 | BAG34224.1 |
| AP009380 | PGN_1706 | probable phosphoribosylglycinamide formyltransferase                  |       | 1905653 | 1906234 | 582  | forward | 0.914 | -0.130 | 0.600 | 0.715 | 0.247 | -0.525 | CDS | GI:188595250 | BAG34225.1 |
| AP009380 | PGN_1707 | conserved hypothetical protein                                        |       | 1906231 | 1907271 | 1041 | forward | 1.309 | 0.389  | 0.207 | 0.348 | 0.308 | 1.261  | CDS | GI:188595251 | BAG34226.1 |
| AP009380 | PGN_1708 | magnesium chelatase subunit ChlI                                      |       | 1907297 | 1908838 | 1542 | forward | 1.738 | 0.798  | 0.009 | 0.039 | 0.224 | 2.624  | CDS | GI:188595252 | BAG34227.1 |
| AP009380 | PGN_1709 | conserved hypothetical protein                                        |       | 1908843 | 1909166 | 324  | forward | 1.556 | 0.638  | 0.004 | 0.023 | 0.223 | 2.863  | CDS | GI:188595253 | BAG34228.1 |
| AP009380 | PGN_1710 | conserved hypothetical protein                                        |       | 1909520 | 1910197 | 678  | forward | 0.881 | -0.183 | 0.463 | 0.602 | 0.250 | -0.734 | CDS | GI:188595254 | BAG34229.1 |
| AP009380 | PGN_1711 | phenylalanyl-tRNA synthetase alpha subunit                            |       | 1910274 | 1911296 | 1023 | reverse | 1.535 | 0.619  | 0.015 | 0.056 | 0.254 | 2.439  | CDS | GI:188595255 | BAG34230.1 |
| AP009380 | PGN_1712 | putative endonuclease III                                             |       | 1911315 | 1911989 | 675  | forward | 1.340 | 0.422  | 0.072 | 0.166 | 0.234 | 1.801  | CDS | GI:188595256 | BAG34231.1 |
| AP009380 | PGN_1713 | conserved hypothetical protein                                        |       | 1912051 | 1913388 | 1338 | forward | 1.077 | 0.107  | 0.661 | 0.763 | 0.243 | 0.438  | CDS | GI:188595257 | BAG34232.1 |
| AP009380 | PGN_1714 | transcription-repair coupling factor                                  |       | 1913365 | 1916733 | 3369 | reverse | 1.045 | 0.064  | 0.780 | 0.853 | 0.230 | 0.279  | CDS | GI:188595258 | BAG34233.1 |
| AP009380 | PGN_1715 | putative chaperone protein GrpE                                       | grpE  | 1917128 | 1917712 | 585  | forward | 0.580 | -0.785 | 0.081 | 0.182 | 0.450 | -1.746 | CDS | GI:188595259 | BAG34234.1 |
| AP009380 | PGN_1716 | chaperone protein DnaJ                                                | dnaJ  | 1917755 | 1918906 | 1152 | forward | 0.585 | -0.772 | 0.095 | 0.205 | 0.462 | -1.671 | CDS | GI:188595260 | BAG34235.1 |
| AP009380 | PGN_1717 | conserved hypothetical protein                                        |       | 1918992 | 1919309 | 318  | forward | 0.603 | -0.731 | 0.090 | 0.198 | 0.431 | -1.695 | CDS | GI:188595261 | BAG34236.1 |
| AP009380 | PGN_1718 | probable UDP-2,3-diacetylglucosamine hydrolase                        |       | 1919338 | 1920126 | 789  | forward | 0.688 | -0.539 | 0.169 | 0.302 | 0.392 | -1.375 | CDS | GI:188595262 | BAG34237.1 |
| AP009380 | PGN_1719 | conserved hypothetical protein with appr-1-p processing enzyme domain |       | 1920208 | 1920702 | 495  | forward | 0.662 | -0.595 | 0.118 | 0.236 | 0.380 | -1.565 | CDS | GI:188595263 | BAG34238.1 |
| AP009380 | PGN_1720 | hypothetical protein                                                  |       | 1920714 | 1920827 | 114  | forward | 0.665 | -0.589 | 0.091 | 0.199 | 0.348 | -1.692 | CDS | GI:188595264 | BAG34239.1 |
| AP009380 | PGN_1721 | 8-amino-7-oxononanoate synthase                                       |       | 1921069 | 1922256 | 1188 | forward | 1.364 | 0.447  | 0.076 | 0.173 | 0.252 | 1.773  | CDS | GI:188595265 | BAG34240.1 |
| AP009380 | PGN_1722 | putative uridine kinase                                               |       | 1922311 | 1922934 | 624  | forward | 1.203 | 0.267  | 0.348 | 0.497 | 0.284 | 0.939  | CDS | GI:188595266 | BAG34241.1 |
| AP009380 | PGN_1723 | conserved hypothetical protein                                        |       | 1922976 | 1924163 | 1188 | forward | 1.728 | 0.789  | 0.043 | 0.116 | 0.390 | 2.024  | CDS | GI:188595267 | BAG34242.1 |
| AP009380 | PGN_1724 | conserved hypothetical protein                                        |       | 1924165 | 1924860 | 696  | forward | 1.361 | 0.445  | 0.156 | 0.285 | 0.313 | 1.419  | CDS | GI:188595268 | BAG34243.1 |
| AP009380 | PGN_1725 | probable polysaccharide deacetylase                                   |       | 1924848 | 1925642 | 795  | forward | 0.652 | -0.617 | 0.063 | 0.131 | 0.332 | -1.858 | CDS | GI:188595269 | BAG34244.1 |
| AP009380 | PGN_1726 | transposase in ISPg3                                                  |       | 1926046 | 1926948 | 903  | forward | 0.818 | -0.289 | 0.359 | 0.503 | 0.315 | -0.918 | CDS | GI:188595270 | BAG34245.1 |
| AP009380 | PGN_1727 | transposase in ISPg1                                                  |       | 1927072 | 1928133 | 1062 | forward | 0.620 | -0.689 | 0.132 | 0.256 | 0.458 | -1.505 | CDS | GI:188595271 | BAG34246.1 |
| AP009380 | PGN_1728 | lysine-specific cysteine proteinase Kgp                               | kgp   | 1928550 | 1933721 | 5172 | reverse | 2.023 | 1.017  | 0.027 | 0.085 | 0.461 | 2.208  | CDS | GI:188595272 | BAG34247.1 |
| AP009380 | PGN_1729 | probable acetyltransferase                                            |       | 1934169 | 1935161 | 993  | reverse | 0.753 | -0.410 | 0.136 | 0.260 | 0.275 | -1.490 | CDS | GI:188595273 | BAG34248.1 |
| AP009380 | PGN_1730 | conserved hypothetical protein                                        |       | 1935169 | 1936092 | 924  | reverse | 1.659 | 0.730  | 0.010 | 0.042 | 0.282 | 2.591  | CDS | GI:188595274 | BAG34249.1 |
| AP009380 | PGN_1731 | conserved hypothetical protein                                        |       | 1936187 | 1936300 | 114  | reverse | 0.952 | -0.070 | 0.852 | 0.905 | 0.377 | -0.187 | CDS | GI:188595275 | BAG34250.1 |
| AP009380 | PGN_1732 | hypothetical protein                                                  |       | 1936519 | 1936638 | 120  | reverse | 1.011 | 0.016  | 0.971 | 0.978 | 0.455 | 0.036  | CDS | GI:188595276 | BAG34251.1 |
| AP009380 | PGN_1733 | hemagglutinin protein HagA                                            | hagA  | 1936748 | 1944634 | 7887 | reverse | 0.520 | -0.943 | 0.011 | 0.046 | 0.371 | -2.542 | CDS | GI:188595277 | BAG34252.1 |
| AP009380 | PGN_1734 | nucleoside permease NupG                                              |       | 1945016 | 1946239 | 1224 | reverse | 0.641 | -0.641 | 0.010 | 0.043 | 0.249 | -2.578 | CDS | GI:188595278 | BAG34253.1 |
| AP009380 | PGN_1735 | conserved hypothetical protein                                        |       | 1946354 | 1947721 | 1368 | reverse | 0.763 | -0.391 | 0.196 | 0.334 | 0.302 | -1.293 | CDS | GI:188595279 | BAG34254.1 |
| AP009380 | PGN_1736 | putative glycogen synthase                                            |       | 1947824 | 1948639 | 816  | reverse | 0.716 | -0.482 | 0.061 | 0.147 | 0.257 | -1.874 | CDS | GI:188595280 | BAG34255.1 |
| AP009380 | PGN_1737 | ATP-dependent DNA helicase RecQ                                       | recQI | 1949266 | 1951389 | 2124 | forward | 0.837 | -0.256 | 0.421 | 0.558 | 0.318 | -0.805 | CDS | GI:188595281 | BAG34256.1 |
| AP009380 | PGN_1738 | putative long-chain-fatty-acid-CoA ligase                             |       | 1951864 | 1953537 | 1674 | forward | 1.691 | 0.758  | 0.044 | 0.119 | 0.377 | 2.010  | CDS | GI:188595282 | BAG34257.1 |
| AP009380 | PGN_1739 | conserved hypothetical protein                                        |       | 1953709 | 1953921 | 213  | forward | 0.876 | -0.191 | 0.473 | 0.610 | 0.266 | -0.718 | CDS | GI:188595283 | BAG34258.1 |
| AP009380 | PGN_1740 | putative RNA polymerase ECF-type sigma factor                         |       | 1954140 | 1954643 | 504  | reverse | 0.402 | -1.313 | 0.000 | 0.002 | 0.347 | -3.783 | CDS | GI:188595284 | BAG34259.1 |
| AP009380 | PGN_1741 | conserved hypothetical protein                                        |       | 1954780 | 1955199 | 420  | forward | 1.133 | 0.180  | 0.549 | 0.674 | 0.300 | 0.599  | CDS | GI:188595285 | BAG34260.1 |
| AP009380 | PGN_1742 | conserved hypothetical protein                                        |       | 1955174 | 1955335 | 162  | forward | 0.901 | -0.150 | 0.627 | 0.737 | 0.308 | -0.486 | CDS | GI:188595286 | BAG34261.1 |
| AP009380 | PGN_1743 | phosphopyruvate hydratase                                             |       | 1955415 | 1956692 | 1278 | forward | 1.334 | 0.416  | 0.022 | 0.073 | 0.181 | 2.294  | CDS | GI:188595287 | BAG34262.1 |
| AP009380 | PGN_1744 | conserved hypothetical                                                |       |         |         |      |         |       |        |       |       |       |        |     |              |            |

|          |          |                                                                 |         |         |      |         |       |        |       |       |       |        |     |              |            |
|----------|----------|-----------------------------------------------------------------|---------|---------|------|---------|-------|--------|-------|-------|-------|--------|-----|--------------|------------|
| AP009380 | PGN_1768 | putative DNA-binding response regulator/sensor histidine kinase | 1981953 | 1984838 | 2886 | reverse | 1.299 | 0.377  | 0.113 | 0.230 | 0.238 | 1.584  | CDS | GI:188595312 | BAG34287.1 |
| AP009380 | PGN_1769 | hypothetical protein                                            | 1984961 | 1985137 | 177  | reverse | 0.662 | -0.596 | 0.038 | 0.106 | 0.287 | -2.077 | CDS | GI:188595313 | BAG34288.1 |
| AP009380 | PGN_1770 | conserved hypothetical protein                                  | 1985158 | 1985946 | 789  | forward | 0.801 | -0.320 | 0.195 | 0.334 | 0.247 | -1.296 | CDS | GI:188595314 | BAG34289.1 |
| AP009380 | PGN_1771 | DNA polymerase I                                                | 1986093 | 1988873 | 2781 | reverse | 0.987 | -0.018 | 0.946 | 0.962 | 0.270 | -0.068 | CDS | GI:188595315 | BAG34290.1 |
| AP009380 | PGN_1772 | 1,4-alpha-glucan branching enzyme                               | 1988924 | 1990930 | 2007 | reverse | 0.926 | -0.110 | 0.679 | 0.778 | 0.266 | -0.414 | CDS | GI:188595316 | BAG34291.1 |
| AP009380 | PGN_1773 | sodium/hydrogen antiporter                                      | 1990927 | 1993230 | 2304 | reverse | 0.830 | -0.269 | 0.359 | 0.503 | 0.293 | -0.917 | CDS | GI:188595317 | BAG34292.1 |
| AP009380 | PGN_1774 | conserved hypothetical protein                                  | 1993781 | 1993996 | 216  | forward | 1.181 | 0.240  | 0.399 | 0.540 | 0.284 | 0.843  | CDS | GI:188595318 | BAG34293.1 |
| AP009380 | PGN_1775 | conserved hypothetical protein                                  | 1993993 | 1995477 | 1485 | forward | 1.093 | 0.128  | 0.644 | 0.750 | 0.276 | 0.463  | CDS | GI:188595319 | BAG34294.1 |
| AP009380 | PGN_1776 | peptidyl-dipeptidase                                            | 1995494 | 1997530 | 2037 | forward | 2.395 | 1.260  | 0.002 | 0.015 | 0.412 | 3.055  | CDS | GI:188595320 | BAG34295.1 |
| AP009380 | PGN_1777 | bleomycin hydrolase                                             | 1997647 | 1998918 | 1272 | reverse | 1.937 | 0.954  | 0.027 | 0.084 | 0.430 | 2.216  | CDS | GI:188595321 | BAG34296.1 |
| AP009380 | PGN_1778 | hypothetical protein                                            | 1999341 | 1999436 | 96   | reverse | 0.531 | -0.914 | 0.034 | 0.100 | 0.432 | -2.115 | CDS | GI:188595322 | BAG34297.1 |
| AP009380 | PGN_1779 | conserved hypothetical protein                                  | 2000160 | 2000297 | 138  | forward | 1.260 | 0.334  | 0.523 | 0.652 | 0.522 | 0.639  | CDS | GI:188595323 | BAG34298.1 |
| AP009380 | PGN_1780 | putative YjgF-like protein                                      | 2000300 | 2000680 | 381  | reverse | 2.245 | 1.167  | 0.003 | 0.017 | 0.390 | 2.992  | CDS | GI:188595324 | BAG34299.1 |
| AP009380 | PGN_1781 | putative tRNA:rRNA methyltransferase                            | 2000706 | 2001455 | 750  | reverse | 1.799 | 0.847  | 0.013 | 0.051 | 0.341 | 2.488  | CDS | GI:188595325 | BAG34300.1 |
| AP009380 | PGN_1782 | DNA repair protein RecN                                         | 2001452 | 2003107 | 1656 | reverse | 1.548 | 0.631  | 0.024 | 0.077 | 0.279 | 2.259  | CDS | GI:188595326 | BAG34301.1 |
| AP009380 | PGN_1783 | conserved hypothetical protein                                  | 2003122 | 2004030 | 909  | reverse | 1.294 | 0.371  | 0.042 | 0.115 | 0.183 | 2.033  | CDS | GI:188595327 | BAG34302.1 |
| AP009380 | PGN_1784 | DNA/pantothenate metabolism flavoprotein                        | 2004027 | 2005241 | 1215 | reverse | 1.333 | 0.414  | 0.089 | 0.196 | 0.243 | 1.701  | CDS | GI:188595328 | BAG34303.1 |
| AP009380 | PGN_1785 | putative DNA polymerase III epsilon chain                       | 2005267 | 2006046 | 780  | reverse | 1.105 | 0.144  | 0.587 | 0.705 | 0.265 | 0.543  | CDS | GI:188595329 | BAG34304.1 |
| AP009380 | PGN_1786 | putative DNA polymerase III beta chain                          | 2006059 | 2007192 | 1134 | reverse | 1.104 | 0.143  | 0.612 | 0.725 | 0.281 | 0.507  | CDS | GI:188595330 | BAG34305.1 |
| AP009380 | PGN_1787 | probable 5-formyltetrahydrofolate cyclo-ligase                  | 2007398 | 2007901 | 504  | reverse | 1.352 | 0.435  | 0.125 | 0.245 | 0.284 | 1.535  | CDS | GI:188595331 | BAG34306.1 |
| AP009380 | PGN_1788 | carboxyl-terminal processing protease                           | 2009715 | 2009549 | 1635 | reverse | 1.872 | 0.905  | 0.026 | 0.083 | 0.407 | 2.222  | CDS | GI:188595332 | BAG34307.1 |
| AP009380 | PGN_1789 | putative deoxycytidylate deaminase                              | 2009557 | 2010012 | 456  | reverse | 1.375 | 0.460  | 0.248 | 0.393 | 0.398 | 1.156  | CDS | GI:188595333 | BAG34308.1 |
| AP009380 | PGN_1790 | conserved hypothetical protein                                  | 2010093 | 2010446 | 354  | reverse | 2.103 | 1.072  | 0.000 | 0.001 | 0.268 | 4.006  | CDS | GI:188595334 | BAG34309.1 |
| AP009380 | PGN_1791 | putative flavodoxin                                             | 2010611 | 2011108 | 498  | reverse | 1.116 | 0.159  | 0.425 | 0.562 | 0.199 | 0.799  | CDS | GI:188595335 | BAG34310.1 |
| AP009380 | PGN_1792 | glycerate kinase                                                | 2011247 | 2012407 | 1161 | reverse | 0.873 | -0.196 | 0.488 | 0.625 | 0.283 | -0.693 | CDS | GI:188595336 | BAG34311.1 |
| AP009380 | PGN_1793 | conserved hypothetical protein                                  | 2012647 | 2013831 | 1185 | reverse | 0.689 | -0.538 | 0.022 | 0.073 | 0.234 | -2.295 | CDS | GI:188595337 | BAG34312.1 |
| AP009380 | PGN_1794 | conserved hypothetical protein                                  | 2013960 | 2014130 | 171  | reverse | 0.626 | -0.676 | 0.013 | 0.051 | 0.271 | -2.489 | CDS | GI:188595338 | BAG34313.1 |
| AP009380 | PGN_1795 | conserved hypothetical protein                                  | 2014143 | 2014589 | 447  | reverse | 0.621 | -0.687 | 0.022 | 0.073 | 0.299 | -2.294 | CDS | GI:188595339 | BAG34314.1 |
| AP009380 | PGN_1796 | conserved hypothetical protein                                  | 2014582 | 2017959 | 3378 | reverse | 0.684 | -0.547 | 0.060 | 0.146 | 0.291 | -1.878 | CDS | GI:188595340 | BAG34315.1 |
| AP009380 | PGN_1797 | conserved hypothetical protein                                  | 2018735 | 2019256 | 522  | reverse | 0.904 | -0.145 | 0.623 | 0.734 | 0.296 | -0.491 | CDS | GI:188595341 | BAG34316.1 |
| AP009380 | PGN_1798 | conserved hypothetical protein                                  | 2019507 | 2020172 | 666  | reverse | 0.736 | -0.441 | 0.118 | 0.237 | 0.283 | -1.562 | CDS | GI:188595342 | BAG34317.1 |
| AP009380 | PGN_1799 | hypothetical protein                                            | 2020208 | 2020381 | 174  | reverse | 0.731 | -0.452 | 0.289 | 0.437 | 0.427 | -1.060 | CDS | GI:188595343 | BAG34318.1 |
| AP009380 | PGN_1800 | uroacinate hydratase                                            | 2020569 | 2022548 | 1980 | reverse | 1.639 | 0.713  | 0.004 | 0.025 | 0.251 | 2.842  | CDS | GI:188595344 | BAG34319.1 |
| AP009380 | PGN_1801 | conserved hypothetical protein                                  | 2022889 | 2023296 | 408  | reverse | 0.987 | -0.019 | 0.944 | 0.962 | 0.268 | -0.071 | CDS | GI:188595345 | BAG34320.1 |
| AP009380 | PGN_1802 | hemolysin                                                       | 2023283 | 2024257 | 975  | reverse | 1.166 | 0.222  | 0.347 | 0.496 | 0.236 | 0.941  | CDS | GI:188595346 | BAG34321.1 |
| AP009380 | PGN_1803 | conserved hypothetical protein                                  | 2024269 | 2025096 | 828  | reverse | 1.491 | 0.576  | 0.076 | 0.173 | 0.325 | 1.774  | CDS | GI:188595347 | BAG34322.1 |
| AP009380 | PGN_1804 | Na <sup>+</sup> /H <sup>+</sup> antiporter                      | 2025125 | 2026483 | 1359 | reverse | 0.704 | -0.506 | 0.123 | 0.243 | 0.328 | -1.541 | CDS | GI:188595348 | BAG34323.1 |
| AP009380 | PGN_1805 | cysteinyI-tRNA synthetase                                       | 2026626 | 2028086 | 1461 | forward | 0.952 | -0.071 | 0.803 | 0.868 | 0.286 | -0.250 | CDS | GI:188595349 | BAG34324.1 |
| AP009380 | PGN_1806 | conserved hypothetical protein                                  | 2028137 | 2029156 | 1020 | forward | 0.838 | -0.255 | 0.360 | 0.505 | 0.278 | -0.914 | CDS | GI:188595350 | BAG34325.1 |
| AP009380 | PGN_1807 | putative glycosyltransferase                                    | 2029167 | 2030177 | 1011 | forward | 0.917 | -0.125 | 0.570 | 0.690 | 0.220 | -0.568 | CDS | GI:188595351 | BAG34326.1 |
| AP009380 | PGN_1808 | conserved hypothetical protein                                  | 2030210 | 2031652 | 1443 | forward | 1.058 | 0.081  | 0.643 | 0.750 | 0.175 | 0.464  | CDS | GI:188595352 | BAG34327.1 |
| AP009380 | PGN_1809 | hypothetical protein                                            | 2031685 | 2031780 | 96   | forward | 1.084 | 0.117  | 0.710 | 0.801 | 0.314 | 0.372  | CDS | GI:188595353 | BAG34328.1 |
| AP009380 | PGN_1810 | hypothetical protein                                            | 2032072 | 2032338 | 267  | forward | 2.203 | 1.140  | 0.000 | 0.002 | 0.296 | 3.857  | CDS | GI:188595354 | BAG34329.1 |
| AP009380 | PGN_1811 | putative alpha-L-fucosidase                                     | 2032472 | 2034565 | 2094 | reverse | 1.439 | 0.525  | 0.006 | 0.029 | 0.189 | 2.770  | CDS | GI:188595355 | BAG34330.1 |
| AP009380 | PGN_1812 | polyphosphate kinase                                            | 2034569 | 2036656 | 2088 | reverse | 1.057 | 0.080  | 0.770 | 0.845 | 0.275 | 0.292  | CDS | GI:188595356 | BAG34331.1 |
| AP009380 | PGN_1813 | GTP-binding protein                                             | 2036819 | 2038039 | 1221 | reverse | 0.704 | -0.505 | 0.031 | 0.094 | 0.235 | -2.155 | CDS | GI:188595357 | BAG34332.1 |
| AP009380 | PGN_1814 | conserved hypothetical protein                                  | 2038118 | 2039152 | 1035 | forward | 1.277 | 0.353  | 0.156 | 0.285 | 0.249 | 1.418  | CDS | GI:188595358 | BAG34333.1 |
| AP009380 | PGN_1815 | conserved hypothetical protein                                  | 2039149 | 2039763 | 615  | forward | 2.038 | 1.027  | 0.001 | 0.005 | 0.298 | 3.449  | CDS | GI:188595359 | BAG34334.1 |
| AP009380 | PGN_1816 | conserved hypothetical protein                                  | 2039904 | 2040566 | 663  | forward | 1.250 | 0.322  | 0.257 | 0.403 | 0.284 | 1.135  | CDS | GI:188595360 | BAG34335.1 |
| AP009380 | PGN_1817 | conserved hypothetical protein                                  | 2041168 | 2041605 | 438  | forward | 1.019 | 0.027  | 0.919 | 0.950 | 0.267 | 0.101  | CDS | GI:188595361 | BAG34336.1 |
| AP009380 | PGN_1818 | conserved hypothetical protein                                  | 2041638 | 2047895 | 6258 | forward | 1.469 | 0.555  | 0.152 | 0.280 | 0.388 | 1.431  | CDS | GI:188595362 | BAG34337.1 |
| AP009380 | PGN_1819 | hypothetical protein                                            | 2047889 | 2048422 | 534  | forward | 1.509 | 0.594  | 0.173 | 0.307 | 0.436 | 1.362  | CDS | GI:188595363 | BAG34338.1 |
| AP009380 | PGN_1820 | conserved hypothetical protein                                  | 2048526 | 2048987 | 462  | forward | 1.389 | 0.474  | 0.295 | 0.443 | 0.432 | 1.048  | CDS | GI:188595364 | BAG34339.1 |
| AP009380 | PGN_1821 | conserved hypothetical protein                                  | 2049047 | 2050444 | 1398 | forward | 1.460 | 0.546  | 0.124 | 0.245 | 0.355 | 1.537  | CDS | GI:188595365 | BAG34340.1 |
| AP009380 | PGN_1822 | hypothetical protein                                            | 2051009 | 2051110 | 102  | reverse | 2.005 | 1.004  | 0.037 | 0.105 | 0.482 | 2.085  | CDS | GI:188595366 | BAG34341.1 |
| AP009380 | PGN_1823 | conserved hypothetical protein                                  | 2051588 | 2052361 | 774  | forward | 2.843 | 1.507  | 0.000 | 0.003 | 0.416 | 3.625  | CDS | GI:188595367 | BAG34342.1 |
| AP009380 | PGN_1824 | hypothetical protein                                            | 2052465 | 2052776 | 312  | forward | 2.087 | 1.062  | 0.006 | 0.032 | 0.389 | 2.728  | CDS | GI:188595368 | BAG34343.1 |
| AP009380 | PGN_1825 | hypothetical protein                                            | 2052907 | 2054094 | 1188 | forward | 0.447 | -1.161 | 0.013 | 0.052 | 0.468 | -2.480 | CDS | GI:188595369 | BAG34344.1 |
| AP009380 | PGN_1826 | conserved hypothetical protein                                  | 2054091 | 2054789 | 699  | forward | 0.859 | -0.220 | 0.548 | 0.674 | 0.365 | -0.601 | CDS | GI:188595370 | BAG34345.1 |
| AP009380 | PGN_1827 | S-adenosylmethionine synthase                                   | 2055213 | 2056502 | 1290 | forward | 0.574 | -0.800 | 0.088 | 0.196 | 0.469 | -1.704 | CDS | GI:188595371 | BAG34346.1 |
| AP009380 | PGN_1828 | conserved hypothetical protein                                  | 2056631 | 2057350 | 720  | reverse | 0.549 | -0.866 | 0.006 | 0.032 | 0.318 | -2.722 | CDS | GI:188595372 | BAG34347.1 |
| AP009380 | PGN_1829 | probable nicotinamide mononucleotide transporter                | 2057305 | 2057886 | 582  | reverse | 0.691 | -0.533 | 0.122 | 0.242 | 0.344 | -1.547 | CDS | GI:188595373 | BAG34348.1 |
| AP009380 | PGN_1830 | putative TonB-dependent receptor                                | 2057918 | 2060302 | 2385 | reverse | 0.810 | -0.304 | 0.115 | 0.232 | 0.193 | -1.577 | CDS | GI:188595374 | BAG34349.1 |
| AP009380 | PGN_1831 | putative GTPase                                                 | 2060378 | 2061325 | 948  | reverse | 1.081 | 0.112  | 0.709 | 0.801 | 0.300 | 0.373  | CDS | GI:188595375 | BAG34350.1 |
| AP009380 | PGN_1832 | putative ribosome recycling factor                              | 2061410 | 2061970 | 561  | reverse | 1     |        |       |       |       |        |     |              |            |

|          |          |                                                       |      |         |         |              |       |        |       |       |       |        |     |              |            |
|----------|----------|-------------------------------------------------------|------|---------|---------|--------------|-------|--------|-------|-------|-------|--------|-----|--------------|------------|
| AP009380 | PGN_1855 | 30S ribosomal protein S14                             | rpsN | 2077646 | 2077915 | 270 reverse  | 2.496 | 1.319  | 0.000 | 0.000 | 0.225 | 5.864  | CDS | GI:188595399 | BAG34374.1 |
| AP009380 | PGN_1856 | 50S ribosomal protein L5                              | rplE | 2077917 | 2078477 | 561 reverse  | 2.820 | 1.496  | 0.000 | 0.000 | 0.254 | 5.880  | CDS | GI:188595400 | BAG34375.1 |
| AP009380 | PGN_1857 | 50S ribosomal protein L24                             | rplX | 2078477 | 2078797 | 321 reverse  | 2.795 | 1.483  | 0.000 | 0.000 | 0.237 | 6.246  | CDS | GI:188595401 | BAG34376.1 |
| AP009380 | PGN_1858 | 50S ribosomal protein L14                             | rplN | 2078820 | 2079185 | 366 reverse  | 3.534 | 1.821  | 0.000 | 0.000 | 0.317 | 5.750  | CDS | GI:188595402 | BAG34377.1 |
| AP009380 | PGN_1859 | 30S ribosomal protein S17                             | rpsQ | 2079187 | 2079441 | 255 reverse  | 3.305 | 1.725  | 0.000 | 0.000 | 0.288 | 5.994  | CDS | GI:188595403 | BAG34378.1 |
| AP009380 | PGN_1860 | 50S ribosomal protein L29                             | rpmC | 2079455 | 2079649 | 195 reverse  | 3.488 | 1.802  | 0.000 | 0.000 | 0.296 | 6.089  | CDS | GI:188595404 | BAG34379.1 |
| AP009380 | PGN_1861 | 50S ribosomal protein L16                             | rplP | 2079655 | 2080089 | 435 reverse  | 3.264 | 1.707  | 0.000 | 0.000 | 0.311 | 5.492  | CDS | GI:188595405 | BAG34380.1 |
| AP009380 | PGN_1862 | 30S ribosomal protein S3                              | rpsC | 2080110 | 2080850 | 741 reverse  | 2.966 | 1.569  | 0.000 | 0.000 | 0.270 | 5.800  | CDS | GI:188595406 | BAG34381.1 |
| AP009380 | PGN_1863 | 50S ribosomal protein L22                             | rplV | 2080857 | 2081261 | 405 reverse  | 3.043 | 1.605  | 0.000 | 0.000 | 0.320 | 5.022  | CDS | GI:188595407 | BAG34382.1 |
| AP009380 | PGN_1864 | 30S ribosomal protein S19                             | rpsS | 2081316 | 2081585 | 270 reverse  | 3.062 | 1.615  | 0.000 | 0.000 | 0.261 | 6.181  | CDS | GI:188595408 | BAG34383.1 |
| AP009380 | PGN_1865 | 50S ribosomal protein L2                              | rplB | 2081608 | 2082432 | 825 reverse  | 2.565 | 1.359  | 0.000 | 0.000 | 0.241 | 5.642  | CDS | GI:188595409 | BAG34384.1 |
| AP009380 | PGN_1866 | 50S ribosomal protein L23                             | rplW | 2082439 | 2082732 | 294 reverse  | 2.682 | 1.423  | 0.000 | 0.000 | 0.243 | 5.851  | CDS | GI:188595410 | BAG34385.1 |
| AP009380 | PGN_1867 | 50S ribosomal protein L4                              | rplD | 2082747 | 2083376 | 630 reverse  | 3.167 | 1.663  | 0.000 | 0.000 | 0.262 | 6.356  | CDS | GI:188595411 | BAG34386.1 |
| AP009380 | PGN_1868 | 50S ribosomal protein L3                              | rplC | 2083376 | 2083993 | 618 reverse  | 3.310 | 1.727  | 0.000 | 0.000 | 0.258 | 6.693  | CDS | GI:188595412 | BAG34387.1 |
| AP009380 | PGN_1869 | 30S ribosomal protein S10                             | rpsJ | 2084016 | 2084321 | 306 reverse  | 3.320 | 1.731  | 0.000 | 0.000 | 0.251 | 6.899  | CDS | GI:188595413 | BAG34388.1 |
| AP009380 | PGN_1870 | translation elongation factor G                       |      | 2084337 | 2086460 | 2124 reverse | 2.208 | 1.143  | 0.000 | 0.000 | 0.210 | 5.446  | CDS | GI:188595414 | BAG34389.1 |
| AP009380 | PGN_1871 | 30S ribosomal protein S7                              | rpsG | 2086473 | 2086949 | 477 reverse  | 2.407 | 1.267  | 0.000 | 0.000 | 0.221 | 5.740  | CDS | GI:188595415 | BAG34390.1 |
| AP009380 | PGN_1872 | 30S ribosomal protein S12                             | rpsL | 2087186 | 2087590 | 405 reverse  | 2.216 | 1.148  | 0.000 | 0.000 | 0.190 | 6.036  | CDS | GI:188595416 | BAG34391.1 |
| AP009380 | PGN_1873 | conserved hypothetical protein                        |      | 2088187 | 2089473 | 1287 reverse | 2.144 | 1.100  | 0.000 | 0.000 | 0.262 | 4.206  | CDS | GI:188595417 | BAG34392.1 |
| AP009380 | PGN_1874 | putative 3-phosphoshikimate 1-carboxyvinyltransferase |      | 2089679 | 2090938 | 1260 forward | 2.132 | 1.092  | 0.000 | 0.000 | 0.307 | 3.563  | CDS | GI:188595418 | BAG34393.1 |
| AP009380 | PGN_1875 | conserved hypothetical protein                        |      | 2090960 | 2091403 | 444 forward  | 2.130 | 1.091  | 0.002 | 0.015 | 0.358 | 3.046  | CDS | GI:188595419 | BAG34394.1 |
| AP009380 | PGN_1876 | putative ABC transporter membrane protein             |      | 2091396 | 2092202 | 807 forward  | 1.873 | 0.906  | 0.007 | 0.034 | 0.337 | 2.687  | CDS | GI:188595420 | BAG34395.1 |
| AP009380 | PGN_1877 | Por secretion system protein porW/sprE                | porW | 2092195 | 2095677 | 3483 forward | 2.561 | 1.357  | 0.000 | 0.000 | 0.270 | 5.022  | CDS | GI:188595421 | BAG34396.1 |
| AP009380 | PGN_1878 | conserved hypothetical protein                        |      | 2095702 | 2097123 | 1422 forward | 2.780 | 1.475  | 0.000 | 0.000 | 0.310 | 4.764  | CDS | GI:188595422 | BAG34397.1 |
| AP009380 | PGN_1879 | hypothetical protein                                  |      | 2097131 | 2097292 | 162 forward  | 1.129 | 0.175  | 0.553 | 0.676 | 0.294 | 0.593  | CDS | GI:188595423 | BAG34398.1 |
| AP009380 | PGN_1880 | malate dehydrogenase                                  |      | 2097400 | 2098404 | 1005 reverse | 1.440 | 0.526  | 0.092 | 0.201 | 0.312 | 1.683  | CDS | GI:188595424 | BAG34399.1 |
| AP009380 | PGN_1881 | conserved hypothetical protein                        |      | 2098575 | 2098853 | 279 forward  | 1.870 | 0.903  | 0.007 | 0.032 | 0.333 | 2.714  | CDS | GI:188595425 | BAG34400.1 |
| AP009380 | PGN_1882 | probable permease                                     |      | 2098866 | 2100026 | 1161 forward | 1.545 | 0.628  | 0.049 | 0.127 | 0.320 | 1.964  | CDS | GI:188595426 | BAG34401.1 |
| AP009380 | PGN_1883 | glutaminyl-tRNA synthetase                            |      | 2100406 | 2102106 | 1701 forward | 2.025 | 1.018  | 0.000 | 0.002 | 0.272 | 3.748  | CDS | GI:188595427 | BAG34402.1 |
| AP009380 | PGN_1884 | probable alkaline phosphatase                         |      | 2102134 | 2102781 | 648 forward  | 2.606 | 1.382  | 0.000 | 0.000 | 0.264 | 5.229  | CDS | GI:188595428 | BAG34403.1 |
| AP009380 | PGN_1885 | conserved hypothetical protein                        |      | 2102844 | 2103779 | 936 forward  | 2.708 | 1.437  | 0.000 | 0.000 | 0.188 | 7.653  | CDS | GI:188595429 | BAG34404.1 |
| AP009380 | PGN_1886 | putative NAD dependent epimerase                      |      | 2103783 | 2104802 | 1020 forward | 3.352 | 1.745  | 0.000 | 0.000 | 0.258 | 6.764  | CDS | GI:188595430 | BAG34405.1 |
| AP009380 | PGN_1887 | hypothetical protein                                  |      | 2105127 | 2105300 | 174 reverse  | 2.720 | 1.444  | 0.000 | 0.000 | 0.287 | 5.038  | CDS | GI:188595431 | BAG34406.1 |
| AP009380 | PGN_1888 | 4-hydroxybutyrate CoA-transferase                     |      | 2105523 | 2106818 | 1296 reverse | 2.139 | 1.097  | 0.000 | 0.000 | 0.216 | 5.067  | CDS | GI:188595432 | BAG34407.1 |
| AP009380 | PGN_1889 | conserved hypothetical protein                        |      | 2107357 | 2107506 | 150 reverse  | 2.056 | 1.040  | 0.001 | 0.006 | 0.308 | 3.376  | CDS | GI:188595433 | BAG34408.1 |
| AP009380 | PGN_1890 | 50S ribosomal protein L33                             | rpmG | 2107525 | 2107713 | 189 reverse  | 2.048 | 1.035  | 0.003 | 0.019 | 0.351 | 2.947  | CDS | GI:188595434 | BAG34409.1 |
| AP009380 | PGN_1891 | 50S ribosomal protein L28                             | rpmB | 2107733 | 2107972 | 240 reverse  | 1.922 | 0.943  | 0.001 | 0.007 | 0.282 | 3.338  | CDS | GI:188595435 | BAG34410.1 |
| AP009380 | PGN_1892 | conserved hypothetical protein                        |      | 2108195 | 2110462 | 2268 reverse | 2.902 | 1.537  | 0.000 | 0.000 | 0.242 | 6.363  | CDS | GI:188595436 | BAG34411.1 |
| AP009380 | PGN_1893 | hypothetical protein                                  |      | 2110659 | 2111270 | 612 reverse  | 3.047 | 1.607  | 0.000 | 0.000 | 0.298 | 5.387  | CDS | GI:188595437 | BAG34412.1 |
| AP009380 | PGN_1894 | conserved hypothetical protein                        |      | 2111397 | 2111549 | 153 reverse  | 0.890 | -0.168 | 0.705 | 0.798 | 0.444 | -0.378 | CDS | GI:188595438 | BAG34413.1 |
| AP009380 | PGN_1895 | conserved hypothetical protein                        |      | 2111697 | 2112272 | 576 forward  | 2.748 | 1.459  | 0.000 | 0.000 | 0.206 | 7.085  | CDS | GI:188595439 | BAG34414.1 |
| AP009380 | PGN_1896 | galactose-1-phosphate transferase                     | wbpA | 2112269 | 2113675 | 1407 forward | 3.117 | 1.640  | 0.000 | 0.000 | 0.299 | 5.477  | CDS | GI:188595440 | BAG34415.1 |
| AP009380 | PGN_1897 | putative transport related membrane protein           |      | 2113672 | 2115468 | 1797 forward | 3.141 | 1.651  | 0.000 | 0.000 | 0.315 | 5.243  | CDS | GI:188595441 | BAG34416.1 |
| AP009380 | PGN_1898 | probable transport protein                            |      | 2115429 | 2116427 | 999 reverse  | 2.340 | 1.227  | 0.000 | 0.000 | 0.273 | 4.498  | CDS | GI:188595442 | BAG34417.1 |
| AP009380 | PGN_1899 | conserved hypothetical protein                        |      | 2116530 | 2117414 | 885 forward  | 1.856 | 0.892  | 0.003 | 0.019 | 0.301 | 2.963  | CDS | GI:188595443 | BAG34418.1 |
| AP009380 | PGN_1900 | hypothetical protein                                  |      | 2117698 | 2117823 | 126 reverse  | 1.218 | 0.284  | 0.374 | 0.517 | 0.320 | 0.889  | CDS | GI:188595444 | BAG34419.1 |
| AP009380 | PGN_1901 | transposase in ISPg1                                  |      | 2118544 | 2119629 | 1086 reverse | 0.989 | -0.016 | 0.970 | 0.977 | 0.426 | -0.037 | CDS | GI:188595445 | BAG34420.1 |
| AP009380 | PGN_1902 | conserved hypothetical protein                        |      | 2119733 | 2120473 | 741 reverse  | 1.465 | 0.551  | 0.010 | 0.043 | 0.214 | 2.571  | CDS | GI:188595446 | BAG34421.1 |
| AP009380 | PGN_1903 | putative adenine-specific DNA methyltransferase       |      | 2120466 | 2121305 | 840 reverse  | 1.299 | 0.377  | 0.175 | 0.309 | 0.278 | 1.355  | CDS | GI:188595447 | BAG34422.1 |
| AP009380 | PGN_1904 | hemagglutinin protein HagB                            | hagB | 2121869 | 2122921 | 1053 forward | 3.126 | 1.644  | 0.000 | 0.000 | 0.198 | 8.287  | CDS | GI:188595448 | BAG34423.1 |
| AP009380 | PGN_1905 | conserved hypothetical protein                        |      | 2123712 | 2124776 | 1065 reverse | 0.771 | -0.375 | 0.175 | 0.308 | 0.276 | -1.357 | CDS | GI:188595449 | BAG34424.1 |
| AP009380 | PGN_1906 | hemagglutinin protein HagC                            | hagC | 2125016 | 2126068 | 1053 forward | 3.004 | 1.587  | 0.000 | 0.000 | 0.267 | 5.939  | CDS | GI:188595450 | BAG34425.1 |
| AP009380 | PGN_1907 | conserved hypothetical protein                        |      | 2126435 | 2128441 | 2007 reverse | 1.657 | 0.728  | 0.002 | 0.016 | 0.240 | 3.038  | CDS | GI:188595451 | BAG34426.1 |
| AP009380 | PGN_1908 | hypothetical protein                                  |      | 2128438 | 2128557 | 120 reverse  | 2.485 | 1.313  | 0.000 | 0.003 | 0.361 | 3.639  | CDS | GI:188595452 | BAG34427.1 |
| AP009380 | PGN_1909 | conserved hypothetical protein                        |      | 2128566 | 2128736 | 171 forward  | 1.893 | 0.921  | 0.006 | 0.029 | 0.334 | 2.760  | CDS | GI:188595453 | BAG34428.1 |
| AP009380 | PGN_1910 | conserved hypothetical protein                        |      | 2129007 | 2129177 | 171 reverse  | 0.704 | -0.506 | 0.140 | 0.263 | 0.343 | -1.475 | CDS | GI:188595454 | BAG34429.1 |
| AP009380 | PGN_1911 | transposase in ISPg3                                  |      | 2129806 | 2130708 | 903 forward  | 0.915 | -0.128 | 0.689 | 0.785 | 0.321 | -0.401 | CDS | GI:188595455 | BAG34430.1 |
| AP009380 | PGN_1912 | partial transposase in ISPg6                          |      | 2130789 | 2131301 | 513 forward  | 0.534 | -0.906 | 0.000 | 0.003 | 0.245 | -3.697 | CDS | GI:188595456 | BAG34431.1 |
| AP009380 | PGN_1913 | transposase in ISPg3                                  |      | 2131645 | 2132547 | 903 reverse  | 0.799 | -0.323 | 0.302 | 0.450 | 0.313 | -1.031 | CDS | GI:188595457 | BAG34432.1 |
| AP009380 | PGN_1914 | carboxyl-terminal processing protease                 |      | 2133134 | 2134843 | 1710 reverse | 1.048 | 0.068  | 0.804 | 0.869 | 0.273 | 0.248  | CDS | GI:188595458 | BAG34433.1 |
| AP009380 | PGN_1915 | conserved hypothetical protein                        |      | 2135093 | 2135470 | 378 forward  | 0.630 | -0.667 | 0.031 | 0.093 | 0.309 | -2.160 | CDS | GI:188595459 | BAG34434.1 |
| AP009380 | PGN_1916 | putative ABC transporter ATP-binding protein          |      | 2135640 | 2137346 | 1707 reverse | 0.736 | -0.443 | 0.029 | 0.088 | 0.202 | -2.190 | CDS | GI:188595460 | BAG34435.1 |
| AP009380 | PGN_1917 | putative ABC transporter ATP-binding protein          |      | 2137393 | 2139147 | 1755 reverse | 1.105 | 0.144  | 0.641 | 0.749 | 0.309 | 0.466  | CDS | GI:188595461 | BAG34436.1 |
| AP009380 | PGN_1918 | conserved hypothetical protein                        |      | 2139172 | 2140449 | 1278 reverse | 0.935 | -0.097 | 0.699 | 0.794 | 0.252 | -0.386 | CDS | GI:188595462 | BAG34437.1 |
| AP009380 |          |                                                       |      |         |         |              |       |        |       |       |       |        |     |              |            |

|          |           |                                                                    |      |         |         |              |       |        |       |       |       |        |      |              |            |
|----------|-----------|--------------------------------------------------------------------|------|---------|---------|--------------|-------|--------|-------|-------|-------|--------|------|--------------|------------|
| AP009380 | PGN_1942  | hypothetical protein                                               |      | 2165665 | 2165826 | 162 forward  | 0.967 | -0.049 | 0.849 | 0.903 | 0.257 | -0.191 | CDS  | GI:188595486 | BAG34461.1 |
| AP009380 | PGN_1943  | putative polyprenyl synthetase                                     |      | 2165935 | 2166909 | 975 reverse  | 1.009 | 0.012  | 0.956 | 0.969 | 0.219 | 0.056  | CDS  | GI:188595487 | BAG34462.1 |
| AP009380 | PGN_1944  | conserved hypothetical protein                                     |      | 2166967 | 2167605 | 639 reverse  | 1.224 | 0.291  | 0.362 | 0.506 | 0.320 | 0.911  | CDS  | GI:188595488 | BAG34463.1 |
| AP009380 | PGN_1945  | probable signal peptidase-related protein                          |      | 2167626 | 2168252 | 627 reverse  | 2.100 | 1.070  | 0.002 | 0.013 | 0.344 | 3.114  | CDS  | GI:188595489 | BAG34464.1 |
| AP009380 | PGN_1946  | signal peptidase I                                                 |      | 2168242 | 2169639 | 1398 reverse | 1.575 | 0.655  | 0.021 | 0.072 | 0.285 | 2.303  | CDS  | GI:188595490 | BAG34465.1 |
| AP009380 | PGN_1947  | putative dihydroadipicinate reductase                              | dapB | 2169655 | 2170371 | 717 reverse  | 1.590 | 0.669  | 0.004 | 0.022 | 0.231 | 2.896  | CDS  | GI:188595491 | BAG34466.1 |
| AP009380 | PGN_1948  | deoxyguanosinetriphosphate triphosphohydrolase                     |      | 2170432 | 2171775 | 1344 reverse | 0.920 | -0.120 | 0.653 | 0.759 | 0.267 | -0.450 | CDS  | GI:188595492 | BAG34467.1 |
| AP009380 | PGN_1949  | conserved hypothetical protein                                     |      | 2171919 | 2172911 | 993 reverse  | 1.731 | 0.792  | 0.018 | 0.065 | 0.335 | 2.360  | CDS  | GI:188595493 | BAG34468.1 |
| AP009380 | PGN_1950  | hypothetical protein                                               |      | 2173007 | 2173114 | 108 reverse  | 0.808 | -0.308 | 0.552 | 0.676 | 0.518 | -0.595 | CDS  | GI:188595494 | BAG34469.1 |
| AP009380 | PGN_1951  | conserved hypothetical protein                                     |      | 2173420 | 2173779 | 360 forward  | 1.131 | 0.178  | 0.568 | 0.689 | 0.311 | 0.571  | CDS  | GI:188595495 | BAG34470.1 |
| AP009380 | PGN_1952  | hypothetical protein                                               |      | 2173877 | 2173996 | 120 reverse  | 1.200 | 0.263  | 0.567 | 0.688 | 0.459 | 0.573  | CDS  | GI:188595496 | BAG34471.1 |
| AP009380 | PGN_1953  | TonB-dependent outer membrane receptor                             |      | 2174086 | 2176587 | 2502 forward | 1.411 | 0.496  | 0.126 | 0.247 | 0.324 | 1.530  | CDS  | GI:188595497 | BAG34472.1 |
| AP009380 | PGN_1954  | probable DNA repair protein RecD                                   |      | 2177157 | 2177894 | 738 forward  | 0.958 | -0.062 | 0.827 | 0.886 | 0.284 | -0.219 | CDS  | GI:188595498 | BAG34473.1 |
| AP009380 | PGN_1955  | phosphomannomutase                                                 |      | 2177967 | 2179715 | 1749 forward | 0.874 | -0.194 | 0.324 | 0.474 | 0.197 | -0.986 | CDS  | GI:188595499 | BAG34474.1 |
| AP009380 | PGN_1956  | hypothetical protein                                               |      | 2179819 | 2179920 | 102 reverse  | 1.019 | 0.028  | 0.923 | 0.952 | 0.287 | 0.096  | CDS  | GI:188595500 | BAG34475.1 |
| AP009380 | PGN_1957  | transposase in ISPg1                                               |      | 2180321 | 2181370 | 1050 reverse | 1.040 | 0.056  | 0.894 | 0.935 | 0.423 | 0.133  | CDS  | GI:188595501 | BAG34476.1 |
| AP009380 | PGN_1959  | CRISPR-associated protein Cas2                                     |      | 2189610 | 2189873 | 264 reverse  | 1.142 | 0.192  | 0.477 | 0.614 | 0.270 | 0.711  | CDS  | GI:188595502 | BAG34477.1 |
| AP009380 | PGN_1960  | CRISPR-associated protein Cas1                                     |      | 2189873 | 2190889 | 1017 reverse | 1.351 | 0.434  | 0.215 | 0.358 | 0.350 | 1.239  | CDS  | GI:188595503 | BAG34478.1 |
| AP009380 | PGN_1961  | CRISPR-associated protein Cas4                                     |      | 2190886 | 2191395 | 510 reverse  | 1.483 | 0.568  | 0.093 | 0.203 | 0.338 | 1.679  | CDS  | GI:188595504 | BAG34479.1 |
| AP009380 | PGN_1962  | conserved hypothetical protein                                     |      | 2191513 | 2192571 | 1059 reverse | 1.349 | 0.432  | 0.132 | 0.254 | 0.286 | 1.508  | CDS  | GI:188595505 | BAG34480.1 |
| AP009380 | PGN_1963  | conserved hypothetical protein                                     |      | 2192592 | 2193887 | 1296 reverse | 0.853 | -0.230 | 0.275 | 0.423 | 0.211 | -1.092 | CDS  | GI:188595506 | BAG34481.1 |
| AP009380 | PGN_1964  | probable CRISPR-associated helicase Cas3 core                      |      | 2193898 | 2196018 | 2121 reverse | 0.696 | -0.524 | 0.054 | 0.135 | 0.272 | -1.926 | CDS  | GI:188595507 | BAG34482.1 |
| AP009380 | PGN_1965  | hypothetical protein                                               |      | 2196035 | 2196622 | 588 reverse  | 0.733 | -0.449 | 0.197 | 0.336 | 0.348 | -1.289 | CDS  | GI:188595508 | BAG34483.1 |
| AP009380 | PGN_1966  | conserved hypothetical protein                                     |      | 2196629 | 2197294 | 666 reverse  | 0.645 | -0.633 | 0.053 | 0.132 | 0.327 | -1.939 | CDS  | GI:188595509 | BAG34484.1 |
| AP009380 | PGN_1967  | putative sulfatase                                                 |      | 2197942 | 2199864 | 1923 reverse | 1.454 | 0.540  | 0.131 | 0.253 | 0.357 | 1.512  | CDS  | GI:188595510 | BAG34485.1 |
| AP009380 | PGN_1968  | conserved hypothetical protein                                     |      | 2199877 | 2202420 | 2544 reverse | 1.127 | 0.173  | 0.508 | 0.639 | 0.262 | 0.662  | CDS  | GI:188595511 | BAG34486.1 |
| AP009380 | PGN_1969  | putative methionyl-tRNA formyltransferase                          |      | 2202585 | 2203556 | 972 reverse  | 0.990 | -0.015 | 0.950 | 0.966 | 0.238 | -0.063 | CDS  | GI:188595512 | BAG34487.1 |
| AP009380 | PGN_10046 | tRNA-Asp                                                           |      | 2203780 | 2203856 | 77 reverse   | 0.405 | -1.304 | 0.003 | 0.017 | 0.434 | -3.006 | tRNA |              |            |
| AP009380 | PGN_1970  | arginine-specific cysteine proteinase RgpA                         | rgpA | 2204102 | 2209213 | 5112 reverse | 2.277 | 1.187  | 0.001 | 0.010 | 0.370 | 3.210  | CDS  | GI:188595513 | BAG34488.1 |
| AP009380 | PGN_1971  | hypothetical protein                                               |      | 2209654 | 2209800 | 147 forward  | 0.606 | -0.723 | 0.151 | 0.279 | 0.503 | -1.436 | CDS  | GI:188595514 | BAG34489.1 |
| AP009380 | PGN_1972  | conserved hypothetical protein                                     |      | 2209781 | 2209903 | 123 forward  | 0.781 | -0.357 | 0.449 | 0.588 | 0.472 | -0.756 | CDS  | GI:188595515 | BAG34490.1 |
| AP009380 | PGN_1973  | probable phosphoglycerate mutase                                   |      | 2210019 | 2210537 | 519 forward  | 1.436 | 0.522  | 0.007 | 0.032 | 0.192 | 2.716  | CDS  | GI:188595516 | BAG34491.1 |
| AP009380 | PGN_1974  | conserved hypothetical protein                                     |      | 2210566 | 2211090 | 525 forward  | 1.066 | 0.093  | 0.655 | 0.759 | 0.208 | 0.446  | CDS  | GI:188595517 | BAG34492.1 |
| AP009380 | PGN_1975  | putative regulatory protein                                        |      | 2211099 | 2211608 | 510 forward  | 1.115 | 0.157  | 0.492 | 0.628 | 0.228 | 0.687  | CDS  | GI:188595518 | BAG34493.1 |
| AP009380 | PGN_1976  | conserved hypothetical protein                                     |      | 2211615 | 2214194 | 2580 forward | 1.072 | 0.101  | 0.720 | 0.808 | 0.281 | 0.359  | CDS  | GI:188595519 | BAG34494.1 |
| AP009380 | PGN_1977  | conserved hypothetical protein                                     |      | 2214763 | 2215398 | 636 forward  | 0.823 | -0.280 | 0.416 | 0.554 | 0.345 | -0.813 | CDS  | GI:188595520 | BAG34495.1 |
| AP009380 | PGN_1978  | conserved hypothetical protein                                     |      | 2215466 | 2215861 | 396 forward  | 0.389 | -1.360 | 0.001 | 0.010 | 0.422 | -3.222 | CDS  | GI:188595521 | BAG34496.1 |
| AP009380 | PGN_1979  | primosomal protein N                                               |      | 2215888 | 2218401 | 2514 reverse | 0.571 | -0.809 | 0.083 | 0.186 | 0.467 | -1.733 | CDS  | GI:188595522 | BAG34497.1 |
| AP009380 | PGN_1980  | putative NADPH-dependent glutamate synthase                        |      | 2218435 | 2219823 | 1389 reverse | 1.258 | 0.331  | 0.181 | 0.317 | 0.248 | 1.336  | CDS  | GI:188595523 | BAG34498.1 |
| AP009380 | PGN_1981  | conserved hypothetical protein                                     |      | 2219930 | 2220721 | 792 reverse  | 0.841 | -0.251 | 0.347 | 0.496 | 0.266 | -0.940 | CDS  | GI:188595524 | BAG34499.1 |
| AP009380 | PGN_1982  | putative tRNA guanine 1-methyltransferase                          |      | 2220923 | 2221600 | 678 forward  | 0.948 | -0.077 | 0.731 | 0.813 | 0.226 | -0.343 | CDS  | GI:188595525 | BAG34500.1 |
| AP009380 | PGN_1983  | putative ion transporter                                           |      | 2221632 | 2222543 | 912 forward  | 1.073 | 0.102  | 0.687 | 0.784 | 0.254 | 0.403  | CDS  | GI:188595526 | BAG34501.1 |
| AP009380 | PGN_1984  | hypothetical protein                                               |      | 2222612 | 2222833 | 222 reverse  | 1.072 | 0.100  | 0.715 | 0.805 | 0.274 | 0.365  | CDS  | GI:188595527 | BAG34502.1 |
| AP009380 | PGN_1985  | probable N-acetylmuramoyl-L-alanine amidase                        |      | 2222830 | 2223279 | 450 reverse  | 1.066 | 0.093  | 0.726 | 0.810 | 0.265 | 0.350  | CDS  | GI:188595528 | BAG34503.1 |
| AP009380 | PGN_1986  | DNA-binding protein, histone-like family                           |      | 2223419 | 2223895 | 477 reverse  | 1.313 | 0.393  | 0.194 | 0.333 | 0.303 | 1.298  | CDS  | GI:188595529 | BAG34504.1 |
| AP009380 | PGN_1987  | conserved hypothetical protein                                     |      | 2224256 | 2224987 | 732 reverse  | 1.379 | 0.464  | 0.039 | 0.109 | 0.225 | 2.062  | CDS  | GI:188595530 | BAG34505.1 |
| AP009380 | PGN_1988  | conserved hypothetical protein                                     |      | 2225115 | 2226632 | 1518 reverse | 0.990 | -0.015 | 0.959 | 0.970 | 0.286 | -0.051 | CDS  | GI:188595531 | BAG34506.1 |
| AP009380 | PGN_1989  | conserved hypothetical protein with NIF3 domain                    |      | 2227223 | 2228377 | 1155 forward | 0.779 | -0.360 | 0.129 | 0.251 | 0.237 | -1.520 | CDS  | GI:188595532 | BAG34507.1 |
| AP009380 | PGN_1990  | conserved hypothetical protein                                     |      | 2228395 | 2229150 | 756 forward  | 0.721 | -0.473 | 0.060 | 0.145 | 0.251 | -1.882 | CDS  | GI:188595533 | BAG34508.1 |
| AP009380 | PGN_1991  | putative cell-cycle protein                                        |      | 2229414 | 2230778 | 1365 forward | 1.321 | 0.402  | 0.247 | 0.392 | 0.347 | 1.157  | CDS  | GI:188595534 | BAG34509.1 |
| AP009380 | PGN_1992  | putative helicase                                                  |      | 2230773 | 2233058 | 2286 reverse | 0.597 | -0.745 | 0.000 | 0.001 | 0.187 | -3.980 | CDS  | GI:188595535 | BAG34510.1 |
| AP009380 | PGN_1993  | conserved hypothetical protein                                     |      | 2233149 | 2233529 | 381 reverse  | 0.561 | -0.833 | 0.001 | 0.010 | 0.260 | -3.200 | CDS  | GI:188595536 | BAG34511.1 |
| AP009380 | PGN_1994  | conserved hypothetical protein                                     |      | 2233542 | 2233919 | 378 reverse  | 0.403 | -1.310 | 0.000 | 0.000 | 0.302 | -4.335 | CDS  | GI:188595537 | BAG34512.1 |
| AP009380 | PGN_1995  | conserved hypothetical protein                                     |      | 2234175 | 2234450 | 276 reverse  | 0.684 | -0.548 | 0.144 | 0.268 | 0.375 | -1.462 | CDS  | GI:188595538 | BAG34513.1 |
| AP009380 | PGN_1996  | putative dihydroadipicinate synthase                               | dapA | 2234676 | 2235669 | 894 forward  | 0.737 | -0.440 | 0.041 | 0.112 | 0.215 | -2.046 | CDS  | GI:188595539 | BAG34514.1 |
| AP009380 | PGN_1997  | putative dethiobiotin synthase                                     |      | 2235598 | 2236251 | 654 forward  | 0.981 | -0.027 | 0.908 | 0.945 | 0.235 | -0.115 | CDS  | GI:188595540 | BAG34515.1 |
| AP009380 | PGN_1998  | immunoreactive 23 kDa antigen                                      |      | 2236357 | 2237028 | 672 reverse  | 0.804 | -0.315 | 0.220 | 0.363 | 0.256 | -1.227 | CDS  | GI:188595541 | BAG34516.1 |
| AP009380 | PGN_1999  | putative dihydroorotate dehydrogenase                              |      | 2237094 | 2238074 | 981 reverse  | 0.952 | -0.071 | 0.688 | 0.784 | 0.176 | -0.402 | CDS  | GI:188595542 | BAG34517.1 |
| AP009380 | PGN_10047 | tRNA-Lys                                                           |      | 2238677 | 2238752 | 76 reverse   | 0.379 | -1.400 | 0.000 | 0.003 | 0.390 | -3.593 | tRNA |              |            |
| AP009380 | PGN_2000  | hypothetical protein                                               |      | 2238976 | 2239449 | 474 reverse  | 0.905 | -0.144 | 0.716 | 0.806 | 0.395 | -0.364 | CDS  | GI:188595543 | BAG34518.1 |
| AP009380 | PGN_2001  | Por secretion system protein porY/putative sensor histidine kinase | porY | 2239546 | 2240733 | 1188 forward | 1.053 | 0.074  | 0.727 | 0.810 | 0.212 | 0.349  | CDS  | GI:188595544 | BAG34519.1 |
| AP009380 | PGN_2002  | conserved hypothetical protein                                     |      | 2241053 | 2241163 | 111 reverse  | 0.907 | -0.141 | 0.648 | 0.754 | 0.309 | -0.456 | CDS  | GI:188595545 | BAG34520.1 |
| AP009380 | PGN_2003  | single-stranded-DNA-specific exonuclease                           |      | 2241193 | 2242947 | 1755 forward | 1.062 | 0.086  | 0.731 | 0.813 | 0.251 | 0.344  | CDS  | GI:188595546 | BAG34521.1 |
| AP009380 | PGN_2004  | conserved hypothetical protein                                     |      | 2242944 | 2243999 | 1056 forward | 1.492 | 0.577  | 0.005 | 0.028 | 0.207 | 2.787  | CDS  | GI:188595547 | BAG34522.1 |
| AP009380 | PGN_2005  | conserved hypothetical protein                                     |      | 2244148 | 2245830 | 1683 forward | 0.773 | -0.371 | 0.118 | 0.236 | 0.237 | -1.565 |      |              |            |

|          |           |                                                       |         |         |              |       |        |       |       |       |        |      |              |            |
|----------|-----------|-------------------------------------------------------|---------|---------|--------------|-------|--------|-------|-------|-------|--------|------|--------------|------------|
| AP009380 | PGN_2028  | conserved hypothetical protein                        | 2270124 | 2272109 | 1986 forward | 1.307 | 0.386  | 0.064 | 0.152 | 0.208 | 1.853  | CDS  | GI:188595571 | BAG34546.1 |
| AP009380 | PGN_2029  | conserved hypothetical protein                        | 2272171 | 2273073 | 903 forward  | 1.208 | 0.272  | 0.164 | 0.294 | 0.196 | 1.393  | CDS  | GI:188595572 | BAG34547.1 |
| AP009380 | PGN_2030  | conserved hypothetical protein                        | 2273079 | 2273864 | 786 forward  | 1.188 | 0.249  | 0.345 | 0.494 | 0.263 | 0.944  | CDS  | GI:188595573 | BAG34548.1 |
| AP009380 | PGN_2031  | Lserine dehydratase                                   | 2273960 | 2275159 | 1200 forward | 0.817 | -0.292 | 0.211 | 0.352 | 0.233 | -1.252 | CDS  | GI:188595574 | BAG34549.1 |
| AP009380 | PGN_2032  | putative alpha-galactosidase                          | 2275159 | 2276604 | 1446 forward | 1.765 | 0.820  | 0.004 | 0.023 | 0.286 | 2.866  | CDS  | GI:188595575 | BAG34550.1 |
| AP009380 | PGN_2033  | ATP-dependent RNA helicase                            | 2276623 | 2278437 | 1815 reverse | 1.422 | 0.508  | 0.095 | 0.205 | 0.304 | 1.672  | CDS  | GI:188595576 | BAG34551.1 |
| AP009380 | PGN_2034  | probable sugar isomerase                              | 2278583 | 2279224 | 642 reverse  | 1.038 | 0.054  | 0.856 | 0.907 | 0.295 | 0.182  | CDS  | GI:188595577 | BAG34552.1 |
| AP009380 | PGN_2035  | putative peptidase                                    | 2279403 | 2280620 | 1218 forward | 0.584 | -0.776 | 0.001 | 0.010 | 0.242 | -3.214 | CDS  | GI:188595578 | BAG34553.1 |
| AP009380 | PGN_2036  | hypothetical protein                                  | 2280768 | 2280926 | 159 forward  | 0.837 | -0.257 | 0.506 | 0.638 | 0.386 | -0.665 | CDS  | GI:188595579 | BAG34554.1 |
| AP009380 | PGN_2037  | DNA-binding protein from starved cells Dps            | 2281649 | 2282128 | 480 forward  | 0.397 | -1.332 | 0.000 | 0.000 | 0.313 | -4.259 | CDS  | GI:188595580 | BAG34555.1 |
| AP009380 | PGN_2038  | conserved hypothetical protein                        | 2282257 | 2283531 | 1275 reverse | 2.048 | 1.035  | 0.001 | 0.007 | 0.307 | 3.373  | CDS  | GI:188595581 | BAG34556.1 |
| AP009380 | PGN_2039  | conserved hypothetical protein                        | 2283533 | 2284714 | 1182 reverse | 1.593 | 0.672  | 0.001 | 0.009 | 0.207 | 3.241  | CDS  | GI:188595582 | BAG34557.1 |
| AP009380 | PGN_2040  | conserved hypothetical protein                        | 2284717 | 2285712 | 996 reverse  | 1.187 | 0.248  | 0.285 | 0.433 | 0.232 | 1.069  | CDS  | GI:188595583 | BAG34558.1 |
| AP009380 | PGN_2041  | putative alkaline protease AprF                       | 2285761 | 2287266 | 1506 reverse | 1.348 | 0.431  | 0.029 | 0.088 | 0.197 | 2.189  | CDS  | GI:188595584 | BAG34559.1 |
| AP009380 | PGN_2042  | DNA mismatch repair protein MutS                      | 2288182 | 2290830 | 2649 reverse | 2.091 | 1.064  | 0.000 | 0.004 | 0.302 | 3.528  | CDS  | GI:188595585 | BAG34560.1 |
| AP009380 | PGN_2043  | conserved hypothetical protein                        | 2291150 | 2291842 | 693 reverse  | 1.268 | 0.343  | 0.195 | 0.334 | 0.264 | 1.295  | CDS  | GI:188595586 | BAG34561.1 |
| AP009380 | PGN_2044  | conserved hypothetical protein                        | 2291839 | 2291937 | 99 reverse   | 1.917 | 0.939  | 0.000 | 0.001 | 0.242 | 3.885  | CDS  | GI:188595587 | BAG34562.1 |
| AP009380 | PGN_2045  | phenylalanyl-tRNA synthetase beta subunit             | 2291921 | 2294380 | 2460 reverse | 1.507 | 0.591  | 0.004 | 0.023 | 0.206 | 2.869  | CDS  | GI:188595588 | BAG34563.1 |
| AP009380 | PGN_2046  | conserved hypothetical protein                        | 2294909 | 2295217 | 309 reverse  | 0.830 | -0.270 | 0.227 | 0.369 | 0.223 | -1.207 | CDS  | GI:188595589 | BAG34564.1 |
| AP009380 | PGN_2047  | conserved hypothetical protein                        | 2295216 | 2295584 | 369 forward  | 0.772 | -0.372 | 0.065 | 0.154 | 0.202 | -1.845 | CDS  | GI:188595590 | BAG34565.1 |
| AP009380 | PGN_10010 | 16S ribosomal RNA                                     | 2295553 | 2297027 | 1475 forward | 0.610 | -0.712 | 0.001 | 0.009 | 0.218 | -3.267 | rRNA |              |            |
| AP009380 | PGN_2048  | conserved hypothetical protein                        | 2297140 | 2297298 | 159 forward  | 0.983 | -0.025 | 0.912 | 0.947 | 0.223 | -0.110 | CDS  | GI:188595591 | BAG34566.1 |
| AP009380 | PGN_2049  | conserved hypothetical protein                        | 2297425 | 2297580 | 156 forward  | 1.104 | 0.143  | 0.496 | 0.632 | 0.210 | 0.681  | CDS  | GI:188595592 | BAG34567.1 |
| AP009380 | PGN_10048 | tRNA-Ile                                              | 2297590 | 2297663 | 74 forward   | 0.408 | -1.295 | 0.007 | 0.034 | 0.482 | -2.687 | rRNA |              |            |
| AP009380 | PGN_10049 | tRNA-Ala                                              | 2297665 | 2297741 | 77 forward   | 0.469 | -1.092 | 0.005 | 0.028 | 0.391 | -2.790 | rRNA |              |            |
| AP009380 | PGN_10011 | 23S ribosomal RNA                                     | 2297860 | 2300692 | 2833 forward | 0.478 | -1.065 | 0.000 | 0.001 | 0.255 | -4.180 | rRNA |              |            |
| AP009380 | PGN_10012 | 5S ribosomal RNA                                      | 2300839 | 2300946 | 108 forward  | 0.261 | -1.939 | 0.000 | 0.000 | 0.461 | -4.208 | rRNA |              |            |
| AP009380 | PGN_2050  | ATP-dependent helicase                                | 2301152 | 2304376 | 3225 reverse | 2.194 | 1.134  | 0.005 | 0.025 | 0.400 | 2.832  | CDS  | GI:188595593 | BAG34568.1 |
| AP009380 | PGN_2051  | conserved hypothetical protein                        | 2304373 | 2305308 | 936 reverse  | 2.861 | 1.517  | 0.000 | 0.000 | 0.343 | 4.416  | CDS  | GI:188595594 | BAG34569.1 |
| AP009380 | PGN_2052  | conserved hypothetical protein                        | 2305278 | 2306204 | 927 reverse  | 1.849 | 0.887  | 0.001 | 0.005 | 0.256 | 3.464  | CDS  | GI:188595595 | BAG34570.1 |
| AP009380 | PGN_2053  | conserved hypothetical protein                        | 2306216 | 2306947 | 732 reverse  | 1.814 | 0.860  | 0.000 | 0.000 | 0.196 | 4.390  | CDS  | GI:188595596 | BAG34571.1 |
| AP009380 | PGN_2054  | putative glycerol-3-phosphate cytidyltransferase      | 2306953 | 2307411 | 459 reverse  | 1.307 | 0.386  | 0.085 | 0.189 | 0.224 | 1.723  | CDS  | GI:188595597 | BAG34572.1 |
| AP009380 | PGN_2055  | putative 4-hydroxythreonine-4-phosphate dehydrogenase | 2307433 | 2308530 | 1098 reverse | 1.564 | 0.645  | 0.015 | 0.057 | 0.265 | 2.435  | CDS  | GI:188595598 | BAG34573.1 |
| AP009380 | PGN_2056  | conserved hypothetical protein                        | 2308574 | 2309629 | 1056 reverse | 1.303 | 0.381  | 0.046 | 0.122 | 0.191 | 1.994  | CDS  | GI:188595599 | BAG34574.1 |
| AP009380 | PGN_2057  | conserved hypothetical protein                        | 2309720 | 2310778 | 1059 reverse | 1.025 | 0.036  | 0.926 | 0.952 | 0.386 | 0.093  | CDS  | GI:188595600 | BAG34575.1 |
| AP009380 | PGN_2058  | conserved hypothetical protein                        | 2310791 | 2311195 | 405 reverse  | 0.571 | -0.808 | 0.003 | 0.017 | 0.268 | -3.010 | CDS  | GI:188595601 | BAG34576.1 |
| AP009380 | PGN_2059  | conserved hypothetical protein                        | 2311199 | 2311405 | 207 forward  | 1.542 | 0.625  | 0.037 | 0.106 | 0.300 | 2.081  | CDS  | GI:188595602 | BAG34577.1 |
| AP009380 | PGN_2060  | histidyl-tRNA synthetase                              | 2311410 | 2312774 | 1365 reverse | 1.739 | 0.798  | 0.001 | 0.008 | 0.243 | 3.283  | CDS  | GI:188595603 | BAG34578.1 |
| AP009380 | PGN_2061  | probable dihydrofolate reductase                      | 2312835 | 2313323 | 489 reverse  | 1.677 | 0.746  | 0.000 | 0.003 | 0.202 | 3.698  | CDS  | GI:188595604 | BAG34579.1 |
| AP009380 | PGN_2062  | thymidylate synthase                                  | 2313369 | 2314172 | 804 reverse  | 1.038 | 0.054  | 0.838 | 0.896 | 0.264 | 0.205  | CDS  | GI:188595605 | BAG34580.1 |
| AP009380 | PGN_2063  | hypothetical protein                                  | 2314204 | 2314305 | 102 forward  | 0.728 | -0.458 | 0.350 | 0.498 | 0.491 | -0.934 | CDS  | GI:188595606 | BAG34581.1 |
| AP009380 | PGN_2064  | putative peptidase M48 family                         | 2314396 | 2315193 | 798 forward  | 1.033 | 0.047  | 0.823 | 0.884 | 0.210 | 0.223  | CDS  | GI:188595607 | BAG34582.1 |
| AP009380 | PGN_2065  | putative Lys- and Arg- gingipain domain protein       | 2315403 | 2316284 | 882 forward  | 0.448 | -1.160 | 0.005 | 0.027 | 0.414 | -2.800 | CDS  | GI:188595608 | BAG34583.1 |
| AP009380 | PGN_2066  | putative ABC transporter ATP-binding protein          | 2316526 | 2318463 | 1938 reverse | 0.963 | -0.054 | 0.826 | 0.886 | 0.248 | -0.219 | CDS  | GI:188595609 | BAG34584.1 |
| AP009380 | PGN_2067  | TPR domain protein                                    | 2318460 | 2320547 | 2088 reverse | 1.023 | 0.033  | 0.886 | 0.929 | 0.231 | 0.144  | CDS  | GI:188595610 | BAG34585.1 |
| AP009380 | PGN_2068  | putative peptide deformylase                          | 2320583 | 2321152 | 570 reverse  | 0.811 | -0.302 | 0.253 | 0.399 | 0.264 | -1.143 | CDS  | GI:188595611 | BAG34586.1 |
| AP009380 | PGN_2069  | probable endonuclease                                 | 2321257 | 2321709 | 453 reverse  | 0.661 | -0.598 | 0.012 | 0.048 | 0.238 | -2.519 | CDS  | GI:188595612 | BAG34587.1 |
| AP009380 | PGN_2070  | conserved hypothetical protein                        | 2322232 | 2327898 | 5667 forward | 0.679 | -0.560 | 0.059 | 0.144 | 0.297 | -1.886 | CDS  | GI:188595613 | BAG34588.1 |
| AP009380 | PGN_2071  | probable ketopantoate reductase ApbA/PanE             | 2327912 | 2328856 | 945 forward  | 0.788 | -0.343 | 0.112 | 0.228 | 0.216 | -1.589 | CDS  | GI:188595614 | BAG34589.1 |
| AP009380 | PGN_2072  | ABC transporter ATP-binding protein                   | 2328991 | 2330607 | 1617 reverse | 1.114 | 0.156  | 0.525 | 0.652 | 0.245 | 0.636  | CDS  | GI:188595615 | BAG34590.1 |
| AP009380 | PGN_2073  | conserved hypothetical protein                        | 2330881 | 2331900 | 1020 reverse | 0.674 | -0.568 | 0.100 | 0.212 | 0.345 | -1.645 | CDS  | GI:188595616 | BAG34591.1 |
| AP009380 | PGN_2074  | conserved hypothetical protein                        | 2332150 | 2332404 | 255 reverse  | 0.528 | -0.922 | 0.000 | 0.005 | 0.264 | -3.490 | CDS  | GI:188595617 | BAG34592.1 |
| AP009380 | PGN_2075  | exonuclease ABC A subunit                             | 2332428 | 2335289 | 2862 reverse | 0.973 | -0.039 | 0.882 | 0.926 | 0.266 | -0.148 | CDS  | GI:188595618 | BAG34593.1 |
| AP009380 | PGN_10050 | tRNA-Leu                                              | 2335414 | 2335497 | 84 reverse   | 0.430 | -1.217 | 0.003 | 0.017 | 0.404 | -3.009 | rRNA |              |            |
| AP009380 | PGN_10051 | tRNA-Leu                                              | 2335529 | 2335614 | 86 reverse   | 0.367 | -1.446 | 0.001 | 0.009 | 0.446 | -3.244 | rRNA |              |            |
| AP009380 | PGN_10052 | tRNA-Gly                                              | 2335702 | 2335777 | 76 reverse   | 0.374 | -1.417 | 0.000 | 0.004 | 0.398 | -3.560 | rRNA |              |            |
| AP009380 | PGN_2076  | conserved hypothetical protein                        | 2335963 | 2336247 | 285 reverse  | 0.548 | -0.867 | 0.006 | 0.032 | 0.318 | -2.724 | CDS  | GI:188595619 | BAG34594.1 |
| AP009380 | PGN_2077  | conserved hypothetical protein                        | 2336328 | 2336510 | 183 reverse  | 0.441 | -1.181 | 0.002 | 0.015 | 0.388 | -3.046 | CDS  | GI:188595620 | BAG34595.1 |
| AP009380 | PGN_2078  | conserved hypothetical protein                        | 2336702 | 2338054 | 1353 reverse | 1.192 | 0.253  | 0.218 | 0.362 | 0.206 | 1.231  | CDS  | GI:188595621 | BAG34596.1 |
| AP009380 | PGN_2079  | mannose-1-phosphate guanylyltransferase               | 2338089 | 2339174 | 1086 reverse | 0.986 | -0.021 | 0.933 | 0.955 | 0.246 | -0.084 | CDS  | GI:188595622 | BAG34597.1 |
| AP009380 | PGN_2080  | conserved hypothetical protein                        | 2339249 | 2340979 | 1731 forward | 1.789 | 0.839  | 0.036 | 0.102 | 0.400 | 2.100  | CDS  | GI:188595623 | BAG34598.1 |
| AP009380 | PGN_2081  | 1-deoxy-D-xylulose 5-phosphate synthase               | 2341152 | 2343056 | 1905 forward | 1.177 | 0.235  | 0.274 | 0.422 | 0.215 | 1.094  | CDS  | GI:188595624 | BAG34599.1 |
| AP009380 | PGN_2082  | putative potassium uptake protein TrkA                | 2343110 | 2344450 | 1341 forward | 1.012 | 0.017  | 0.935 | 0.956 | 0.210 | 0.081  | CDS  | GI:188595625 | BAG34600.1 |
| AP009380 | PGN_2083  | potassium uptake protein TrkH                         | 2344477 | 2345940 | 1464 forward | 1.128 | 0.173  | 0.412 | 0.551 | 0.211 | 0.820  | CDS  | GI:188595626 | BAG34601.1 |
| AP009380 | PGN_10053 | tRNA-Cys                                              | 2346132 | 2346202 | 71 reverse   | 0.652 | -0.617 | 0.111 | 0.226 | 0.387 | -1.596 | rRNA |              |            |
| AP009380 | PGN_2084  | conserved hypothetical protein                        | 2346590 | 2346742 | 153 forward  | 1.105 | 0.144  | 0.663 | 0.764 | 0.330 | 0.436  | CDS  | GI:188595627 | BAG34602.1 |
| AP009380 | PGN_2085  | putative Fe-S oxidoreductases                         | 2346976 | 2348310 | 1335 forward | 1.396 | 0.481  | 0.023 | 0.076 | 0.212 | 2.265  | CDS  | GI:188595628 | BAG34603.1 |
| AP009380 | PGN_2086  | probable acetyltransferase                            | 2348358 | 2349224 | 867 forward  | 1.320 | 0.401  | 0.158 | 0.287 | 0.284 | 1.413  | CDS  | GI:188595629 | BAG34604.1 |
| AP009380 | PGN_2087  | glycosyltransferase                                   | 2349263 | 2350231 | 969 forward  | 1.913 | 0.936  | 0.001 | 0.006 | 0.276 | 3.394  | CDS  | GI:188595630 | BAG34605.1 |
| AP009380 | PGN_2088  | conserved hypothetical protein                        | 2350373 | 2350969 | 597 forward  | 0.761 | -0.395 | 0.209 | 0.350 | 0.314 | -1.256 | CDS  | GI:188595631 | BAG34606.1 |
| AP009380 | PGN_2089  | conserved hypothetical protein                        | 2350962 | 2351258 | 297 forward  | 0.954 | -0.068 | 0.800 | 0.866 | 0.270 | -0.253 | CDS  | GI:188595632 | BAG34607.1 |
| AP009380 | PGN_2090  | conserved hypothetical protein                        | 2351338 | 2353560 | 2223 forward | 0.817 | -0.292 | 0.409 | 0.549 | 0.353 | -0.825 | CDS  | GI:188595633 | BAG34608.1 |
| AP009380 | PGN_2091  | conserved hypothetical protein                        | 2353557 | 2354213 | 657 forward  | 0.807 | -0.309 | 0.281 | 0.429 | 0.287 | -1.078 | CDS  | GI:188595634 | BAG34609.1 |
